# Supplementary material for: Prioritization of anti-malarial hits from nature: chemo-informatic profiling of natural products with in vitro antiplasmodial activities and currently registered anti-malarial drugs
Source: Springer Nature journal article supplement (doi:10.1186/s12936-016-1087-y), 2016-01-28
Supplement: MOESM4 [file 9762042]

| Structure 1                                                                         | Structure 2                                                                         | ID 1 | ID 2  | Similarity | Activity 1 | Activity 2 | Delta Activity | SALI   |
|-------------------------------------------------------------------------------------|-------------------------------------------------------------------------------------|------|-------|------------|------------|------------|----------------|--------|
| 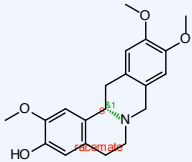   |    | N408 | N1228 | 0.87452    | 1.6        | 5223.1006  | 5221.5         | 41613  |
|    |    | N408 | N1225 | 0.88696    | 1.6        | 2460.4502  | 2458.9         | 21751  |
|    |    | N436 | N1210 | 0.92856    | 2          | 175.89316  | 173.89         | 2434.2 |
|    |    | N848 | N1210 | 0.92464    | 8.5500002  | 175.89316  | 167.34         | 2220.6 |
|    |    | N343 | N572  | 0.99861    | 1.1        | 3.9000001  | 2.8            | 2019.2 |
|   |   | N750 | N1202 | 0.93418    | 6.4000001  | 122.39007  | 115.99         | 1762.3 |
|  |  | N219 | N1148 | 0.97061    | 0.30000001 | 50.700001  | 50.4           | 1714.8 |
|  |  | N203 | N1138 | 0.97212    | 0.25999999 | 47.130001  | 46.87          | 1681.1 |
|  |  | N378 | N1138 | 0.97212    | 1.4        | 47.130001  | 45.73          | 1640.3 |
|  |  | N545 | N1142 | 0.97138    | 3.5        | 49.599998  | 46.1           | 1610.8 |
|  |  | N355 | N1212 | 0.88459    | 1.2        | 186.38351  | 185.18         | 1604.5 |

| Structure 1                                                                         | Structure 2                                                                         | ID 1 | ID 2  | Similarity | Activity 1 | Activity 2 | Delta Activity | SALI   |
|-------------------------------------------------------------------------------------|-------------------------------------------------------------------------------------|------|-------|------------|------------|------------|----------------|--------|
| 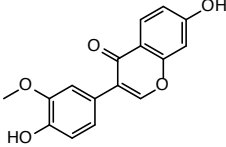   |    | N771 | N1212 | 0.88001    | 6.8000002  | 186.38351  | 179.58         | 1496.7 |
|    |    | N887 | N1198 | 0.92683    | 9.8000002  | 114.9      | 105.1          | 1436.3 |
|    |    | N355 | N1208 | 0.88278    | 1.2        | 166.52075  | 165.32         | 1410.4 |
|    |    | N436 | N1208 | 0.87695    | 2          | 166.52075  | 164.52         | 1337   |
|    |    | N490 | N1203 | 0.88759    | 2.7915556  | 129        | 126.21         | 1122.8 |
|   |   | N874 | N1207 | 0.86023    | 9.3000002  | 155.82974  | 146.53         | 1048.4 |
|  |  | N848 | N1208 | 0.84721    | 8.5500002  | 166.52075  | 157.97         | 1033.9 |
|  |  | N219 | N1142 | 0.9512     | 0.3000000  | 49.599998  | 49.3           | 1010.2 |
|  |  | N867 | N1184 | 0.93327    | 9          | 74.900002  | 65.9           | 987.5  |
|  |  | N848 | N1212 | 0.81858    | 8.5500002  | 186.38351  | 177.83         | 980.2  |
|  |  | N771 | N1208 | 0.83358    | 6.8000002  | 166.52075  | 159.72         | 959.73 |

| Structure 1                                                                         | Structure 2                                                                         | ID 1 | ID 2  | Similarity | Activity 1 | Activity 2 | Delta Activity | SALI   |
|-------------------------------------------------------------------------------------|-------------------------------------------------------------------------------------|------|-------|------------|------------|------------|----------------|--------|
| 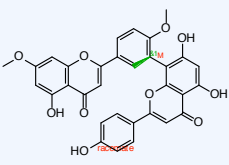   |    | N441 | N1138 | 0.95245    | 2          | 47.130001  | 45.13          | 949.03 |
|    |    | N545 | N1138 | 0.95245    | 3.5        | 47.130001  | 43.63          | 917.49 |
|    |    | N355 | N1210 | 0.80737    | 1.2        | 175.89316  | 174.69         | 906.89 |
|    |    | N220 | N1148 | 0.94432    | 0.3000000  | 50.700001  | 50.4           | 905.19 |
|    |    | N771 | N1210 | 0.81211    | 6.8000002  | 175.89316  | 169.09         | 899.98 |
|   |   | N511 | N1207 | 0.82948    | 3          | 155.82974  | 152.83         | 896.28 |
|  |  | N408 | N1151 | 0.94338    | 1.6        | 52.299999  | 50.7           | 895.46 |
|  |  | N206 | N1138 | 0.94713    | 0.2599999  | 47.130001  | 46.87          | 886.45 |
|  |  | N858 | N1208 | 0.82138    | 8.6999998  | 166.52075  | 157.82         | 883.55 |
|  |  | N19  | N1202 | 0.85122    | 1.21       | 122.39007  | 121.18         | 814.48 |
|  |  | N748 | N1208 | 0.80261    | 6.3000002  | 166.52075  | 160.22         | 811.71 |

| Structure 1                                                                         | Structure 2                                                                         | ID 1 | ID 2  | Similarity | Activity 1 | Activity 2 | Delta Activity | SALI   |
|-------------------------------------------------------------------------------------|-------------------------------------------------------------------------------------|------|-------|------------|------------|------------|----------------|--------|
| 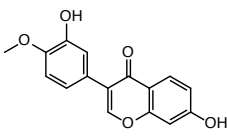   |    | N355 | N1195 | 0.86904    | 1.2        | 103.7      | 102.5          | 782.7  |
|    |    | N436 | N1195 | 0.86721    | 2          | 103.7      | 101.7          | 765.87 |
|    |    | N889 | N1161 | 0.93422    | 9.8999996  | 58.586784  | 48.687         | 740.2  |
|    |    | N693 | N1193 | 0.87063    | 5.5999999  | 101.27     | 95.67          | 739.51 |
|    |    | N436 | N1206 | 0.80547    | 2          | 141        | 139            | 714.54 |
|   |   | N771 | N1195 | 0.86427    | 6.8000002  | 103.7      | 96.9           | 713.91 |
|  |  | N203 | N1142 | 0.93015    | 0.25999999 | 49.599998  | 49.34          | 706.41 |
|  |  | N447 | N988  | 0.98155    | 2.0409496  | 15.038058  | 12.997         | 704.3  |
|  |  | N851 | N1045 | 0.98194    | 8.6000004  | 21.1       | 12.5           | 692.05 |
|  |  | N378 | N1142 | 0.93015    | 1.4        | 49.599998  | 48.2           | 690.09 |
|  |  | N441 | N1148 | 0.92835    | 2          | 50.700001  | 48.7           | 679.7  |

| Structure 1                                                                         | Structure 2                                                                         | ID 1 | ID 2  | Similarity | Activity 1 | Activity 2 | Delta Activity | SALI   |
|-------------------------------------------------------------------------------------|-------------------------------------------------------------------------------------|------|-------|------------|------------|------------|----------------|--------|
| 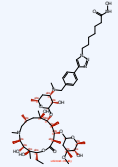   |    | N149 | N530  | 0.99514    | 0.09499999 | 3.3        | 3.205          | 659.36 |
|    |    | N545 | N1148 | 0.92835    | 3.5        | 50.700001  | 47.2           | 658.77 |
|    |    | N441 | N1142 | 0.92606    | 2          | 49.599998  | 47.6           | 643.74 |
|    |    | N220 | N1142 | 0.92279    | 0.30000001 | 49.599998  | 49.3           | 638.5  |
|    |    | N577 | N1201 | 0.80547    | 3.98       | 120        | 116.02         | 596.41 |
|  |  | N837 | N1197 | 0.81057    | 8.1999998  | 110.4      | 102.2          | 539.52 |
|  |  | N848 | N1195 | 0.82039    | 8.5500002  | 103.7      | 95.15          | 529.75 |
|  |  | N219 | N1138 | 0.90854    | 0.30000001 | 47.130001  | 46.83          | 512.04 |
|  |  | N581 | N1118 | 0.93298    | 4          | 37.896145  | 33.896         | 505.79 |
|  |  | N206 | N1142 | 0.90062    | 0.25999999 | 49.599998  | 49.34          | 496.46 |
|  |  | N577 | N1171 | 0.8703     | 3.98       | 65.900002  | 61.92          | 477.39 |

| Structure 1                                                                                              | Structure 2                                                                                              | ID 1 | ID 2  | Similarity | Activity 1 | Activity 2 | Delta Activity | SALI   |
|----------------------------------------------------------------------------------------------------------|----------------------------------------------------------------------------------------------------------|------|-------|------------|------------|------------|----------------|--------|
| 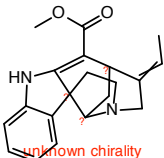<br>unknown chirality   | <br>unknown chirality   | N490 | N1126 | 0.91891    | 2.7915556  | 41.299999  | 38.508         | 474.87 |
| <br>racemate            | <br>racemate            | N203 | N1148 | 0.88118    | 0.2599999  | 50.700001  | 50.44          | 424.5  |
| <br>racemate            | <br>racemate            | N378 | N1148 | 0.88118    | 1.4        | 50.700001  | 49.3           | 414.91 |
| <br>unknown chirality   | <br>unknown chirality   | N693 | N1177 | 0.84015    | 5.5999999  | 68.400002  | 62.8           | 392.87 |
| <br>racemate            | <br>racemate            | N220 | N1138 | 0.87747    | 0.3000000  | 47.130001  | 46.83          | 382.18 |
| <br>unknown chirality | <br>unknown chirality | N804 | N1186 | 0.80669    | 7.5100002  | 81.099998  | 73.59          | 380.69 |
| <br>unknown chirality | <br>unknown chirality | N123 | N1115 | 0.90226    | 0.0390000  | 36         | 35.961         | 367.94 |
| <br>unknown chirality | <br>unknown chirality | N401 | N1104 | 0.91811    | 1.5604362  | 31.013609  | 29.453         | 359.66 |
| <br>racemate          | <br>racemate          | N763 | N1137 | 0.88944    | 6.5999999  | 46         | 39.4           | 356.36 |
| <br>racemate          | <br>racemate          | N577 | N1094 | 0.92368    | 3.98       | 29.799999  | 25.82          | 338.33 |
| <br>racemate          | <br>racemate          | N206 | N1148 | 0.84897    | 0.2599999  | 50.700001  | 50.44          | 333.97 |

| Structure 1                                                                         | Structure 2                                                                         | ID 1 | ID 2  | Similarity | Activity 1 | Activity 2 | Delta Activity | SALI   |
|-------------------------------------------------------------------------------------|-------------------------------------------------------------------------------------|------|-------|------------|------------|------------|----------------|--------|
| 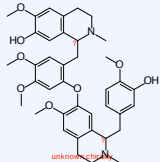   |    | N388 | N1122 | 0.88362    | 1.5        | 40.299999  | 38.8           | 333.38 |
|    |    | N577 | N1170 | 0.80337    | 3.98       | 65.5       | 61.52          | 312.87 |
|    |    | N377 | N1041 | 0.93922    | 1.4        | 20         | 18.6           | 306.02 |
|    |    | N577 | N1137 | 0.85878    | 3.98       | 46         | 42.02          | 297.56 |
|    |    | N867 | N1134 | 0.87552    | 9          | 44.325073  | 35.325         | 283.77 |
|   |   | N861 | N1095 | 0.92493    | 8.8999996  | 29.9       | 21             | 279.74 |
|  |  | N729 | N1091 | 0.91993    | 6          | 28         | 22             | 274.76 |
|  |  | N738 | N1152 | 0.82451    | 6.0999999  | 53         | 46.9           | 267.25 |
|  |  | N577 | N1134 | 0.84732    | 3.98       | 44.325073  | 40.345         | 264.25 |
|  |  | N408 | N1108 | 0.88064    | 1.6        | 32.599998  | 31             | 259.72 |
|  |  | N96  | N997  | 0.93686    | 0.0106     | 15.963046  | 15.952         | 252.66 |

| Structure 1                                                                         | Structure 2                                                                         | ID 1 | ID 2  | Similarity | Activity 1 | Activity 2 | Delta Activity | SALI   |
|-------------------------------------------------------------------------------------|-------------------------------------------------------------------------------------|------|-------|------------|------------|------------|----------------|--------|
| 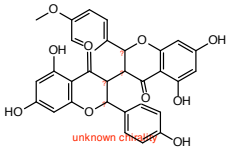   |    | N322 | N795  | 0.97238    | 0.9703220  | 7.3000002  | 6.3297         | 229.21 |
|    |    | N720 | N743  | 0.99883    | 6          | 6.2685881  | 0.26859        | 229.13 |
|    |    | N351 | N1117 | 0.83953    | 1.1617441  | 37.691902  | 36.53          | 227.64 |
|    |    | N701 | N1118 | 0.85813    | 5.752852   | 37.896145  | 32.143         | 226.57 |
|    |    | N382 | N1118 | 0.83618    | 1.4920259  | 37.896145  | 36.404         | 222.22 |
|   |   | N520 | N1052 | 0.9103     | 3.0999999  | 22         | 18.9           | 210.7  |
|  |  | N267 | N639  | 0.97947    | 0.5500000  | 4.8000002  | 4.25           | 207.01 |
|  |  | N387 | N1117 | 0.81874    | 1.5        | 37.691902  | 36.192         | 199.66 |
|  |  | N740 | N1022 | 0.94027    | 6.0999999  | 17.9       | 11.8           | 197.56 |
|  |  | N286 | N1099 | 0.84495    | 0.6402874  | 30.28899   | 29.649         | 191.22 |
|  |  | N577 | N1123 | 0.80401    | 3.98       | 40.900002  | 36.92          | 188.37 |



| Structure 1                                                                         | Structure 2                                                                         | ID 1 | ID 2  | Similarity | Activity 1 | Activity 2 | Delta Activity | SALI   |
|-------------------------------------------------------------------------------------|-------------------------------------------------------------------------------------|------|-------|------------|------------|------------|----------------|--------|
| 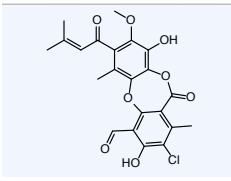   |    | N792 | N1052 | 0.91993    | 7.1999998  | 22         | 14.8           | 184.84 |
|    |    | N358 | N844  | 0.9608     | 1.3        | 8.3999996  | 7.1            | 181.14 |
|    |    | N286 | N1084 | 0.85759    | 0.6402874  | 26.251785  | 25.611         | 179.84 |
|    |    | N682 | N1118 | 0.81693    | 5.4273667  | 37.896145  | 32.469         | 177.36 |
|    |    | N370 | N1054 | 0.87946    | 1.353928   | 22.694511  | 21.341         | 177.04 |
|   |   | N738 | N1095 | 0.86177    | 6.0999999  | 29.9       | 23.8           | 172.17 |
|  |  | N355 | N771  | 0.96694    | 1.2        | 6.8000002  | 5.6            | 169.38 |
|  |  | N812 | N1013 | 0.94476    | 7.6999998  | 17         | 9.3            | 168.35 |
|  |  | N245 | N1054 | 0.86752    | 0.4000000  | 22.694511  | 22.295         | 168.29 |
|  |  | N86  | N927  | 0.93418    | 0.0020000  | 10.625     | 10.623         | 161.4  |
|  |  | N114 | N782  | 0.95559    | 0.02       | 7          | 6.98           | 157.18 |

| Structure 1                                                                         | Structure 2                                                                         | ID 1 | ID 2  | Similarity | Activity 1 | Activity 2 | Delta Activity | SALI   |
|-------------------------------------------------------------------------------------|-------------------------------------------------------------------------------------|------|-------|------------|------------|------------|----------------|--------|
| 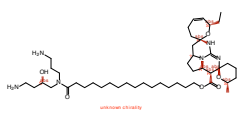   |    | N198 | N621  | 0.97269    | 0.23999999 | 4.5        | 4.26           | 155.96 |
|    |    | N418 | N820  | 0.96006    | 1.7        | 7.9000001  | 6.2            | 155.22 |
|    |    | N775 | N983  | 0.94673    | 7          | 15         | 8              | 150.17 |
|    |    | N779 | N1052 | 0.8973     | 7          | 22         | 15             | 146.05 |
|    |    | N878 | N1112 | 0.82392    | 9.5        | 33.299999  | 23.8           | 135.17 |
|  |  | N355 | N1053 | 0.83872    | 1.2        | 22.5       | 21.3           | 132.07 |
|  |  | N98  | N997  | 0.87695    | 0.0108     | 15.963046  | 15.952         | 129.64 |
|  |  | N306 | N880  | 0.9308     | 0.80000001 | 9.6000004  | 8.8            | 127.17 |
|  |  | N812 | N986  | 0.94215    | 7.6999998  | 15         | 7.3            | 126.19 |
|  |  | N812 | N999  | 0.93418    | 7.6999998  | 16         | 8.3            | 126.11 |
|  |  | N241 | N207  | 0.99915    | 0.3709354  | 0.2649538  | 0.10598        | 124.43 |

| Structure 1                                                                         | Structure 2                                                                         | ID 1 | ID 2  | Similarity | Activity 1 | Activity 2 | Delta Activity | SALI   |
|-------------------------------------------------------------------------------------|-------------------------------------------------------------------------------------|------|-------|------------|------------|------------|----------------|--------|
| 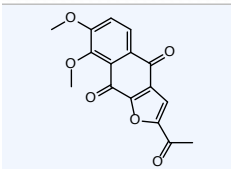   |    | N496 | N946  | 0.92895    | 2.96       | 11.8       | 8.84           | 124.42 |
|    |    | N186 | N987  | 0.87829    | 0.2        | 15         | 14.8           | 121.6  |
|    |    | N406 | N811  | 0.94943    | 1.6        | 7.6999998  | 6.1            | 120.63 |
|    |    | N219 | N545  | 0.97311    | 0.3000000  | 3.5        | 3.2            | 119.01 |
|    |    | N186 | N974  | 0.88214    | 0.2        | 14         | 13.8           | 117.09 |
|   |   | N199 | N987  | 0.87271    | 0.2399999  | 15         | 14.76          | 115.95 |
|  |  | N876 | N1094 | 0.82229    | 9.5        | 29.799999  | 20.3           | 114.23 |
|  |  | N123 | N1045 | 0.81333    | 0.0390000  | 21.1       | 21.061         | 112.82 |
|  |  | N199 | N974  | 0.87642    | 0.2399999  | 14         | 13.76          | 111.34 |
|  |  | N362 | N998  | 0.86745    | 1.3        | 16         | 14.7           | 110.91 |
|  |  | N837 | N1042 | 0.88713    | 8.1999998  | 20.099339  | 11.899         | 105.42 |

| Structure 1 | Structure 2 | ID 1 | ID 2  | Similarity | Activity 1                  | Activity 2 | Delta Activity | SALI   |
|-------------|-------------|------|-------|------------|-----------------------------|------------|----------------|--------|
|             |             | N874 | N1066 | 0.85377    | 9.3000002                   | 24.5       | 15.2           | 103.95 |
|             |             | N123 | N1012 | 0.83274    | 0.0390000(17                |            | 16.961         | 101.4  |
|             |             | N361 | N921  | 0.90883    | 1.3                         | 10.5       | 9.2            | 100.91 |
|             |             | N306 | N1003 | 0.84621    | 0.8000000:16.299999         |            | 15.5           | 100.79 |
|             |             | N366 | N798  | 0.94042    | 1.3158381                   | 7.3045239  | 5.9887         | 100.51 |
|             |             | N436 | N1018 | 0.84495    | 2                           | 17.4       | 15.4           | 99.323 |
|             |             | N176 | N142  | 0.99913    | 0.1718350:0.0854246:0.08641 |            |                | 98.883 |
|             |             | N768 | N934  | 0.95739    | 6.6999998                   | 10.9       | 4.2            | 98.578 |
|             |             | N771 | N1053 | 0.83872    | 6.8000002                   | 22.5       | 15.7           | 97.346 |
|             |             | N748 | N1073 | 0.80821    | 6.3000002                   | 24.799999  | 18.5           | 96.459 |
|             |             | N267 | N628  | 0.95752    | 0.5500000:4.645926          |            | 4.0959         | 96.428 |

| Structure 1                                                                         | Structure 2                                                                         | ID 1 | ID 2  | Similarity | Activity 1 | Activity 2 | Delta Activity | SALI   |
|-------------------------------------------------------------------------------------|-------------------------------------------------------------------------------------|------|-------|------------|------------|------------|----------------|--------|
| 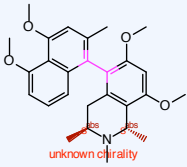   |    | N864 | N996  | 0.92652    | 9          | 15.9       | 6.9            | 93.902 |
|    |    | N738 | N979  | 0.90712    | 6.0999999  | 14.7       | 8.6            | 92.591 |
|    |    | N436 | N848  | 0.92856    | 2          | 8.5500002  | 6.55           | 91.687 |
|    |    | N451 | N997  | 0.84799    | 2.0999999  | 15.963046  | 13.863         | 91.198 |
|    |    | N524 | N743  | 0.96668    | 3.2350938  | 6.2685881  | 3.0335         | 91.033 |
|   |   | N655 | N984  | 0.88924    | 5          | 15         | 10             | 90.288 |
|  |  | N651 | N984  | 0.88773    | 5          | 15         | 10             | 89.069 |
|  |  | N600 | N725  | 0.98078    | 4.3000002  | 6          | 1.7            | 88.435 |
|  |  | N229 | N798  | 0.91946    | 0.34058326 | 7.3045239  | 6.9639         | 86.463 |
|  |  | N654 | N984  | 0.88041    | 5          | 15         | 10             | 83.619 |
|  |  | N858 | N1073 | 0.807      | 8.6999998  | 24.799999  | 16.1           | 83.422 |

| Structure 1                                                                         | Structure 2                                                                         | ID 1 | ID 2 | Similarity | Activity 1          | Activity 2 | Delta Activity | SALI   |
|-------------------------------------------------------------------------------------|-------------------------------------------------------------------------------------|------|------|------------|---------------------|------------|----------------|--------|
| 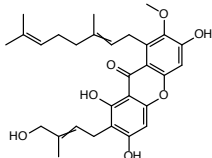   |    | N524 | N720 | 0.96668    | 3.2350938           | 6          | 2.7649         | 82.972 |
|    |    | N550 | N925 | 0.91556    | 3.5999999           | 10.596756  | 6.9968         | 82.862 |
|    |    | N442 | N996 | 0.83011    | 2                   | 15.9       | 13.9           | 81.819 |
|    |    | N492 | N328 | 0.97642    | 2.9000001           | 1          | 1.9            | 80.578 |
|    |    | N378 | N545 | 0.97381    | 1.4                 | 3.5        | 2.1            | 80.175 |
|   |   | N86  | N785 | 0.91135    | 0.0020000(7.0999999 | 7.098      |                | 80.064 |
|  |  | N520 | N779 | 0.95123    | 3.0999999           | 7          | 3.9            | 79.97  |
|  |  | N178 | N987 | 0.81061    | 0.1800000(15        |            | 14.82          | 78.251 |
|  |  | N457 | N984 | 0.8351     | 2.2                 | 15         | 12.8           | 77.622 |
|  |  | N616 | N996 | 0.85242    | 4.5                 | 15.9       | 11.4           | 77.246 |
|  |  | N520 | N957 | 0.88025    | 3.0999999           | 12.3       | 9.2            | 76.829 |

| Structure 1                                                                         | Structure 2                                                                         | ID 1 | ID 2  | Similarity | Activity 1   | Activity 2 | Delta Activity | SALI   |
|-------------------------------------------------------------------------------------|-------------------------------------------------------------------------------------|------|-------|------------|--------------|------------|----------------|--------|
| 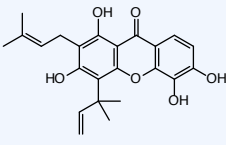   |    | N344 | N998  | 0.80512    | 1.1          | 16         | 14.9           | 76.457 |
|    |    | N866 | N1043 | 0.84958    | 9            | 20.5       | 11.5           | 76.452 |
|    |    | N589 | N784  | 0.96054    | 4.0999999    | 7.0673671  | 2.9674         | 75.208 |
|    |    | N178 | N974  | 0.81554    | 0.1800000:14 |            | 13.82          | 74.923 |
|    |    | N482 | N997  | 0.82157    | 2.5999999    | 15.963046  | 13.363         | 74.891 |
|   |   | N205 | N826  | 0.89608    | 0.2599999:8  |            | 7.74           | 74.478 |
|  |  | N468 | N966  | 0.85816    | 2.3699999    | 12.8       | 10.43          | 73.533 |
|  |  | N19  | N750  | 0.92901    | 1.21         | 6.4000001  | 5.19           | 73.112 |
|  |  | N539 | N1009 | 0.81482    | 3.4000001    | 16.92      | 13.52          | 73.01  |
|  |  | N867 | N1008 | 0.89051    | 9            | 16.9       | 7.9            | 72.156 |
|  |  | N766 | N1046 | 0.7981     | 6.6999998    | 21.172588  | 14.473         | 71.681 |

| Structure 1                                                                         | Structure 2                                                                         | ID 1 | ID 2  | Similarity | Activity 1 | Activity 2 | Delta Activity | SALI   |
|-------------------------------------------------------------------------------------|-------------------------------------------------------------------------------------|------|-------|------------|------------|------------|----------------|--------|
| 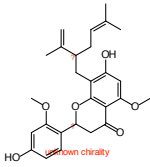   |    | N469 | N997  | 0.81007    | 2.4000001  | 15.963046  | 13.563         | 71.412 |
|    |    | N442 | N662  | 0.95739    | 2          | 5          | 3              | 70.413 |
|    |    | N858 | N1053 | 0.80103    | 8.6999998  | 22.5       | 13.8           | 69.356 |
|    |    | N880 | N1003 | 0.90325    | 9.6000004  | 16.299999  | 6.7            | 69.25  |
|    |    | N656 | N984  | 0.85528    | 5          | 15         | 10             | 69.098 |
|   |   | N577 | N1018 | 0.80547    | 3.98       | 17.4       | 13.42          | 68.986 |
|  |  | N266 | N665  | 0.93395    | 0.52862251 | 5.0829086  | 4.5543         | 68.953 |
|  |  | N267 | N847  | 0.88416    | 0.55000001 | 8.5167503  | 7.9668         | 68.773 |
|  |  | N352 | N977  | 0.80547    | 1.2        | 14.5       | 13.3           | 68.37  |
|  |  | N582 | N820  | 0.94068    | 4          | 7.9000001  | 3.9            | 65.75  |
|  |  | N878 | N1051 | 0.80862    | 9.5        | 22         | 12.5           | 65.315 |



| Structure 1                                                                         | Structure 2                                                                         | ID 1 | ID 2  | Similarity | Activity 1       | Activity 2 | Delta Activity | SALI   |
|-------------------------------------------------------------------------------------|-------------------------------------------------------------------------------------|------|-------|------------|------------------|------------|----------------|--------|
| 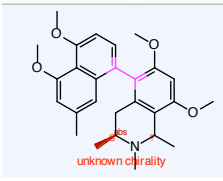   |    | N605 | N996  | 0.82114    | 4.4000001        | 15.9       | 11.5           | 64.295 |
|    |    | N355 | N935  | 0.84721    | 1.2              | 10.91      | 9.71           | 63.553 |
|    |    | N603 | N824  | 0.94314    | 4.4000001        | 8          | 3.6            | 63.311 |
|    |    | N219 | N441  | 0.97311    | 0.3000000:2      |            | 1.7            | 63.225 |
|    |    | N766 | N1018 | 0.82972    | 6.6999998        | 17.4       | 10.7           | 62.836 |
|   |   | N220 | N545  | 0.94777    | 0.3000000:3.5    |            | 3.2            | 61.262 |
|  |  | N88  | N927  | 0.82657    | 0.0023000(10.625 |            | 10.623         | 61.249 |
|  |  | N85  | N946  | 0.807      | 0.0020000(11.8   |            | 11.798         | 61.131 |
|  |  | N766 | N1008 | 0.83272    | 6.6999998        | 16.9       | 10.2           | 60.976 |
|  |  | N616 | N864  | 0.92602    | 4.5              | 9          | 4.5            | 60.827 |
|  |  | N123 | N894  | 0.83607    | 0.0390000(10     |            | 9.961          | 60.763 |

| Structure 1                                                                         | Structure 2                                                                         | ID 1 | ID 2  | Similarity | Activity 1 | Activity 2 | Delta Activity | SALI   |
|-------------------------------------------------------------------------------------|-------------------------------------------------------------------------------------|------|-------|------------|------------|------------|----------------|--------|
| 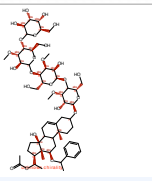   |    | N802 | N698  | 0.96995    | 7.5        | 5.6999998  | 1.8            | 59.904 |
|    |    | N544 | N836  | 0.92215    | 3.5        | 8.1000004  | 4.6            | 59.087 |
|    |    | N645 | N926  | 0.90311    | 4.9000001  | 10.6       | 5.7            | 58.832 |
|    |    | N485 | N741  | 0.94027    | 2.6438484  | 6.1277084  | 3.4839         | 58.329 |
|    |    | N808 | N972  | 0.89839    | 7.6999998  | 13.6       | 5.9            | 58.064 |
|   |   | N705 | N165  | 0.90236    | 5.8000002  | 0.14       | 5.66           | 57.97  |
|  |  | N364 | N639  | 0.93904    | 1.3099999  | 4.8000002  | 3.49           | 57.247 |
|  |  | N295 | N718  | 0.90645    | 0.6999999  | 6          | 5.3            | 56.654 |
|  |  | N719 | N295  | 0.90332    | 6          | 0.6999999  | 5.3            | 54.819 |
|  |  | N364 | N628  | 0.93878    | 1.3099999  | 4.645926   | 3.3359         | 54.488 |
|  |  | N763 | N1008 | 0.81067    | 6.5999999  | 16.9       | 10.3           | 54.403 |

| Structure 1                                                                         | Structure 2                                                                         | ID 1 | ID 2 | Similarity | Activity 1 | Activity 2 | Delta Activity | SALI   |
|-------------------------------------------------------------------------------------|-------------------------------------------------------------------------------------|------|------|------------|------------|------------|----------------|--------|
| 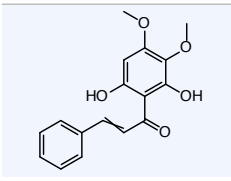   |    | N471 | N876 | 0.86791    | 2.4000001  | 9.5        | 7.1            | 53.751 |
|    |    | N362 | N794 | 0.88885    | 1.3        | 7.25       | 5.95           | 53.53  |
|    |    | N179 | N847 | 0.84045    | 0.1800000  | 8.5167503  | 8.3368         | 52.251 |
|    |    | N633 | N117 | 0.90963    | 4.6999998  | 0.0234999  | 4.6765         | 51.75  |
|   |   | N89  | N785 | 0.862      | 0.0029     | 7.0999999  | 7.0971         | 51.428 |
|  |  | N872 | N346 | 0.84089    | 9.1999998  | 1.1        | 8.1            | 50.907 |
|  |  | N442 | N864 | 0.85706    | 2          | 9          | 7              | 48.973 |
|  |  | N361 | N853 | 0.85025    | 1.3        | 8.6000004  | 7.3            | 48.748 |
|  |  | N382 | N701 | 0.91238    | 1.4920259  | 5.752852   | 4.2608         | 48.631 |
|  |  | N441 | N545 | 0.96914    | 2          | 3.5        | 1.5            | 48.613 |
|  |  | N795 | N320 | 0.86861    | 7.3000002  | 0.9599999  | 6.34           | 48.253 |

| Structure 1                                                                         | Structure 2                                                                         | ID 1 | ID 2 | Similarity | Activity 1 | Activity 2 | Delta Activity | SALI   |
|-------------------------------------------------------------------------------------|-------------------------------------------------------------------------------------|------|------|------------|------------|------------|----------------|--------|
| 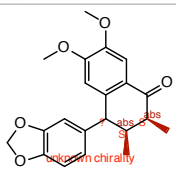   |    | N205 | N904 | 0.79546    | 0.25999999 | 10.100662  | 9.8407         | 48.111 |
|    |    | N795 | N326 | 0.86861    | 7.3000002  | 1          | 6.3            | 47.949 |
|    |    | N364 | N847 | 0.84883    | 1.3099999  | 8.5167503  | 7.2068         | 47.673 |
|    |    | N382 | N682 | 0.91712    | 1.4920259  | 5.4273667  | 3.9353         | 47.482 |
|    |    | N722 | N295 | 0.88707    | 6          | 0.69999999 | 5.3            | 46.93  |
|   |   | N478 | N783 | 0.90377    | 2.5537214  | 7.0650177  | 4.5113         | 46.882 |
|  |  | N794 | N998 | 0.81324    | 7.25       | 16         | 8.75           | 46.851 |
|  |  | N123 | N851 | 0.8152     | 0.03900000 | 8.6000004  | 8.561          | 46.325 |
|  |  | N203 | N545 | 0.92999    | 0.25999999 | 3.5        | 3.24           | 46.277 |
|  |  | N789 | N548 | 0.92074    | 7.1999998  | 3.533287   | 3.6667         | 46.262 |
|  |  | N883 | N802 | 0.95452    | 9.6000004  | 7.5        | 2.1            | 46.178 |

| Structure 1                                                                         | Structure 2                                                                         | ID 1 | ID 2 | Similarity | Activity 1 | Activity 2 | Delta Activity | SALI   |
|-------------------------------------------------------------------------------------|-------------------------------------------------------------------------------------|------|------|------------|------------|------------|----------------|--------|
| 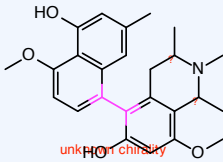   |    | N368 | N742 | 0.89329    | 1.3202387  | 6.1999998  | 4.8798         | 45.727 |
|    |    | N340 | N749 | 0.88255    | 1.04       | 6.4000001  | 5.36           | 45.636 |
|    |    | N675 | N295 | 0.89965    | 5.2238231  | 0.6999999  | 4.5238         | 45.081 |
|    |    | N883 | N698 | 0.9132     | 9.6000004  | 5.6999998  | 3.9            | 44.932 |
|    |    | N223 | N826 | 0.82831    | 0.3199999  | 8          | 7.68           | 44.732 |
|  |  | N622 | N964 | 0.81653    | 4.5        | 12.7       | 8.2            | 44.693 |
|  |  | N310 | N529 | 0.94314    | 0.8000000  | 13.3       | 2.5            | 43.966 |
|  |  | N589 | N743 | 0.95062    | 4.0999999  | 6.2685881  | 2.1686         | 43.919 |
|  |  | N213 | N400 | 0.971      | 0.28       | 1.5423753  | 1.2624         | 43.529 |
|  |  | N307 | N838 | 0.82892    | 0.8000000  | 8.1999998  | 7.4            | 43.254 |
|  |  | N187 | N842 | 0.81211    | 0.2        | 8.3000002  | 8.1            | 43.111 |

| Structure 1                                                                                              | Structure 2                                                                                              | ID 1 | ID 2 | Similarity | Activity 1 | Activity 2 | Delta Activity | SALI   |
|----------------------------------------------------------------------------------------------------------|----------------------------------------------------------------------------------------------------------|------|------|------------|------------|------------|----------------|--------|
| 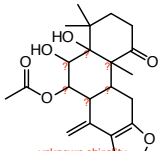<br>unknown chirality   | <br>unknown chirality   | N705 | N328 | 0.8886     | 5.8000002  | 1          | 4.8            | 43.087 |
|                         |                         | N218 | N861 | 0.79964    | 0.3000000  | 8.8999996  | 8.6            | 42.922 |
| <br>unknown chirality   | <br>unknown chirality   | N550 | N789 | 0.91556    | 3.5999999  | 7.1999998  | 3.6            | 42.634 |
|                         |                         | N852 | N957 | 0.91248    | 8.6000004  | 12.3       | 3.7            | 42.278 |
| <br>unknown chirality   | <br>unknown chirality   | N88  | N785 | 0.83121    | 0.0023000  | 7.0999999  | 7.0977         | 42.052 |
|                        |                        | N858 | N160 | 0.79546    | 8.6999998  | 0.12       | 8.58           | 41.948 |
|                       |                       | N448 | N746 | 0.89795    | 2.0665154  | 6.3000002  | 4.2335         | 41.483 |
|                       | <br>this enantiomer   | N371 | N879 | 0.80199    | 1.37       | 9.5799999  | 8.21           | 41.463 |
|                       |                       | N539 | N882 | 0.849      | 3.4000001  | 9.6000004  | 6.2            | 41.06  |
| <br>unknown chirality | <br>unknown chirality | N235 | N742 | 0.85745    | 0.3558477  | 6.1999998  | 5.8442         | 40.998 |
| <br>unknown chirality | <br>unknown chirality | N385 | N886 | 0.79952    | 1.5        | 9.6999998  | 8.2            | 40.902 |

| Structure 1                                                                         | Structure 2                                                                         | ID 1 | ID 2 | Similarity | Activity 1 | Activity 2 | Delta Activity | SALI   |
|-------------------------------------------------------------------------------------|-------------------------------------------------------------------------------------|------|------|------------|------------|------------|----------------|--------|
| 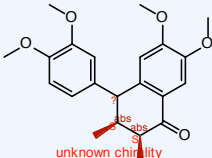   |    | N223 | N842 | 0.80473    | 0.31999999 | 8.3000002  | 7.98           | 40.866 |
|    |    | N363 | N869 | 0.80879    | 1.3099999  | 9.1000004  | 7.79           | 40.742 |
|    |    | N235 | N605 | 0.90055    | 0.3558477  | 4.4000001  | 4.0442         | 40.667 |
|    |    | N281 | N821 | 0.82039    | 0.62       | 7.9000001  | 7.28           | 40.532 |
|    |    | N662 | N235 | 0.88503    | 5          | 0.3558477  | 4.6442         | 40.394 |
|  |  | N381 | N647 | 0.91351    | 1.4714427  | 4.9122138  | 3.4408         | 39.781 |
|  |  | N254 | N665 | 0.88355    | 0.4743721  | 5.0829086  | 4.6085         | 39.574 |
|  |  | N282 | N826 | 0.81337    | 0.63       | 8          | 7.37           | 39.489 |
|  |  | N886 | N991 | 0.85804    | 9.6999998  | 15.3       | 5.6            | 39.448 |
|  |  | N779 | N957 | 0.86564    | 7          | 12.3       | 5.3            | 39.445 |
|  |  | N763 | N937 | 0.88831    | 6.5999999  | 11         | 4.4            | 39.395 |

| Structure 1                                                                         | Structure 2                                                                         | ID 1 | ID 2 | Similarity | Activity 1 | Activity 2 | Delta Activity | SALI   |
|-------------------------------------------------------------------------------------|-------------------------------------------------------------------------------------|------|------|------------|------------|------------|----------------|--------|
| 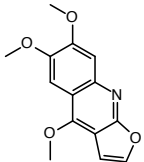   |    | N511 | N874 | 0.83981    | 3          | 9.3000002  | 6.3            | 39.329 |
|    |    | N98  | N482 | 0.93414    | 0.0108     | 2.5999999  | 2.5892         | 39.313 |
|    |    | N282 | N842 | 0.80473    | 0.63       | 8.3000002  | 7.67           | 39.279 |
|    |    | N197 | N705 | 0.85787    | 0.2399999  | 5.8000002  | 5.56           | 39.118 |
|    |    | N266 | N742 | 0.85465    | 0.5286225  | 6.1999998  | 5.6714         | 39.019 |
|   |   | N310 | N692 | 0.87695    | 0.8000000  | 5.5999999  | 4.8            | 39.008 |
|  |  | N187 | N826 | 0.7983     | 0.2        | 8          | 7.8            | 38.671 |
|  |  | N589 | N720 | 0.95062    | 4.0999999  | 6          | 1.9            | 38.48  |
|  |  | N355 | N848 | 0.80737    | 1.2        | 8.5500002  | 7.35           | 38.156 |
|  |  | N368 | N665 | 0.90109    | 1.3202387  | 5.0829086  | 3.7627         | 38.043 |
|  |  | N203 | N378 | 0.96993    | 0.2599999  | 1.4        | 1.14           | 37.914 |



| Structure 1                                                                                              | Structure 2                                                                                              | ID 1 | ID 2 | Similarity | Activity 1 | Activity 2 | Delta Activity | SALI   |
|----------------------------------------------------------------------------------------------------------|----------------------------------------------------------------------------------------------------------|------|------|------------|------------|------------|----------------|--------|
| 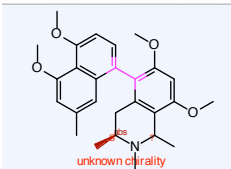<br>unknown chirality   | <br>unknown chirality   | N605 | N742 | 0.95243    | 4.4000001  | 6.1999998  | 1.8            | 37.836 |
| <br>unknown chirality   | <br>unknown chirality   | N884 | N963 | 0.91928    | 9.6700001  | 12.7       | 3.03           | 37.538 |
| <br>racemate            | <br>racemate            | N853 | N921 | 0.94883    | 8.6000004  | 10.5       | 1.9            | 37.132 |
| <br>unknown chirality   | <br>unknown chirality   | N638 | N864 | 0.88589    | 4.7674356  | 9          | 4.2326         | 37.092 |
| <br>racemate            | <br>racemate            | N737 | N972 | 0.79546    | 6.0999999  | 13.6       | 7.5            | 36.668 |
| <br>unknown chirality  | <br>racemate           | N418 | N582 | 0.93686    | 1.7        | 4          | 2.3            | 36.428 |
| <br>unknown chirality | <br>unknown chirality | N345 | N770 | 0.84296    | 1.1        | 6.8000002  | 5.7            | 36.297 |
| <br>unknown chirality | <br>unknown chirality | N264 | N609 | 0.89039    | 0.50926256 | 4.4819884  | 3.9727         | 36.244 |
| <br>unknown chirality | <br>unknown chirality | N218 | N738 | 0.83921    | 0.3000000  | 6.0999999  | 5.8            | 36.072 |
| <br>unknown chirality | <br>unknown chirality | N492 | N705 | 0.91934    | 2.9000001  | 5.8000002  | 2.9            | 35.955 |
| <br>unknown chirality | <br>unknown chirality | N837 | N980 | 0.81814    | 8.1999998  | 14.7       | 6.5            | 35.741 |

| Structure 1                                                                         | Structure 2                                                                         | ID 1 | ID 2 | Similarity | Activity 1 | Activity 2 | Delta Activity | SALI   |
|-------------------------------------------------------------------------------------|-------------------------------------------------------------------------------------|------|------|------------|------------|------------|----------------|--------|
| 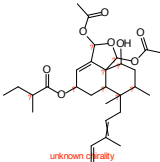   |    | N281 | N716 | 0.84849    | 0.62       | 6          | 5.38           | 35.509 |
|    |    | N676 | N869 | 0.89277    | 5.3000002  | 9.1000004  | 3.8            | 35.437 |
|    |    | N320 | N734 | 0.85706    | 0.95999998 | 6          | 5.04           | 35.26  |
|    |    | N448 | N743 | 0.8808     | 2.0665154  | 6.2685881  | 4.2021         | 35.251 |
|    |    | N681 | N230 | 0.85645    | 5.4000001  | 0.3435565  | 5.0564         | 35.224 |
|   |   | N693 | N910 | 0.86621    | 5.5999999  | 10.3       | 4.7            | 35.131 |
|  |  | N573 | N869 | 0.85143    | 3.9000001  | 9.1000004  | 5.2            | 34.999 |
|  |  | N326 | N734 | 0.85706    | 1          | 6          | 5              | 34.981 |
|  |  | N99  | N780 | 0.80002    | 0.0109     | 7          | 6.9891         | 34.948 |
|  |  | N544 | N636 | 0.96563    | 3.5        | 4.6999998  | 1.2            | 34.909 |
|  |  | N160 | N773 | 0.80547    | 0.12       | 6.9000001  | 6.78           | 34.853 |

| Structure 1                                                                                              | Structure 2                                                                                              | ID 1 | ID 2 | Similarity | Activity 1 | Activity 2 | Delta Activity | SALI   |
|----------------------------------------------------------------------------------------------------------|----------------------------------------------------------------------------------------------------------|------|------|------------|------------|------------|----------------|--------|
| 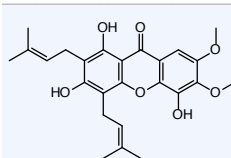                        |                         | N362 | N784 | 0.83409    | 1.3        | 7.0673671  | 5.7674         | 34.761 |
| <br>unknown chirality   | <br>unknown chirality   | N230 | N742 | 0.8305     | 0.3435565  | 6.1999998  | 5.8564         | 34.552 |
| <br>unknown chirality   | <br>unknown chirality   | N136 | N681 | 0.84324    | 0.0632496  | 5.4000001  | 5.3368         | 34.044 |
|                         |                         | N448 | N720 | 0.88352    | 2.0665154  | 6          | 3.9335         | 33.77  |
|                         |                         | N524 | N746 | 0.9091     | 3.2350938  | 6.3000002  | 3.0649         | 33.716 |
| <br>racemate           | <br>racemate           | N639 | N847 | 0.8896     | 4.8000002  | 8.5167503  | 3.7168         | 33.666 |
| <br>unknown chirality | <br>unknown chirality | N191 | N609 | 0.87306    | 0.2135617  | 4.4819884  | 4.2684         | 33.627 |
| <br>racemate          | <br>racemate          | N628 | N847 | 0.88448    | 4.645926   | 8.5167503  | 3.8708         | 33.507 |
| <br>unknown chirality | <br>unknown chirality | N356 | N742 | 0.85291    | 1.2760671  | 6.1999998  | 4.9239         | 33.475 |
| <br>unknown chirality | <br>unknown chirality | N851 | N431 | 0.79789    | 8.6000004  | 1.841624   | 6.7584         | 33.44  |
|                       |                       | N160 | N749 | 0.81211    | 0.12       | 6.4000001  | 6.28           | 33.425 |

| Structure 1                                                                                              | Structure 2                                                                                              | ID 1 | ID 2 | Similarity | Activity 1 | Activity 2 | Delta Activity | SALI   |
|----------------------------------------------------------------------------------------------------------|----------------------------------------------------------------------------------------------------------|------|------|------------|------------|------------|----------------|--------|
| 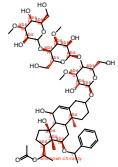                        |                         | N757 | N799 | 0.97307    | 6.5        | 7.4000001  | 0.9            | 33.414 |
| <br>unknown chirality   | <br>this enantiomer     | N457 | N651 | 0.91599    | 2.2        | 5          | 2.8            | 33.327 |
|                         |                         | N210 | N702 | 0.83324    | 0.27000001 | 5.79       | 5.52           | 33.102 |
|                         |                         | N746 | N295 | 0.83055    | 6.3000002  | 0.6999999  | 5.6            | 33.048 |
| <br>unknown chirality   | <br>unknown chirality   | N407 | N705 | 0.87267    | 1.6        | 5.8000002  | 4.2            | 32.985 |
|                        |                        | N617 | N749 | 0.94215    | 4.5        | 6.4000001  | 1.9            | 32.844 |
| <br>unknown chirality | <br>unknown chirality | N750 | N413 | 0.85508    | 6.4000001  | 1.6503562  | 4.7496         | 32.775 |
| <br>unknown chirality | <br>unknown chirality | N646 | N266 | 0.86621    | 4.9079509  | 0.52862251 | 4.3793         | 32.734 |
| <br>racemate          | <br>racemate          | N206 | N545 | 0.90073    | 0.2599999  | 3.5        | 3.24           | 32.637 |
| <br>racemate          | <br>racemate          | N220 | N441 | 0.94777    | 0.30000001 | 2          | 1.7            | 32.546 |
| <br>unknown chirality | <br>unknown chirality | N254 | N681 | 0.84666    | 0.4743721  | 5.4000001  | 4.9256         | 32.122 |

| Structure 1                                                                         | Structure 2                                                                         | ID 1 | ID 2 | Similarity | Activity 1 | Activity 2 | Delta Activity | SALI   |
|-------------------------------------------------------------------------------------|-------------------------------------------------------------------------------------|------|------|------------|------------|------------|----------------|--------|
|    |    | N281 | N673 | 0.85675    | 0.62       | 5.1999998  | 4.58           | 31.972 |
|    |    | N103 | N646 | 0.8466     | 0.0127072  | 4.9079509  | 4.8952         | 31.912 |
|    |    | N339 | N515 | 0.93686    | 1.0352538  | 3.0363095  | 2.0011         | 31.693 |
|    |    | N699 | N926 | 0.84495    | 5.6999998  | 10.6       | 4.9            | 31.603 |
|    |    | N289 | N705 | 0.83667    | 0.64999998 | 5.8000002  | 5.15           | 31.531 |
|   |   | N291 | N773 | 0.80121    | 0.66000000 | 6.9000001  | 6.24           | 31.39  |
|  |  | N281 | N686 | 0.84393    | 0.62       | 5.5        | 4.88           | 31.268 |
|  |  | N341 | N534 | 0.92342    | 1.04       | 3.3900001  | 2.35           | 30.687 |
|  |  | N488 | N658 | 0.92395    | 2.7        | 5          | 2.3            | 30.243 |
|  |  | N179 | N639 | 0.84651    | 0.18000000 | 4.8000002  | 4.62           | 30.099 |
|  |  | N757 | N883 | 0.89699    | 6.5        | 9.6000004  | 3.1            | 30.094 |

| Structure 1                                                                         | Structure 2                                                                         | ID 1 | ID 2 | Similarity | Activity 1 | Activity 2 | Delta Activity | SALI   |
|-------------------------------------------------------------------------------------|-------------------------------------------------------------------------------------|------|------|------------|------------|------------|----------------|--------|
| 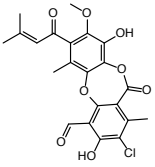   |    | N792 | N955 | 0.83335    | 7.1999998  | 12.2       | 5              | 30.002 |
|    |    | N784 | N965 | 0.807      | 7.0673671  | 12.8       | 5.7326         | 29.703 |
|    |    | N605 | N864 | 0.84495    | 4.4000001  | 9          | 4.6            | 29.668 |
|    |    | N322 | N734 | 0.83026    | 0.9703220  | 6          | 5.0297         | 29.632 |
|    |    | N604 | N235 | 0.86238    | 4.4000001  | 0.3558477  | 4.0442         | 29.387 |
|   |   | N360 | N729 | 0.83822    | 1.3        | 6          | 4.7            | 29.051 |
|  |  | N381 | N688 | 0.85929    | 1.4714427  | 5.5559001  | 4.0845         | 29.028 |
|  |  | N382 | N581 | 0.91348    | 1.4920259  | 4          | 2.508          | 28.986 |
|  |  | N327 | N705 | 0.83409    | 1          | 5.8000002  | 4.8            | 28.93  |
|  |  | N524 | N784 | 0.86599    | 3.2350938  | 7.0673671  | 3.8323         | 28.596 |
|  |  | N442 | N605 | 0.91522    | 2          | 4.4000001  | 2.4            | 28.308 |

| Structure 1                                                                                              | Structure 2                                                                                              | ID 1 | ID 2 | Similarity | Activity 1 | Activity 2 | Delta Activity | SALI   |
|----------------------------------------------------------------------------------------------------------|----------------------------------------------------------------------------------------------------------|------|------|------------|------------|------------|----------------|--------|
| 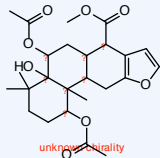<br>unknown chirality   | <br>unknown chirality   | N754 | N407 | 0.82657    | 6.5        | 1.6        | 4.9            | 28.253 |
| <br>unknown chirality   | <br>unknown chirality   | N756 | N855 | 0.92206    | 6.5        | 8.6999998  | 2.2            | 28.228 |
| <br>unknown chirality   | <br>unknown chirality   | N750 | N382 | 0.82475    | 6.4000001  | 1.4920259  | 4.908          | 28.006 |
| <br>unknown chirality   | <br>unknown chirality   | N681 | N266 | 0.82465    | 5.4000001  | 0.52862251 | 4.8714         | 27.781 |
| <br>unknown chirality   | <br>unknown chirality   | N234 | N609 | 0.85036    | 0.35299999 | 4.4819884  | 4.129          | 27.592 |
| <br>unknown chirality | <br>unknown chirality | N448 | N729 | 0.85706    | 2.0665154  | 6          | 3.9335         | 27.519 |
| <br>unknown chirality | <br>unknown chirality | N636 | N836 | 0.87525    | 4.6999998  | 8.1000004  | 3.4            | 27.255 |
| <br>racemate          | <br>racemate          | N267 | N562 | 0.88416    | 0.55000001 | 3.7        | 3.15           | 27.192 |
| <br>racemate          | <br>racemate          | N773 | N890 | 0.88963    | 6.9000001  | 9.8999996  | 3              | 27.182 |
| <br>unknown chirality | <br>unknown chirality | N442 | N742 | 0.8434     | 2          | 6.1999998  | 4.2            | 26.821 |
| <br>unknown chirality | <br>unknown chirality | N327 | N492 | 0.92913    | 1          | 2.9000001  | 1.9            | 26.811 |

| Structure 1                                                                         | Structure 2                                                                         | ID 1 | ID 2 | Similarity | Activity 1 | Activity 2 | Delta Activity | SALI   |
|-------------------------------------------------------------------------------------|-------------------------------------------------------------------------------------|------|------|------------|------------|------------|----------------|--------|
| 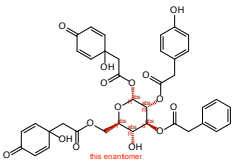   |    | N305 | N384 | 0.97356    | 0.8000000  | 1.5        | 0.7            | 26.476 |
|    |    | N304 | N384 | 0.97356    | 0.8000000  | 1.5        | 0.7            | 26.476 |
|    |    | N136 | N665 | 0.80862    | 0.0632496  | 5.0829086  | 5.0197         | 26.229 |
|    |    | N772 | N562 | 0.87793    | 6.9000001  | 3.7        | 3.2            | 26.215 |
|   |   | N771 | N935 | 0.84268    | 6.8000002  | 10.91      | 4.11           | 26.126 |
|  |  | N662 | N230 | 0.82079    | 5          | 0.3435565  | 4.6564         | 25.984 |
|  |  | N545 | N255 | 0.88322    | 3.5        | 0.4799999  | 3.02           | 25.86  |
|  |  | N719 | N340 | 0.80698    | 6          | 1.04       | 4.96           | 25.697 |
|  |  | N201 | N638 | 0.82404    | 0.2466175  | 4.7674356  | 4.5208         | 25.692 |
|  |  | N418 | N661 | 0.87057    | 1.7        | 5          | 3.3            | 25.497 |
|  |  | N787 | N925 | 0.86606    | 7.1953335  | 10.596756  | 3.4014         | 25.395 |



| Structure 1                                                                                              | Structure 2                                                                                              | ID 1 | ID 2 | Similarity | Activity 1 | Activity 2 | Delta Activity | SALI   |
|----------------------------------------------------------------------------------------------------------|----------------------------------------------------------------------------------------------------------|------|------|------------|------------|------------|----------------|--------|
| 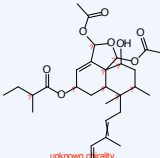<br>unknown chirality   | <br>unknown chirality   | N281 | N629 | 0.84046    | 0.62       | 4.6599998  | 4.04           | 25.323 |
| <br>unknown chirality   | <br>unknown chirality   | N681 | N356 | 0.83667    | 5.4000001  | 1.2760671  | 4.1239         | 25.249 |
| <br>racemate            | <br>racemate            | N179 | N628 | 0.82215    | 0.1800000  | 4.645926   | 4.4659         | 25.11  |
| <br>unknown chirality   | <br>unknown chirality   | N640 | N864 | 0.83232    | 4.8000002  | 9          | 4.2            | 25.048 |
| <br>unknown chirality   | <br>unknown chirality   | N264 | N527 | 0.88846    | 0.5092625  | 3.2876763  | 2.7784         | 24.91  |
| <br>unknown chirality  | <br>unknown chirality  | N646 | N864 | 0.83549    | 4.9079509  | 9          | 4.092          | 24.874 |
| <br>racemate          | <br>racemate          | N267 | N364 | 0.96944    | 0.5500000  | 1.3099999  | 0.76           | 24.87  |
| <br>racemate          | <br>racemate          | N203 | N441 | 0.92999    | 0.2599999  | 2          | 1.74           | 24.852 |
| <br>unknown chirality | <br>unknown chirality | N798 | N527 | 0.83825    | 7.3045239  | 3.2876763  | 4.0168         | 24.834 |
| <br>racemate          | <br>racemate          | N483 | N759 | 0.83865    | 2.5999999  | 6.5999999  | 4              | 24.791 |
| <br>unknown chirality | <br>unknown chirality | N492 | N165 | 0.8886     | 2.9000001  | 0.14       | 2.76           | 24.775 |

| Structure 1                                                                         | Structure 2                                                                         | ID 1 | ID 2 | Similarity | Activity 1 | Activity 2 | Delta Activity | SALI   |
|-------------------------------------------------------------------------------------|-------------------------------------------------------------------------------------|------|------|------------|------------|------------|----------------|--------|
| 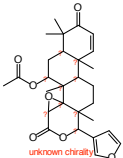   |    | N382 | N519 | 0.93434    | 1.4920259  | 3.0999999  | 1.608          | 24.491 |
|    |    | N230 | N605 | 0.83232    | 0.3435565  | 4.4000001  | 4.0564         | 24.192 |
|    |    | N382 | N591 | 0.89184    | 1.4920259  | 4.0999999  | 2.608          | 24.112 |
|    |    | N524 | N729 | 0.88499    | 3.2350938  | 6          | 2.7649         | 24.04  |
|    |    | N448 | N722 | 0.83633    | 2.0665154  | 6          | 3.9335         | 24.033 |
|   |   | N609 | N347 | 0.85925    | 4.4819884  | 1.1        | 3.382          | 24.029 |
|  |  | N197 | N492 | 0.88885    | 0.2399999  | 2.9000001  | 2.66           | 23.931 |
|  |  | N646 | N356 | 0.84819    | 4.9079509  | 1.2760671  | 3.6319         | 23.924 |
|  |  | N758 | N889 | 0.85962    | 6.5999999  | 9.8999996  | 3.3            | 23.507 |
|  |  | N113 | N639 | 0.79653    | 0.02       | 4.8000002  | 4.78           | 23.492 |
|  |  | N362 | N718 | 0.7992     | 1.3        | 6          | 4.7            | 23.406 |

| Structure 1                                                                         | Structure 2                                                                         | ID 1 | ID 2 | Similarity | Activity 1 | Activity 2 | Delta Activity | SALI   |
|-------------------------------------------------------------------------------------|-------------------------------------------------------------------------------------|------|------|------------|------------|------------|----------------|--------|
| 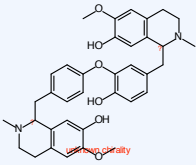   |    | N171 | N357 | 0.95191    | 0.16       | 1.28       | 1.12           | 23.288 |
|    |    | N452 | N759 | 0.80579    | 2.0999999  | 6.5999999  | 4.5            | 23.17  |
|    |    | N413 | N701 | 0.82278    | 1.6503562  | 5.752852   | 4.1025         | 23.149 |
|    |    | N340 | N672 | 0.81855    | 1.04       | 5.1999998  | 4.16           | 22.927 |
|    |    | N378 | N441 | 0.97381    | 1.4        | 2          | 0.6            | 22.907 |
|   |   | N568 | N165 | 0.83999    | 3.8        | 0.14       | 3.66           | 22.873 |
|  |  | N504 | N746 | 0.85572    | 3          | 6.3000002  | 3.3            | 22.873 |
|  |  | N439 | N150 | 0.91599    | 2          | 0.0979433  | 1.9021         | 22.64  |
|  |  | N662 | N864 | 0.82157    | 5          | 9          | 4              | 22.417 |
|  |  | N750 | N434 | 0.80052    | 6.4000001  | 1.9340975  | 4.4659         | 22.387 |
|  |  | N362 | N575 | 0.8838     | 1.3        | 3.9000001  | 2.6            | 22.376 |

| Structure 1                                                                         | Structure 2                                                                         | ID 1 | ID 2 | Similarity | Activity 1 | Activity 2 | Delta Activity | SALI   |
|-------------------------------------------------------------------------------------|-------------------------------------------------------------------------------------|------|------|------------|------------|------------|----------------|--------|
| 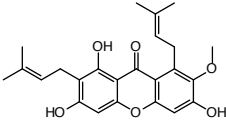   |    | N589 | N295 | 0.84799    | 4.0999999  | 0.6999999  | 3.4            | 22.367 |
|    |    | N98  | N451 | 0.90632    | 0.0108     | 2.0999999  | 2.0892         | 22.303 |
|    |    | N681 | N368 | 0.81661    | 5.4000001  | 1.3202387  | 4.0798         | 22.246 |
|    |    | N179 | N562 | 0.84045    | 0.1800000  | 1.3        | 3.52           | 22.062 |
|    |    | N362 | N675 | 0.82113    | 1.3        | 5.2238231  | 3.9238         | 21.936 |
|   |   | N568 | N197 | 0.8372     | 3.8        | 0.2399999  | 3.56           | 21.867 |
|  |  | N340 | N639 | 0.8275     | 1.04       | 4.8000002  | 3.76           | 21.797 |
|  |  | N671 | N869 | 0.82079    | 5.1999998  | 9.1000004  | 3.9            | 21.763 |
|  |  | N96  | N451 | 0.90399    | 0.0106     | 2.0999999  | 2.0894         | 21.762 |
|  |  | N171 | N527 | 0.85539    | 0.16       | 3.2876763  | 3.1277         | 21.629 |
|  |  | N389 | N142 | 0.93448    | 1.5        | 0.0854246  | 1.4146         | 21.59  |

| Structure 1                                                                         | Structure 2                                                                         | ID 1 | ID 2 | Similarity | Activity 1 | Activity 2 | Delta Activity | SALI   |
|-------------------------------------------------------------------------------------|-------------------------------------------------------------------------------------|------|------|------------|------------|------------|----------------|--------|
| 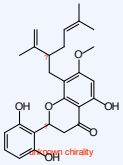   |    | N96  | N482 | 0.87994    | 0.0106     | 2.5999999  | 2.5894         | 21.567 |
|    |    | N604 | N266 | 0.81997    | 4.4000001  | 0.52862251 | 3.8714         | 21.504 |
|    |    | N160 | N617 | 0.79631    | 0.12       | 4.5        | 4.38           | 21.503 |
|    |    | N604 | N681 | 0.95345    | 4.4000001  | 5.4000001  | 1              | 21.48  |
|    |    | N617 | N847 | 0.81211    | 4.5        | 8.5167503  | 4.0168         | 21.379 |
|   |   | N207 | N527 | 0.85861    | 0.26495388 | 3.2876763  | 3.0227         | 21.379 |
|  |  | N662 | N368 | 0.82727    | 5          | 1.3202387  | 3.6798         | 21.304 |
|  |  | N389 | N207 | 0.94195    | 1.5        | 0.26495388 | 1.235          | 21.276 |
|  |  | N171 | N389 | 0.93664    | 0.16       | 1.5        | 1.34           | 21.15  |
|  |  | N602 | N692 | 0.94314    | 4.4000001  | 5.5999999  | 1.2            | 21.104 |
|  |  | N235 | N616 | 0.80354    | 0.3558477  | 4.5        | 4.1442         | 21.094 |

| Structure 1                                                                         | Structure 2                                                                         | ID 1 | ID 2 | Similarity | Activity 1 | Activity 2 | Delta Activity | SALI   |
|-------------------------------------------------------------------------------------|-------------------------------------------------------------------------------------|------|------|------------|------------|------------|----------------|--------|
| 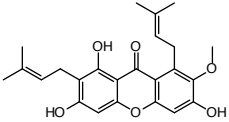   |    | N589 | N746 | 0.89541    | 4.0999999  | 6.3000002  | 2.2            | 21.035 |
|    |    | N580 | N811 | 0.82377    | 4          | 7.6999998  | 3.7            | 20.995 |
|    |    | N799 | N883 | 0.89483    | 7.4000001  | 9.6000004  | 2.2            | 20.919 |
|    |    | N504 | N743 | 0.84309    | 3          | 6.2685881  | 3.2686         | 20.83  |
|    |    | N442 | N616 | 0.87994    | 2          | 4.5        | 2.5            | 20.823 |
|  |   | N555 | N743 | 0.87425    | 3.6544397  | 6.2685881  | 2.6141         | 20.788 |
|  |  | N356 | N665 | 0.81661    | 1.2760671  | 5.0829086  | 3.8068         | 20.758 |
|  |  | N520 | N792 | 0.80214    | 3.0999999  | 7.1999998  | 4.1            | 20.721 |
|  |  | N206 | N378 | 0.94485    | 0.25999999 | 1.4        | 1.14           | 20.672 |
|  |  | N737 | N869 | 0.85465    | 6.0999999  | 9.1000004  | 3              | 20.64  |
|  |  | N241 | N527 | 0.85861    | 0.3709354  | 3.2876763  | 2.9167         | 20.629 |

| Structure 1                                                                         | Structure 2                                                                         | ID 1 | ID 2 | Similarity | Activity 1 | Activity 2 | Delta Activity | SALI   |
|-------------------------------------------------------------------------------------|-------------------------------------------------------------------------------------|------|------|------------|------------|------------|----------------|--------|
| 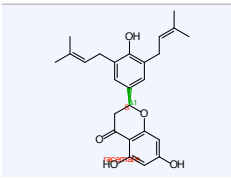   |    | N737 | N808 | 0.92232    | 6.0999999  | 7.6999998  | 1.6            | 20.597 |
|    |    | N589 | N794 | 0.84655    | 4.0999999  | 7.25       | 3.15           | 20.527 |
|    |    | N410 | N515 | 0.9302     | 1.6068573  | 3.0363095  | 1.4295         | 20.481 |
|    |    | N584 | N755 | 0.87793    | 4          | 6.5        | 2.5            | 20.48  |
|   |   | N389 | N176 | 0.93448    | 1.5        | 0.1718350  | 1.3282         | 20.271 |
|  |  | N356 | N605 | 0.84495    | 1.2760671  | 4.4000001  | 3.1239         | 20.148 |
|  |  | N660 | N770 | 0.91037    | 5          | 6.8000002  | 1.8            | 20.082 |
|  |  | N675 | N722 | 0.96116    | 5.2238231  | 6          | 0.77618        | 19.985 |
|  |  | N516 | N578 | 0.95384    | 3.0799999  | 4          | 0.92           | 19.929 |
|  |  | N457 | N655 | 0.85792    | 2.2        | 5          | 2.8            | 19.707 |
|  |  | N748 | N858 | 0.87809    | 6.3000002  | 8.6999998  | 2.4            | 19.687 |

| Structure 1                                                                         | Structure 2                                                                         | ID 1 | ID 2 | Similarity | Activity 1 | Activity 2 | Delta Activity | SALI   |
|-------------------------------------------------------------------------------------|-------------------------------------------------------------------------------------|------|------|------------|------------|------------|----------------|--------|
| 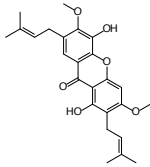   |    | N794 | N547 | 0.80895    | 7.25       | 3.5        | 3.75           | 19.629 |
|    |    | N504 | N729 | 0.8466     | 3          | 6          | 3              | 19.557 |
|    |    | N504 | N720 | 0.84614    | 3          | 6          | 3              | 19.498 |
|    |    | N389 | N241 | 0.94195    | 1.5        | 0.3709354  | 1.1291         | 19.45  |
|    |    | N555 | N746 | 0.86307    | 3.6544397  | 6.3000002  | 2.6456         | 19.321 |
|   |   | N573 | N808 | 0.8031     | 3.9000001  | 7.6999998  | 3.8            | 19.299 |
|  |  | N416 | N678 | 0.80986    | 1.6799999  | 5.3400002  | 3.66           | 19.249 |
|  |  | N448 | N719 | 0.79546    | 2.0665154  | 6          | 3.9335         | 19.231 |
|  |  | N760 | N908 | 0.80736    | 6.5999999  | 10.3       | 3.7            | 19.207 |
|  |  | N722 | N563 | 0.87993    | 6          | 3.7        | 2.3            | 19.155 |
|  |  | N555 | N720 | 0.87716    | 3.6544397  | 6          | 2.3456         | 19.095 |



| Structure 1                                                                         | Structure 2                                                                         | ID 1 | ID 2 | Similarity | Activity 1 | Activity 2 | Delta Activity | SALI   |
|-------------------------------------------------------------------------------------|-------------------------------------------------------------------------------------|------|------|------------|------------|------------|----------------|--------|
| 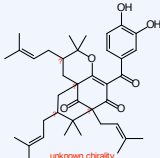   |    | N457 | N654 | 0.85336    | 2.2        | 5          | 2.8            | 19.094 |
|    |    | N799 | N698 | 0.91096    | 7.4000001  | 5.6999998  | 1.7            | 19.093 |
|    |    | N555 | N729 | 0.87695    | 3.6544397  | 6          | 2.3456         | 19.061 |
|    |    | N622 | N836 | 0.81087    | 4.5        | 8.1000004  | 3.6            | 19.035 |
|    |    | N776 | N537 | 0.80815    | 7          | 3.4000001  | 3.6            | 18.765 |
|   |   | N508 | N729 | 0.83999    | 3          | 6          | 3              | 18.749 |
|  |  | N391 | N609 | 0.84036    | 1.5        | 4.4819884  | 2.982          | 18.68  |
|  |  | N300 | N101 | 0.96077    | 0.7436785  | 0.0125     | 0.73118        | 18.638 |
|  |  | N229 | N527 | 0.84167    | 0.3405832  | 3.2876763  | 2.9471         | 18.613 |
|  |  | N457 | N652 | 0.84908    | 2.2        | 5          | 2.8            | 18.553 |
|  |  | N754 | N568 | 0.85405    | 6.5        | 3.8        | 2.7            | 18.499 |

| Structure 1                                                                         | Structure 2                                                                         | ID 1 | ID 2 | Similarity | Activity 1 | Activity 2 | Delta Activity | SALI   |
|-------------------------------------------------------------------------------------|-------------------------------------------------------------------------------------|------|------|------------|------------|------------|----------------|--------|
|    |    | N457 | N656 | 0.84849    | 2.2        | 5          | 2.8            | 18.48  |
|    |    | N225 | N422 | 0.92394    | 0.3292386  | 1.7217735  | 1.3925         | 18.308 |
|    |    | N362 | N547 | 0.87793    | 1.3        | 3.5        | 2.2            | 18.022 |
|    |    | N389 | N191 | 0.92856    | 1.5        | 0.2135617  | 1.2864         | 18.008 |
|    |    | N184 | N537 | 0.82184    | 0.2        | 3.4000001  | 3.2            | 17.962 |
|   |   | N340 | N628 | 0.79878    | 1.04       | 4.645926   | 3.6059         | 17.92  |
|  |  | N340 | N617 | 0.80675    | 1.04       | 4.5        | 3.46           | 17.904 |
|  |  | N595 | N408 | 0.85446    | 4.1999998  | 1.6        | 2.6            | 17.865 |
|  |  | N794 | N575 | 0.81211    | 7.25       | 3.9000001  | 3.35           | 17.83  |
|  |  | N738 | N861 | 0.84278    | 6.0999999  | 8.8999996  | 2.8            | 17.81  |
|  |  | N583 | N14  | 0.829      | 4          | 7.0308681  | 3.0309         | 17.725 |

| Structure 1                                                                         | Structure 2                                                                         | ID 1 | ID 2 | Similarity | Activity 1 | Activity 2 | Delta Activity | SALI   |
|-------------------------------------------------------------------------------------|-------------------------------------------------------------------------------------|------|------|------------|------------|------------|----------------|--------|
| 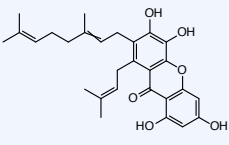   |    | N448 | N675 | 0.82182    | 2.0665154  | 5.2238231  | 3.1573         | 17.72  |
|    |    | N163 | N437 | 0.89438    | 0.13       | 2          | 1.87           | 17.704 |
|    |    | N568 | N328 | 0.84181    | 3.8        | 1          | 2.8            | 17.7   |
|    |    | N368 | N605 | 0.82597    | 1.3202387  | 4.4000001  | 3.0798         | 17.697 |
|    |    | N694 | N465 | 0.81305    | 5.5999999  | 2.3        | 3.3            | 17.652 |
|  |  | N867 | N959 | 0.80929    | 9          | 12.366135  | 3.3661         | 17.651 |
|  |  | N206 | N441 | 0.90073    | 0.25999999 | 2          | 1.74           | 17.527 |
|  |  | N204 | N568 | 0.79793    | 0.25999999 | 3.8        | 3.54           | 17.518 |
|  |  | N842 | N904 | 0.89688    | 8.3000002  | 10.100662  | 1.8007         | 17.461 |
|  |  | N604 | N368 | 0.82204    | 4.4000001  | 1.3202387  | 3.0798         | 17.306 |
|  |  | N96  | N469 | 0.86132    | 0.0106     | 2.4000001  | 2.3894         | 17.229 |

| Structure 1                                                                         | Structure 2                                                                         | ID 1 | ID 2 | Similarity | Activity 1 | Activity 2 | Delta Activity | SALI   |
|-------------------------------------------------------------------------------------|-------------------------------------------------------------------------------------|------|------|------------|------------|------------|----------------|--------|
| 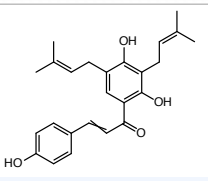   |    | N307 | N573 | 0.81997    | 0.8000000  | 3.9000001  | 3.1            | 17.219 |
|    |    | N277 | N354 | 0.96512    | 0.6000000  | 1.2        | 0.6            | 17.202 |
|    |    | N773 | N672 | 0.90055    | 6.9000001  | 5.1999998  | 1.7            | 17.095 |
|    |    | N519 | N701 | 0.84449    | 3.0999999  | 5.752852   | 2.6529         | 17.059 |
|    |    | N7   | N572 | 0.79944    | 0.5        | 3.9000001  | 3.4            | 16.952 |
|   |   | N890 | N813 | 0.86721    | 9.8999996  | 7.6999998  | 2.2            | 16.567 |
|  |  | N658 | N428 | 0.80663    | 5          | 1.8        | 3.2            | 16.549 |
|  |  | N97  | N300 | 0.95564    | 0.0106239  | 0.7436785  | 10.73305       | 16.526 |
|  |  | N820 | N661 | 0.82347    | 7.9000001  | 5          | 2.9            | 16.428 |
|  |  | N533 | N374 | 0.88278    | 3.3164415  | 1.4        | 1.9164         | 16.349 |
|  |  | N19  | N596 | 0.81636    | 1.21       | 4.1999998  | 2.99           | 16.282 |

| Structure 1                                                                         | Structure 2                                                                         | ID 1 | ID 2 | Similarity | Activity 1 | Activity 2 | Delta Activity | SALI   |
|-------------------------------------------------------------------------------------|-------------------------------------------------------------------------------------|------|------|------------|------------|------------|----------------|--------|
| 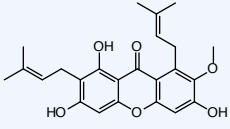   |    | N589 | N732 | 0.88322    | 4.0999999  | 6          | 1.9            | 16.27  |
|    |    | N727 | N770 | 0.95082    | 6          | 6.8000002  | 0.8            | 16.265 |
|    |    | N219 | N378 | 0.93225    | 0.3000000  | 1.4        | 1.1            | 16.236 |
|    |    | N749 | N562 | 0.83272    | 6.4000001  | 3.7        | 2.7            | 16.141 |
|    |    | N604 | N356 | 0.80547    | 4.4000001  | 1.2760671  | 3.1239         | 16.059 |
|   |   | N308 | N568 | 0.81103    | 0.8000000  | 3.8        | 3              | 15.875 |
|  |  | N364 | N562 | 0.84883    | 1.3099999  | 3.7        | 2.39           | 15.81  |
|  |  | N568 | N289 | 0.80031    | 3.8        | 0.6499999  | 3.15           | 15.774 |
|  |  | N524 | N732 | 0.8234     | 3.2350938  | 6          | 2.7649         | 15.656 |
|  |  | N776 | N568 | 0.79546    | 7          | 3.8        | 3.2            | 15.645 |
|  |  | N217 | N498 | 0.82694    | 0.3000000  | 3          | 2.7            | 15.602 |

| Structure 1                                                                         | Structure 2                                                                         | ID 1 | ID 2 | Similarity | Activity 1 | Activity 2 | Delta Activity | SALI   |
|-------------------------------------------------------------------------------------|-------------------------------------------------------------------------------------|------|------|------------|------------|------------|----------------|--------|
| 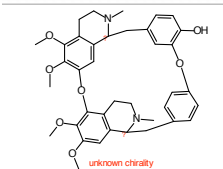   |    | N527 | N347 | 0.85975    | 3.2876763  | 1.1        | 2.1877         | 15.599 |
|    |    | N360 | N555 | 0.8483     | 1.3        | 3.6544397  | 2.3544         | 15.521 |
|    |    | N509 | N731 | 0.80648    | 3          | 6          | 3              | 15.503 |
|    |    | N448 | N671 | 0.79777    | 2.0665154  | 5.1999998  | 3.1335         | 15.495 |
|    |    | N756 | N865 | 0.83844    | 6.5        | 9          | 2.5            | 15.474 |
|   |   | N360 | N508 | 0.89009    | 1.3        | 3          | 1.7            | 15.467 |
|  |  | N404 | N565 | 0.86038    | 1.5891421  | 3.7297204  | 2.1406         | 15.331 |
|  |  | N281 | N552 | 0.80223    | 0.62       | 3.5999999  | 2.98           | 15.068 |
|  |  | N773 | N617 | 0.8403     | 6.9000001  | 4.5        | 2.4            | 15.029 |
|  |  | N547 | N575 | 0.97319    | 3.5        | 3.9000001  | 0.4            | 14.918 |
|  |  | N844 | N941 | 0.80484    | 8.3999996  | 11.3       | 2.9            | 14.86  |

| Structure 1 | Structure 2 | ID 1 | ID 2 | Similarity | Activity 1 | Activity 2 | Delta Activity | SALI   |
|-------------|-------------|------|------|------------|------------|------------|----------------|--------|
|             |             | N676 | N808 | 0.83815    | 5.3000002  | 7.6999998  | 2.4            | 14.828 |
|             |             | N98  | N469 | 0.83885    | 0.0108     | 2.4000001  | 2.3892         | 14.826 |
|             |             | N563 | N295 | 0.79653    | 3.7        | 0.6999999  | 3              | 14.744 |
|             |             | N116 | N337 | 0.93165    | 0.0228946  | 1.0286819  | 1.0058         | 14.715 |
|             |             | N589 | N731 | 0.87063    | 4.0999999  | 6          | 1.9            | 14.687 |
|             |             | N289 | N492 | 0.84495    | 0.6499999  | 2.9000001  | 2.25           | 14.512 |
|             |             | N547 | N267 | 0.79603    | 3.5        | 0.5500000  | 12.95          | 14.463 |
|             |             | N568 | N327 | 0.80607    | 3.8        | 1          | 2.8            | 14.439 |
|             |             | N617 | N772 | 0.83096    | 4.5        | 6.9000001  | 2.4            | 14.198 |
|             |             | N712 | N751 | 0.96438    | 5.9000001  | 6.4000001  | 0.5            | 14.035 |
|             |             | N757 | N802 | 0.92865    | 6.5        | 7.5        | 1              | 14.016 |

| Structure 1                                                                                              | Structure 2                                                                                              | ID 1 | ID 2 | Similarity | Activity 1 | Activity 2 | Delta Activity | SALI   |
|----------------------------------------------------------------------------------------------------------|----------------------------------------------------------------------------------------------------------|------|------|------------|------------|------------|----------------|--------|
| <br>unknown chirality   | <br>unknown chirality   | N742 | N864 | 0.79944    | 6.1999998  | 9          | 2.8            | 13.961 |
| <br>unknown chirality   | <br>unknown chirality   | N264 | N347 | 0.95755    | 0.5092625  | 1.1        | 0.59074        | 13.916 |
|                         |                         | N589 | N729 | 0.86107    | 4.0999999  | 6          | 1.9            | 13.676 |
| <br>racemate            | <br>unknown chirality   | N483 | N98  | 0.80997    | 2.5999999  | 0.0108     | 2.5892         | 13.625 |
|                         |                         | N547 | N731 | 0.81639    | 3.5        | 6          | 2.5            | 13.616 |
| <br>unknown chirality  | <br>unknown chirality  | N604 | N442 | 0.82278    | 4.4000001  | 2          | 2.4            | 13.543 |
| <br>unknown chirality | <br>unknown chirality | N389 | N194 | 0.9061     | 1.5        | 0.2307537  | 1.2692         | 13.516 |
| <br>unknown chirality | <br>unknown chirality | N660 | N727 | 0.92547    | 5          | 6          | 1              | 13.417 |
| <br>unknown chirality | <br>unknown chirality | N519 | N682 | 0.82592    | 3.0999999  | 5.4273667  | 2.3274         | 13.37  |
| <br>racemate          | <br>racemate          | N408 | N598 | 0.79853    | 1.6        | 4.29       | 2.69           | 13.352 |
|                       |                       | N729 | N858 | 0.79719    | 6          | 8.6999998  | 2.7            | 13.313 |



| Structure 1 | Structure 2 | ID 1 | ID 2 | Similarity | Activity 1 | Activity 2 | Delta Activity | SALI   |
|-------------|-------------|------|------|------------|------------|------------|----------------|--------|
|             |             | N772 | N847 | 0.87793    | 6.9000001  | 8.5167503  | 1.6168         | 13.244 |
|             |             | N759 | N869 | 0.81103    | 6.5999999  | 9.1000004  | 2.5            | 13.229 |
|             |             | N675 | N563 | 0.88464    | 5.2238231  | 3.7        | 1.5238         | 13.209 |
|             |             | N869 | N756 | 0.8031     | 9.1000004  | 6.5        | 2.6            | 13.205 |
|             |             | N175 | N412 | 0.88897    | 0.17       | 1.63       | 1.46           | 13.15  |
|             |             | N673 | N552 | 0.8776     | 5.1999998  | 3.5999999  | 1.6            | 13.072 |
|             |             | N442 | N235 | 0.87394    | 2          | 0.3558477  | 1.6442         | 13.043 |
|             |             | N391 | N207 | 0.90407    | 1.5        | 0.2649538  | 1.235          | 12.875 |
|             |             | N589 | N718 | 0.85242    | 4.0999999  | 6          | 1.9            | 12.874 |
|             |             | N589 | N722 | 0.85102    | 4.0999999  | 6          | 1.9            | 12.754 |
|             |             | N672 | N617 | 0.94488    | 5.1999998  | 4.5        | 0.7            | 12.701 |

| Structure 1                                                                         | Structure 2                                                                         | ID 1 | ID 2 | Similarity | Activity 1 | Activity 2 | Delta Activity | SALI   |
|-------------------------------------------------------------------------------------|-------------------------------------------------------------------------------------|------|------|------------|------------|------------|----------------|--------|
| 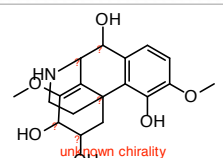   |    | N521 | N620 | 0.88969    | 3.0999999  | 4.5        | 1.4            | 12.692 |
|    |    | N749 | N847 | 0.83272    | 6.4000001  | 8.5167503  | 2.1168         | 12.654 |
|    |    | N443 | N601 | 0.81737    | 2          | 4.3000002  | 2.3            | 12.594 |
|    |    | N541 | N374 | 0.83358    | 3.4909911  | 1.4        | 2.091          | 12.564 |
|    |    | N452 | N483 | 0.95983    | 2.0999999  | 2.5999999  | 0.5            | 12.448 |
|   |   | N366 | N527 | 0.84125    | 1.3158381  | 3.2876763  | 1.9718         | 12.421 |
|  |  | N350 | N207 | 0.92842    | 1.14       | 0.2649538  | 0.87505        | 12.224 |
|  |  | N838 | N766 | 0.87695    | 8.1999998  | 6.6999998  | 1.5            | 12.19  |
|  |  | N633 | N464 | 0.80172    | 4.6999998  | 2.3        | 2.4            | 12.104 |
|  |  | N720 | N784 | 0.91165    | 6          | 7.0673671  | 1.0674         | 12.081 |
|  |  | N529 | N692 | 0.80961    | 3.3        | 5.5999999  | 2.3            | 12.08  |

| Structure 1                                                                                              | Structure 2                                                                                              | ID 1 | ID 2 | Similarity | Activity 1 | Activity 2 | Delta Activity | SALI   |
|----------------------------------------------------------------------------------------------------------|----------------------------------------------------------------------------------------------------------|------|------|------------|------------|------------|----------------|--------|
| 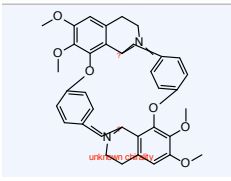<br>unknown chirality   | <br>unknown chirality   | N391 | N241 | 0.90615    | 1.5        | 0.3709354  | 1.1291         | 12.03  |
|                         |                         | N675 | N784 | 0.8461     | 5.2238231  | 7.0673671  | 1.8435         | 11.979 |
|                         |                         | N848 | N935 | 0.80128    | 8.5500002  | 10.91      | 2.36           | 11.876 |
|                         |                         | N360 | N504 | 0.85685    | 1.3        | 3          | 1.7            | 11.876 |
| <br>unknown chirality   | <br>unknown chirality   | N136 | N356 | 0.8973     | 0.0632496  | 1.2760671  | 1.2128         | 11.809 |
| <br>unknown chirality  | <br>unknown chirality  | N568 | N705 | 0.83001    | 3.8        | 5.8000002  | 2              | 11.766 |
| <br>unknown chirality | <br>unknown chirality | N234 | N347 | 0.93641    | 0.3529999  | 1.1        | 0.747          | 11.747 |
|                       |                       | N160 | N291 | 0.95401    | 0.12       | 0.6600000  | 0.54           | 11.741 |
| <br>unknown chirality | <br>unknown chirality | N451 | N482 | 0.95739    | 2.0999999  | 2.5999999  | 0.5            | 11.736 |
| <br>racemate          | <br>unknown chirality | N573 | N737 | 0.81211    | 3.9000001  | 6.0999999  | 2.2            | 11.709 |
| <br>unknown chirality | <br>unknown chirality | N682 | N581 | 0.87714    | 5.4273667  | 4          | 1.4274         | 11.618 |

| Structure 1 | Structure 2 | ID 1 | ID 2 | Similarity | Activity 1 | Activity 2 | Delta Activity | SALI   |
|-------------|-------------|------|------|------------|------------|------------|----------------|--------|
|             |             | N563 | N718 | 0.8016     | 3.7        | 6          | 2.3            | 11.593 |
|             |             | N197 | N327 | 0.93434    | 0.2399999  | 1          | 0.76           | 11.575 |
|             |             | N391 | N527 | 0.84544    | 1.5        | 3.2876763  | 1.7877         | 11.566 |
|             |             | N557 | N685 | 0.84345    | 3.7        | 5.5        | 1.8            | 11.498 |
|             |             | N220 | N378 | 0.90286    | 0.3000000  | 1.4        | 1.1            | 11.323 |
|             |             | N389 | N264 | 0.91233    | 1.5        | 0.5092625  | 0.99074        | 11.301 |
|             |             | N269 | N412 | 0.90523    | 0.5616411  | 1.63       | 1.0684         | 11.273 |
|             |             | N389 | N154 | 0.87581    | 1.5        | 0.1059363  | 1.3941         | 11.225 |
|             |             | N441 | N255 | 0.86427    | 2          | 0.4799999  | 1.52           | 11.199 |
|             |             | N171 | N347 | 0.91543    | 0.16       | 1.1        | 0.94           | 11.115 |
|             |             | N340 | N113 | 0.90817    | 1.04       | 0.02       | 1.02           | 11.107 |

| Structure 1                                                                                              | Structure 2                                                                                              | ID 1 | ID 2 | Similarity | Activity 1 | Activity 2 | Delta Activity | SALI   |
|----------------------------------------------------------------------------------------------------------|----------------------------------------------------------------------------------------------------------|------|------|------------|------------|------------|----------------|--------|
| 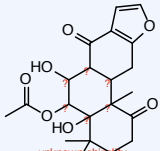<br>unknown chirality   | <br>unknown chirality   | N165 | N328 | 0.92232    | 0.14       | 1          | 0.86           | 11.071 |
| <br>unknown chirality   | <br>unknown chirality   | N519 | N591 | 0.90963    | 3.0999999  | 4.0999999  | 1              | 11.066 |
| <br>unknown chirality   | <br>unknown chirality   | N389 | N234 | 0.8954     | 1.5        | 0.3529999  | 1.147          | 10.965 |
| <br>unknown chirality   | <br>unknown chirality   | N230 | N368 | 0.91076    | 0.3435565  | 1.3202387  | 0.97668        | 10.944 |
| <br>unknown chirality   | <br>unknown chirality   | N675 | N794 | 0.81323    | 5.2238231  | 7.25       | 2.0262         | 10.849 |
| <br>unknown chirality  | <br>unknown chirality  | N717 | N643 | 0.8979     | 6          | 4.9000001  | 1.1            | 10.774 |
| <br>unknown chirality | <br>unknown chirality | N350 | N241 | 0.92842    | 1.14       | 0.3709354  | 0.76906        | 10.744 |
| <br>unknown chirality | <br>unknown chirality | N115 | N337 | 0.90599    | 0.0210509  | 1.0286819  | 1.0076         | 10.718 |
| <br>unknown chirality | <br>unknown chirality | N731 | N575 | 0.80354    | 6          | 3.9000001  | 2.1            | 10.689 |
| <br>this is a dimer   | <br>unknown chirality | N826 | N904 | 0.80316    | 8          | 10.100662  | 2.1007         | 10.672 |
| <br>unknown chirality | <br>unknown chirality | N659 | N770 | 0.83096    | 5          | 6.8000002  | 1.8            | 10.649 |

| Structure 1 | Structure 2 | ID 1 | ID 2 | Similarity | Activity 1 | Activity 2 | Delta Activity | SALI   |
|-------------|-------------|------|------|------------|------------|------------|----------------|--------|
|             |             | N142 | N347 | 0.90462    | 0.0854246  | 1.1        | 1.0146         | 10.637 |
|             |             | N885 | N823 | 0.83868    | 9.6999998  | 8          | 1.7            | 10.538 |
|             |             | N191 | N347 | 0.9154     | 0.2135617  | 1.1        | 0.88644        | 10.478 |
|             |             | N527 | N609 | 0.88569    | 3.2876763  | 4.4819884  | 1.1943         | 10.448 |
|             |             | N703 | N643 | 0.91383    | 5.8000002  | 4.9000001  | 0.9            | 10.444 |
|             |             | N308 | N492 | 0.79793    | 0.8000000  | 2.9000001  | 2.1            | 10.392 |
|             |             | N389 | N177 | 0.87153    | 1.5        | 0.1723969  | 1.3276         | 10.334 |
|             |             | N296 | N465 | 0.84495    | 0.6999999  | 2.3        | 1.6            | 10.319 |
|             |             | N557 | N615 | 0.92232    | 3.7        | 4.5        | 0.8            | 10.298 |
|             |             | N90  | N337 | 0.90064    | 0.0057634  | 1.0286819  | 1.0229         | 10.295 |
|             |             | N701 | N581 | 0.8297     | 5.752852   | 4          | 1.7529         | 10.293 |

| Structure 1                                                                         | Structure 2                                                                         | ID 1 | ID 2 | Similarity | Activity 1 | Activity 2 | Delta Activity | SALI   |
|-------------------------------------------------------------------------------------|-------------------------------------------------------------------------------------|------|------|------------|------------|------------|----------------|--------|
| 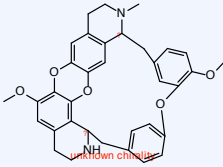   |    | N177 | N347 | 0.90982    | 0.1723969  | 1.1        | 0.9276         | 10.286 |
|    |    | N438 | N184 | 0.82475    | 2          | 0.2        | 1.8            | 10.271 |
|    |    | N571 | N685 | 0.84345    | 3.9000001  | 5.5        | 1.6            | 10.22  |
|    |    | N176 | N347 | 0.90896    | 0.1718350  | 1.1        | 0.92816        | 10.195 |
|    |    | N244 | N450 | 0.83321    | 0.4000000  | 2.0999999  | 1.7            | 10.193 |
|  |  | N235 | N368 | 0.90529    | 0.3558477  | 1.3202387  | 0.96439        | 10.182 |
|  |  | N498 | N586 | 0.90171    | 3          | 4          | 1              | 10.174 |
|  |  | N784 | N732 | 0.89329    | 7.0673671  | 6          | 1.0674         | 10.002 |
|  |  | N562 | N639 | 0.8896     | 3.7        | 4.8000002  | 1.1            | 9.9637 |
|  |  | N223 | N282 | 0.96885    | 0.3199999  | 0.63       | 0.31           | 9.9532 |
|  |  | N616 | N742 | 0.82915    | 4.5        | 6.1999998  | 1.7            | 9.9503 |

| Structure 1                                                                         | Structure 2                                                                         | ID 1 | ID 2 | Similarity | Activity 1 | Activity 2 | Delta Activity | SALI   |
|-------------------------------------------------------------------------------------|-------------------------------------------------------------------------------------|------|------|------------|------------|------------|----------------|--------|
| 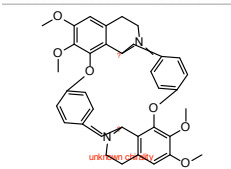   |    | N391 | N191 | 0.86956    | 1.5        | 0.2135617  | 1.2864         | 9.8625 |
|    |    | N266 | N368 | 0.91934    | 0.5286225  | 1.3202387  | 0.79162        | 9.8146 |
|    |    | N540 | N672 | 0.8144     | 3.4000001  | 5.1999998  | 1.8            | 9.6983 |
|    |    | N391 | N142 | 0.85404    | 1.5        | 0.0854246  | 1.4146         | 9.6917 |
|    |    | N391 | N264 | 0.89767    | 1.5        | 0.5092625  | 0.99074        | 9.6821 |
|   |   | N607 | N684 | 0.89473    | 4.4732213  | 5.4799461  | 1.0067         | 9.563  |
|  |  | N388 | N171 | 0.85775    | 1.5        | 0.16       | 1.34           | 9.4197 |
|  |  | N524 | N589 | 0.90735    | 3.2350938  | 4.0999999  | 0.86491        | 9.3354 |
|  |  | N350 | N142 | 0.88699    | 1.14       | 0.0854246  | 1.0546         | 9.3313 |
|  |  | N672 | N749 | 0.87093    | 5.1999998  | 6.4000001  | 1.2            | 9.2974 |
|  |  | N229 | N366 | 0.89465    | 0.3405832  | 1.3158381  | 0.97525        | 9.2577 |



| Structure 1                                                                         | Structure 2                                                                         | ID 1 | ID 2 | Similarity | Activity 1 | Activity 2 | Delta Activity | SALI   |
|-------------------------------------------------------------------------------------|-------------------------------------------------------------------------------------|------|------|------------|------------|------------|----------------|--------|
| 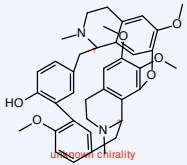   |    | N350 | N191 | 0.89979    | 1.14       | 0.2135617  | 0.92644        | 9.245  |
|    |    | N391 | N176 | 0.85627    | 1.5        | 0.1718350  | 1.3282         | 9.241  |
|    |    | N241 | N142 | 0.9691     | 0.3709354  | 0.0854246  | 0.28551        | 9.2388 |
|    |    | N193 | N439 | 0.80753    | 0.2265998  | 0.2        | 1.7734         | 9.2141 |
|    |    | N191 | N264 | 0.96787    | 0.2135617  | 0.5092625  | 0.2957         | 9.2036 |
|   |   | N207 | N347 | 0.90899    | 0.2649538  | 1.1        | 0.83505        | 9.1751 |
|  |  | N405 | N515 | 0.84304    | 1.6        | 3.0363095  | 1.4363         | 9.1508 |
|  |  | N589 | N675 | 0.87716    | 4.0999999  | 5.2238231  | 1.1238         | 9.1489 |
|  |  | N82  | N337 | 0.88764    | 0.0014583  | 1.0286819  | 1.0272         | 9.1419 |
|  |  | N424 | N225 | 0.84495    | 1.7462807  | 0.3292386  | 1.417          | 9.1393 |
|  |  | N771 | N848 | 0.80737    | 6.8000002  | 8.5500002  | 1.75           | 9.0848 |

| Structure 1                                                                         | Structure 2                                                                         | ID 1 | ID 2 | Similarity | Activity 1 | Activity 2 | Delta Activity | SALI   |
|-------------------------------------------------------------------------------------|-------------------------------------------------------------------------------------|------|------|------------|------------|------------|----------------|--------|
| 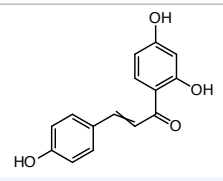   |    | N815 | N882 | 0.80128    | 7.8000002  | 9.6000004  | 1.8            | 9.0582 |
|    |    | N339 | N410 | 0.93686    | 1.0352538  | 1.6068573  | 0.5716         | 9.0532 |
|    |    | N412 | N177 | 0.83668    | 1.63       | 0.1723969  | 1.4576         | 8.9251 |
|    |    | N522 | N651 | 0.79719    | 3.2        | 5          | 1.8            | 8.8752 |
|    |    | N743 | N784 | 0.90892    | 6.2685881  | 7.0673671  | 0.79878        | 8.7704 |
|   |   | N357 | N191 | 0.87832    | 1.28       | 0.2135617  | 1.0664         | 8.7643 |
|  |  | N701 | N591 | 0.81086    | 5.752852   | 4.0999999  | 1.6529         | 8.7386 |
|  |  | N357 | N142 | 0.86294    | 1.28       | 0.0854246  | 1.1946         | 8.7157 |
|  |  | N407 | N197 | 0.8434     | 1.6        | 0.2399999  | 1.36           | 8.6848 |
|  |  | N819 | N772 | 0.8838     | 7.9000001  | 6.9000001  | 1              | 8.6061 |
|  |  | N407 | N165 | 0.83001    | 1.6        | 0.14       | 1.46           | 8.5888 |

| Structure 1                                                                         | Structure 2                                                                         | ID 1 | ID 2 | Similarity | Activity 1 | Activity 2 | Delta Activity | SALI   |
|-------------------------------------------------------------------------------------|-------------------------------------------------------------------------------------|------|------|------------|------------|------------|----------------|--------|
| 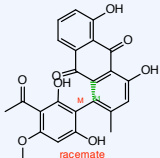   |    | N400 | N297 | 0.90216    | 1.5423753  | 0.7038518  | 0.83852        | 8.57   |
|    |    | N350 | N176 | 0.88699    | 1.14       | 0.1718350  | 0.96816        | 8.5667 |
|    |    | N784 | N731 | 0.87488    | 7.0673671  | 6          | 1.0674         | 8.5308 |
|    |    | N563 | N676 | 0.81244    | 3.7        | 5.3000002  | 1.6            | 8.5305 |
|    |    | N314 | N391 | 0.92871    | 0.8920000  | 1.5        | 0.608          | 8.5283 |
|   |   | N529 | N602 | 0.87087    | 3.3        | 4.4000001  | 1.1            | 8.5188 |
|  |  | N596 | N700 | 0.82381    | 4.1999998  | 5.6999998  | 1.5            | 8.5137 |
|  |  | N95  | N337 | 0.87883    | 0.0088561  | 1.0286819  | 1.0198         | 8.4166 |
|  |  | N241 | N347 | 0.91325    | 0.3709354  | 1.1        | 0.72906        | 8.4041 |
|  |  | N407 | N492 | 0.84495    | 1.6        | 2.9000001  | 1.3            | 8.3844 |
|  |  | N809 | N725 | 0.79719    | 7.6999998  | 6          | 1.7            | 8.3822 |

| Structure 1                                                                                              | Structure 2                                                                                              | ID 1 | ID 2 | Similarity | Activity 1 | Activity 2 | Delta Activity | SALI   |
|----------------------------------------------------------------------------------------------------------|----------------------------------------------------------------------------------------------------------|------|------|------------|------------|------------|----------------|--------|
| 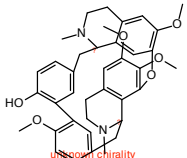<br>unknown chirality   | <br>unknown chirality   | N350 | N264 | 0.92456    | 1.14       | 0.50926256 | 0.63074        | 8.361  |
| <br>unknown chirality   | <br>unknown chirality   | N264 | N207 | 0.97074    | 0.50926256 | 0.26495388 | 0.24431        | 8.3506 |
| <br>unknown chirality   | <br>unknown chirality   | N506 | N373 | 0.80618    | 3          | 1.4        | 1.6            | 8.2552 |
| <br>unknown chirality   | <br>unknown chirality   | N675 | N718 | 0.90541    | 5.2238231  | 6          | 0.77618        | 8.2058 |
| <br>unknown chirality   | <br>unknown chirality   | N562 | N628 | 0.88448    | 3.7        | 4.645926   | 0.94593        | 8.1883 |
| <br>unknown chirality  | <br>unknown chirality  | N347 | N194 | 0.89364    | 1.1        | 0.23075375 | 0.86925        | 8.1725 |
| <br>unknown chirality | <br>unknown chirality | N675 | N743 | 0.87192    | 5.2238231  | 6.2685881  | 1.0448         | 8.1572 |
| <br>unknown chirality | <br>unknown chirality | N402 | N515 | 0.81814    | 1.5672873  | 3.0363095  | 1.469          | 8.0776 |
| <br>unknown chirality | <br>unknown chirality | N615 | N685 | 0.87498    | 4.5        | 5.5        | 1              | 7.9986 |
| <br>unknown chirality | <br>unknown chirality | N413 | N519 | 0.81814    | 1.6503562  | 3.0999999  | 1.4496         | 7.971  |
| <br>unknown chirality | <br>unknown chirality | N187 | N282 | 0.94605    | 0.2        | 0.63       | 0.43           | 7.9708 |

| Structure 1                                                                         | Structure 2                                                                         | ID 1 | ID 2 | Similarity | Activity 1 | Activity 2 | Delta Activity | SALI   |
|-------------------------------------------------------------------------------------|-------------------------------------------------------------------------------------|------|------|------------|------------|------------|----------------|--------|
| 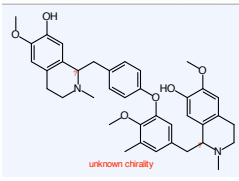   |    | N357 | N176 | 0.86072    | 1.28       | 0.1718350  | 1.1082         | 7.9566 |
|    |    | N264 | N142 | 0.94629    | 0.5092625  | 0.0854246  | 0.42384        | 7.8908 |
|    |    | N665 | N742 | 0.85787    | 5.0829086  | 6.1999998  | 1.1171         | 7.8595 |
|    |    | N601 | N558 | 0.92321    | 4.3000002  | 3.7        | 0.6            | 7.8132 |
|    |    | N808 | N869 | 0.81997    | 7.6999998  | 9.1000004  | 1.4            | 7.7764 |
|   |   | N759 | N671 | 0.81639    | 6.5999999  | 5.1999998  | 1.4            | 7.6248 |
|  |  | N438 | N537 | 0.81601    | 2          | 3.4000001  | 1.4            | 7.6092 |
|  |  | N230 | N356 | 0.87695    | 0.3435565  | 1.2760671  | 0.93251        | 7.5781 |
|  |  | N671 | N737 | 0.88106    | 5.1999998  | 6.0999999  | 0.9            | 7.5671 |
|  |  | N266 | N356 | 0.90109    | 0.5286225  | 1.2760671  | 0.74744        | 7.5571 |
|  |  | N675 | N746 | 0.8559     | 5.2238231  | 6.3000002  | 1.0762         | 7.4681 |

| Structure 1                                                                         | Structure 2                                                                         | ID 1 | ID 2 | Similarity | Activity 1 | Activity 2 | Delta Activity | SALI   |
|-------------------------------------------------------------------------------------|-------------------------------------------------------------------------------------|------|------|------------|------------|------------|----------------|--------|
| 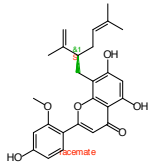   |    | N452 | N470 | 0.95916    | 2.0999999  | 2.4000001  | 0.3            | 7.3457 |
|    |    | N451 | N469 | 0.95916    | 2.0999999  | 2.4000001  | 0.3            | 7.3457 |
|    |    | N357 | N207 | 0.86119    | 1.28       | 0.2649538  | 1.015          | 7.3127 |
|    |    | N720 | N746 | 0.95895    | 6          | 6.3000002  | 0.3            | 7.3083 |
|    |    | N314 | N142 | 0.88871    | 0.8920000  | 0.0854246  | 0.80658        | 7.2475 |
|   |   | N176 | N241 | 0.97237    | 0.1718350  | 0.3709354  | 0.1991         | 7.2056 |
|  |  | N249 | N299 | 0.95824    | 0.4129999  | 0.7138000  | 0.3008         | 7.2031 |
|  |  | N245 | N370 | 0.86752    | 0.4000000  | 1.353928   | 0.95393        | 7.2007 |
|  |  | N792 | N852 | 0.80547    | 7.1999998  | 8.6000004  | 1.4            | 7.1968 |
|  |  | N682 | N591 | 0.81112    | 5.4273667  | 4.0999999  | 1.3274         | 7.0277 |
|  |  | N518 | N417 | 0.80031    | 3.0999999  | 1.7        | 1.4            | 7.0108 |

| Structure 1                                                                         | Structure 2                                                                         | ID 1 | ID 2 | Similarity | Activity 1  | Activity 2 | Delta Activity | SALI   |
|-------------------------------------------------------------------------------------|-------------------------------------------------------------------------------------|------|------|------------|-------------|------------|----------------|--------|
| 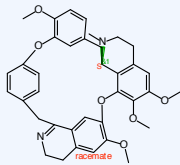   |    | N175 | N393 | 0.80936    | 0.17        | 1.5        | 1.33           | 6.9763 |
|    |    | N568 | N492 | 0.86981    | 3.8         | 2.9000001  | 0.9            | 6.913  |
|    |    | N662 | N742 | 0.82597    | 5           | 6.1999998  | 1.2            | 6.8953 |
|    |    | N647 | N688 | 0.90561    | 4.9122138   | 5.5559001  | 0.64369        | 6.8192 |
|    |    | N729 | N784 | 0.84335    | 6           | 7.0673671  | 1.0674         | 6.8138 |
|   |   | N716 | N629 | 0.80321    | 6           | 4.6599998  | 1.34           | 6.8093 |
|  |  | N139 | N333 | 0.86427    | 0.0790000(1 |            | 0.921          | 6.7855 |
|  |  | N176 | N264 | 0.95005    | 0.1718350(  | 0.5092625( | 0.33743        | 6.7552 |
|  |  | N676 | N737 | 0.88125    | 5.3000002   | 6.0999999  | 0.8            | 6.7371 |
|  |  | N757 | N698 | 0.88111    | 6.5         | 5.6999998  | 0.8            | 6.7288 |
|  |  | N628 | N639 | 0.9771     | 4.645926    | 4.8000002  | 0.15407        | 6.7287 |

| Structure 1                                                                         | Structure 2                                                                         | ID 1 | ID 2 | Similarity | Activity 1 | Activity 2 | Delta Activity | SALI   |
|-------------------------------------------------------------------------------------|-------------------------------------------------------------------------------------|------|------|------------|------------|------------|----------------|--------|
| 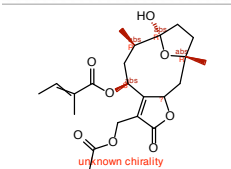   |    | N571 | N615 | 0.9103     | 3.9000001  | 4.5        | 0.6            | 6.6889 |
|    |    | N448 | N524 | 0.82464    | 2.0665154  | 3.2350938  | 1.1686         | 6.6639 |
|    |    | N573 | N671 | 0.80449    | 3.9000001  | 5.1999998  | 1.3            | 6.6492 |
|    |    | N331 | N384 | 0.92452    | 1          | 1.5        | 0.5            | 6.6243 |
|    |    | N234 | N142 | 0.95958    | 0.35299999 | 0.08542469 | 0.26758        | 6.6191 |
|   |   | N314 | N176 | 0.89089    | 0.89200002 | 0.17183509 | 0.72016        | 6.6006 |
|  |  | N357 | N234 | 0.858      | 1.28       | 0.35299999 | 0.927          | 6.5281 |
|  |  | N142 | N207 | 0.97237    | 0.08542469 | 0.26495388 | 0.17953        | 6.4973 |
|  |  | N357 | N241 | 0.85899    | 1.28       | 0.37093544 | 0.90906        | 6.447  |
|  |  | N350 | N194 | 0.8585     | 1.14       | 0.23075377 | 0.90925        | 6.4258 |
|  |  | N803 | N859 | 0.79671    | 7.5        | 8.8000002  | 1.3            | 6.3948 |



| Structure 1                                                                                              | Structure 2                                                                                              | ID 1 | ID 2 | Similarity | Activity 1 | Activity 2 | Delta Activity | SALI   |
|----------------------------------------------------------------------------------------------------------|----------------------------------------------------------------------------------------------------------|------|------|------------|------------|------------|----------------|--------|
| 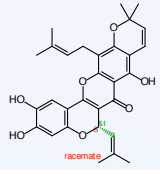<br>racemate            | <br>racemate            | N113 | N364 | 0.79741    | 0.02       | 1.3099999  | 1.29           | 6.3676 |
| <br>unknown chirality   | <br>unknown chirality   | N350 | N234 | 0.8736     | 1.14       | 0.3529999  | 0.787          | 6.2262 |
| <br>unknown chirality   | <br>unknown chirality   | N659 | N727 | 0.83681    | 5          | 6          | 1              | 6.1278 |
| <br>unknown chirality   | <br>unknown chirality   | N357 | N264 | 0.87395    | 1.28       | 0.5092625  | 0.77074        | 6.1147 |
| <br>unknown chirality   | <br>unknown chirality   | N139 | N352 | 0.81619    | 0.0790000  | 1.2        | 1.121          | 6.0988 |
| <br>unknown chirality | <br>unknown chirality | N675 | N720 | 0.87192    | 5.2238231  | 6          | 0.77618        | 6.0601 |
| <br>unknown chirality | <br>unknown chirality | N191 | N241 | 0.97397    | 0.2135617  | 0.3709354  | 0.15737        | 6.046  |
| <br>unknown chirality | <br>unknown chirality | N197 | N328 | 0.87394    | 0.2399999  | 1          | 0.76           | 6.0291 |
| <br>unknown chirality | <br>racemate          | N773 | N813 | 0.86721    | 6.9000001  | 7.6999998  | 0.8            | 6.0245 |
| <br>unknown chirality | <br>unknown chirality | N403 | N445 | 0.92286    | 1.5677412  | 2.0277345  | 0.45999        | 5.9633 |
| <br>unknown chirality | <br>unknown chirality | N136 | N254 | 0.9308     | 0.0632496  | 0.4743721  | 0.41112        | 5.9414 |

| Structure 1                                                                         | Structure 2                                                                         | ID 1 | ID 2 | Similarity | Activity 1 | Activity 2 | Delta Activity | SALI   |
|-------------------------------------------------------------------------------------|-------------------------------------------------------------------------------------|------|------|------------|------------|------------|----------------|--------|
| 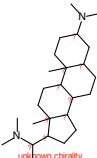   |    | N472 | N543 | 0.81453    | 2.4000001  | 3.5        | 1.1            | 5.9307 |
|    |    | N234 | N314 | 0.90808    | 0.3529999  | 0.8920000  | 0.539          | 5.8635 |
|    |    | N179 | N364 | 0.80719    | 0.1800000  | 1.3099999  | 1.13           | 5.8607 |
|    |    | N133 | N311 | 0.87093    | 0.0541884  | 0.8000000  | 0.74581        | 5.7784 |
|    |    | N235 | N356 | 0.84015    | 0.3558477  | 1.2760671  | 0.92022        | 5.7568 |
|   |   | N200 | N368 | 0.81211    | 0.2453975  | 1.3202387  | 1.0748         | 5.7207 |
|  |  | N504 | N555 | 0.88544    | 3          | 3.6544397  | 0.65444        | 5.7125 |
|  |  | N378 | N255 | 0.83594    | 1.4        | 0.4799999  | 0.92           | 5.6079 |
|  |  | N703 | N717 | 0.96414    | 5.8000002  | 6          | 0.2            | 5.5772 |
|  |  | N449 | N515 | 0.82972    | 2.0883331  | 3.0363095  | 0.94798        | 5.567  |
|  |  | N488 | N428 | 0.83832    | 2.7        | 1.8        | 0.9            | 5.5664 |

| Structure 1                                                                                              | Structure 2                                                                                              | ID 1 | ID 2 | Similarity | Activity 1 | Activity 2 | Delta Activity | SALI   |
|----------------------------------------------------------------------------------------------------------|----------------------------------------------------------------------------------------------------------|------|------|------------|------------|------------|----------------|--------|
| 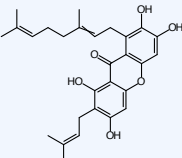                        |                         | N746 | N784 | 0.85836    | 6.3000002  | 7.0673671  | 0.76737        | 5.4177 |
| <br>unknown chirality   | <br>unknown chirality   | N196 | N368 | 0.79793    | 0.23723181 | 1.3202387  | 1.083          | 5.3594 |
| <br>unknown chirality   | <br>unknown chirality   | N241 | N264 | 0.97397    | 0.37093544 | 0.50926256 | 0.13833        | 5.3143 |
| <br>unknown chirality   | <br>unknown chirality   | N339 | N449 | 0.80079    | 1.0352538  | 2.0883331  | 1.0531         | 5.2863 |
| <br>unknown chirality   | <br>unknown chirality   | N407 | N289 | 0.81959    | 1.6        | 0.64999999 | 0.95           | 5.2658 |
| <br>unknown chirality | <br>unknown chirality | N522 | N457 | 0.80912    | 3.2        | 2.2        | 1              | 5.2389 |
| <br>unknown chirality | <br>unknown chirality | N204 | N308 | 0.8956     | 0.25999999 | 0.80000001 | 0.54           | 5.1726 |
| <br>unknown chirality | <br>unknown chirality | N519 | N581 | 0.82585    | 3.0999999  | 4          | 0.9            | 5.168  |
| <br>unknown chirality | <br>unknown chirality | N314 | N154 | 0.84777    | 0.89200002 | 0.10593635 | 0.78606        | 5.1638 |
| <br>unknown chirality | <br>unknown chirality | N197 | N289 | 0.92048    | 0.23999999 | 0.64999999 | 0.41           | 5.1559 |
| <br>unknown chirality | <br>unknown chirality | N327 | N165 | 0.82784    | 1          | 0.14       | 0.86           | 4.9953 |

| Structure 1                                                                                              | Structure 2                                                                                              | ID 1 | ID 2 | Similarity | Activity 1 | Activity 2 | Delta Activity | SALI   |
|----------------------------------------------------------------------------------------------------------|----------------------------------------------------------------------------------------------------------|------|------|------------|------------|------------|----------------|--------|
| 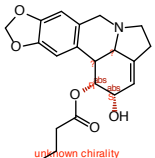<br>unknown chirality   | <br>unknown chirality   | N339 | N402 | 0.89334    | 1.0352538  | 1.5672873  | 0.53203        | 4.9881 |
| <br>unknown chirality   | <br>unknown chirality   | N342 | N429 | 0.85007    | 1.0676314  | 1.8084987  | 0.74087        | 4.9413 |
| <br>unknown chirality   | <br>unknown chirality   | N133 | N250 | 0.92566    | 0.0541884  | 0.4201844  | 0.366          | 4.9232 |
| <br>unknown chirality   | <br>unknown chirality   | N152 | N185 | 0.97931    | 0.1        | 0.2        | 0.1            | 4.8339 |
| <br>unknown chirality   | <br>unknown chirality   | N675 | N719 | 0.83612    | 5.2238231  | 6          | 0.77618        | 4.7364 |
| <br>unknown chirality  | <br>unknown chirality  | N662 | N605 | 0.87093    | 5          | 4.4000001  | 0.6            | 4.6487 |
| <br>unknown chirality | <br>unknown chirality | N254 | N356 | 0.82465    | 0.4743721  | 1.2760671  | 0.80169        | 4.572  |
| <br>unknown chirality | <br>unknown chirality | N461 | N491 | 0.85318    | 2.23       | 2.9000001  | 0.67           | 4.5633 |
| <br>unknown chirality | <br>unknown chirality | N314 | N191 | 0.85067    | 0.8920000  | 0.2135617  | 0.67844        | 4.5431 |
| <br>unknown chirality | <br>unknown chirality | N575 | N639 | 0.80187    | 3.9000001  | 4.8000002  | 0.9            | 4.5425 |
| <br>unknown chirality | <br>unknown chirality | N195 | N311 | 0.87288    | 0.2323372  | 0.8000000  | 0.56766        | 4.4654 |

| Structure 1                                                                         | Structure 2                                                                         | ID 1 | ID 2 | Similarity | Activity 1 | Activity 2 | Delta Activity | SALI   |
|-------------------------------------------------------------------------------------|-------------------------------------------------------------------------------------|------|------|------------|------------|------------|----------------|--------|
| 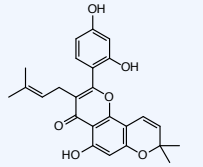   |    | N617 | N562 | 0.81211    | 4.5        | 3.7        | 0.8            | 4.2579 |
|    |    | N412 | N347 | 0.8752     | 1.63       | 1.1        | 0.53           | 4.2468 |
|    |    | N302 | N338 | 0.94338    | 0.7945433  | 1.034349   | 0.23981        | 4.2354 |
|    |    | N189 | N283 | 0.89885    | 0.2037944  | 0.6311924  | 0.4274         | 4.2252 |
|    |    | N604 | N662 | 0.85608    | 4.4000001  | 5          | 0.6            | 4.1688 |
|  |  | N234 | N176 | 0.95595    | 0.3529999  | 0.1718350  | 0.18116        | 4.1123 |
|  |  | N405 | N339 | 0.86137    | 1.6        | 1.0352538  | 0.56475        | 4.0739 |
|  |  | N19  | N434 | 0.82073    | 1.21       | 1.9340975  | 0.7241         | 4.0392 |
|  |  | N731 | N672 | 0.80121    | 6          | 5.1999998  | 0.8            | 4.0243 |
|  |  | N171 | N264 | 0.91234    | 0.16       | 0.5092625  | 0.34926        | 3.9841 |
|  |  | N407 | N303 | 0.79859    | 1.6        | 0.8000000  | 0.8            | 3.972  |

| Structure 1                                                                         | Structure 2                                                                         | ID 1 | ID 2 | Similarity | Activity 1 | Activity 2 | Delta Activity | SALI   |
|-------------------------------------------------------------------------------------|-------------------------------------------------------------------------------------|------|------|------------|------------|------------|----------------|--------|
| 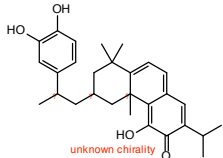   |    | N630 | N677 | 0.84645    | 4.6999998  | 5.3000002  | 0.6            | 3.9075 |
|    |    | N442 | N356 | 0.81318    | 2          | 1.2760671  | 0.72393        | 3.8751 |
|    |    | N407 | N328 | 0.84495    | 1.6        | 1          | 0.6            | 3.8697 |
|    |    | N604 | N665 | 0.82332    | 4.4000001  | 5.0829086  | 0.68291        | 3.8653 |
|    |    | N311 | N212 | 0.86183    | 0.8000000  | 0.2710519  | 0.52895        | 3.8284 |
|  |  | N750 | N700 | 0.8154     | 6.4000001  | 5.6999998  | 0.7            | 3.7919 |
|  |  | N136 | N266 | 0.87695    | 0.0632496  | 0.5286225  | 0.46537        | 3.7819 |
|  |  | N508 | N555 | 0.82667    | 3          | 3.6544397  | 0.65444        | 3.7757 |
|  |  | N264 | N194 | 0.92467    | 0.5092625  | 0.2307537  | 0.27851        | 3.6974 |
|  |  | N722 | N676 | 0.80847    | 6          | 5.3000002  | 0.7            | 3.6547 |
|  |  | N308 | N184 | 0.83579    | 0.8000000  | 0.2        | 0.6            | 3.6538 |

| Structure 1                                                                         | Structure 2                                                                         | ID 1 | ID 2 | Similarity | Activity 1 | Activity 2 | Delta Activity | SALI   |
|-------------------------------------------------------------------------------------|-------------------------------------------------------------------------------------|------|------|------------|------------|------------|----------------|--------|
| 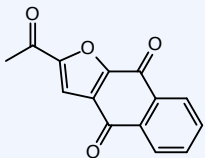   |    | N85  | N168 | 0.95923    | 0.00200000 | 0.15000000 | 0.148          | 3.6297 |
|    |    | N191 | N142 | 0.96445    | 0.2135617  | 0.0854246  | 0.12814        | 3.6048 |
|    |    | N154 | N264 | 0.88652    | 0.1059363  | 0.5092625  | 0.40333        | 3.5541 |
|    |    | N340 | N267 | 0.85954    | 1.04       | 0.5500000  | 0.49           | 3.4885 |
|    |    | N749 | N772 | 0.85405    | 6.4000001  | 6.9000001  | 0.5            | 3.4258 |
|   |   | N133 | N246 | 0.89828    | 0.0541884  | 0.4014561  | 0.34727        | 3.4141 |
|  |  | N234 | N264 | 0.95411    | 0.3529999  | 0.5092625  | 0.15626        | 3.4048 |
|  |  | N285 | N338 | 0.88322    | 0.6399999  | 1.034349   | 0.39435        | 3.3768 |
|  |  | N133 | N247 | 0.89443    | 0.0541884  | 0.4097829  | 0.35559        | 3.3682 |
|  |  | N175 | N269 | 0.88218    | 0.17       | 0.5616411  | 0.39164        | 3.3242 |
|  |  | N394 | N420 | 0.9398     | 1.5        | 1.7        | 0.2            | 3.322  |

| Structure 1                                                                                              | Structure 2                                                                                              | ID 1 | ID 2 | Similarity | Activity 1 | Activity 2 | Delta Activity | SALI   |
|----------------------------------------------------------------------------------------------------------|----------------------------------------------------------------------------------------------------------|------|------|------------|------------|------------|----------------|--------|
| 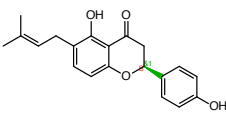<br>racemate            | <br>racemate            | N525 | N573 | 0.80103    | 3.24       | 3.9000001  | 0.66           | 3.317  |
| <br>unknown chirality   | <br>unknown chirality   | N557 | N571 | 0.93965    | 3.7        | 3.9000001  | 0.2            | 3.314  |
| <br>racemate            | <br>unknown chirality   | N269 | N177 | 0.88226    | 0.5616411  | 0.1723969  | 0.38924        | 3.3058 |
| <br>racemate            | <br>unknown chirality   | N213 | N297 | 0.87157    | 0.28       | 0.7038518  | 0.42385        | 3.3003 |
| <br>unknown chirality   | <br>unknown chirality   | N389 | N347 | 0.87828    | 1.5        | 1.1        | 0.4            | 3.2861 |
| <br>unknown chirality  | <br>unknown chirality  | N680 | N715 | 0.81564    | 5.4000001  | 6          | 0.6            | 3.2545 |
| <br>unknown chirality | <br>unknown chirality | N407 | N327 | 0.81211    | 1.6        | 1          | 0.6            | 3.1934 |
| <br>unknown chirality | <br>unknown chirality | N154 | N241 | 0.91648    | 0.1059363  | 0.3709354  | 0.265          | 3.173  |
| <br>unknown chirality | <br>unknown chirality | N524 | N555 | 0.86776    | 3.2350938  | 3.6544397  | 0.41935        | 3.171  |
| <br>unknown chirality | <br>unknown chirality | N289 | N327 | 0.88831    | 0.6499999  | 1          | 0.35           | 3.1337 |
| <br>racemate          | <br>racemate          | N113 | N267 | 0.82917    | 0.02       | 0.5500000  | 0.53           | 3.1025 |



| Structure 1                                                                                              | Structure 2                                                                                              | ID 1 | ID 2 | Similarity | Activity 1 | Activity 2 | Delta Activity | SALI   |
|----------------------------------------------------------------------------------------------------------|----------------------------------------------------------------------------------------------------------|------|------|------------|------------|------------|----------------|--------|
| 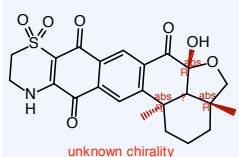<br>unknown chirality   | <br>this enantiomer     | N7   | N343 | 0.80579    | 0.5        | 1.1        | 0.6            | 3.0894 |
| <br>unknown chirality   | <br>unknown chirality   | N176 | N207 | 0.9691     | 0.1718350  | 0.2649538  | 9.3119e-2      | 3.0132 |
| <br>acetate             | <br>unknown chirality   | N483 | N451 | 0.83096    | 2.5999999  | 2.0999999  | 0.5            | 2.958  |
| <br>unknown chirality   | <br>unknown chirality   | N246 | N311 | 0.86427    | 0.4014561  | 0.8000000  | 0.39854        | 2.9363 |
| <br>unknown chirality   | <br>unknown chirality   | N662 | N616 | 0.82915    | 5          | 4.5        | 0.5            | 2.9266 |
| <br>unknown chirality | <br>unknown chirality | N19  | N413 | 0.8479     | 1.21       | 1.6503562  | 0.44036        | 2.8951 |
| <br>unknown chirality | <br>unknown chirality | N289 | N165 | 0.82332    | 0.6499999  | 0.14       | 0.51           | 2.8866 |
| <br>unknown chirality | <br>unknown chirality | N555 | N589 | 0.84495    | 3.6544397  | 4.0999999  | 0.44556        | 2.8737 |
| <br>unknown chirality | <br>unknown chirality | N264 | N177 | 0.88247    | 0.5092625  | 0.1723969  | 0.33687        | 2.8662 |
| <br>acetate           | <br>unknown chirality | N452 | N482 | 0.82471    | 2.0999999  | 2.5999999  | 0.5            | 2.8523 |
| <br>unknown chirality | <br>unknown chirality | N311 | N250 | 0.86674    | 0.8000000  | 0.4201844  | 0.37982        | 2.8501 |

| Structure 1                                                                                              | Structure 2                                                                                              | ID 1 | ID 2 | Similarity | Activity 1 | Activity 2 | Delta Activity | SALI   |
|----------------------------------------------------------------------------------------------------------|----------------------------------------------------------------------------------------------------------|------|------|------------|------------|------------|----------------|--------|
| 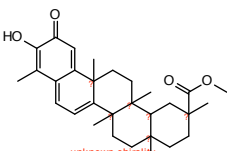<br>unknown chirality   | <br>unknown chirality   | N247 | N311 | 0.86078    | 0.4097829  | 0.8000000  | 0.39022        | 2.8028 |
| <br>unknown chirality   | <br>unknown chirality   | N197 | N303 | 0.79777    | 0.2399999  | 0.8000000  | 0.56           | 2.7692 |
| <br>unknown chirality   | <br>unknown chirality   | N391 | N347 | 0.85328    | 1.5        | 1.1        | 0.4            | 2.7264 |
| <br>unknown chirality   | <br>unknown chirality   | N279 | N317 | 0.88991    | 0.62       | 0.9200000  | 0.3            | 2.7249 |
| <br>unknown chirality   | <br>unknown chirality   | N142 | N194 | 0.94629    | 0.0854246  | 0.2307537  | 0.14533        | 2.7057 |
| <br>unknown chirality | <br>unknown chirality | N314 | N264 | 0.85749    | 0.8920000  | 0.5092625  | 0.38274        | 2.6857 |
| <br>unknown chirality | <br>unknown chirality | N154 | N269 | 0.83005    | 0.1059363  | 0.5616411  | 0.4557         | 2.6814 |
| <br>unknown chirality | <br>unknown chirality | N278 | N317 | 0.88639    | 0.62       | 0.9200000  | 0.3            | 2.6407 |
| <br>unknown chirality | <br>unknown chirality | N389 | N350 | 0.86339    | 1.5        | 1.14       | 0.36           | 2.6353 |
| <br>unknown chirality | <br>unknown chirality | N357 | N389 | 0.91641    | 1.28       | 1.5        | 0.22           | 2.6317 |
| <br>unknown chirality | <br>unknown chirality | N195 | N250 | 0.92835    | 0.2323372  | 0.4201844  | 0.18785        | 2.6218 |

| Structure 1                                                                         | Structure 2                                                                         | ID 1 | ID 2 | Similarity | Activity 1 | Activity 2 | Delta Activity | SALI   |
|-------------------------------------------------------------------------------------|-------------------------------------------------------------------------------------|------|------|------------|------------|------------|----------------|--------|
| 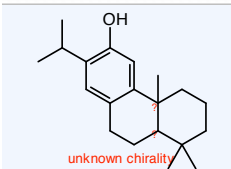   |    | N533 | N541 | 0.93284    | 3.3164415  | 3.4909911  | 0.17455        | 2.5988 |
|    |    | N241 | N194 | 0.946      | 0.3709354  | 0.2307537  | 0.14018        | 2.5957 |
|    |    | N212 | N250 | 0.94232    | 0.2710519  | 0.4201844  | 0.14913        | 2.5856 |
|    |    | N249 | N272 | 0.93637    | 0.4129999  | 0.5747     | 0.1617         | 2.5411 |
|    |    | N282 | N205 | 0.8541     | 0.63       | 0.2599999  | 0.37           | 2.5361 |
|   |   | N179 | N267 | 0.85209    | 0.1800000  | 0.5500000  | 0.37           | 2.5015 |
|  |  | N331 | N305 | 0.91977    | 1          | 0.8000000  | 0.2            | 2.4928 |
|  |  | N331 | N304 | 0.91977    | 1          | 0.8000000  | 0.2            | 2.4928 |
|  |  | N729 | N743 | 0.89158    | 6          | 6.2685881  | 0.26859        | 2.4772 |
|  |  | N537 | N492 | 0.79777    | 3.4000001  | 2.9000001  | 0.5            | 2.4725 |
|  |  | N344 | N372 | 0.87803    | 1.1        | 1.4        | 0.3            | 2.4597 |

| Structure 1                                                                         | Structure 2                                                                         | ID 1 | ID 2 | Similarity | Activity 1 | Activity 2 | Delta Activity | SALI   |
|-------------------------------------------------------------------------------------|-------------------------------------------------------------------------------------|------|------|------------|------------|------------|----------------|--------|
| 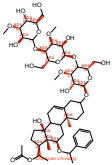   |    | N799 | N802 | 0.95856    | 7.4000001  | 7.5        | 0.1            | 2.4132 |
|    |    | N350 | N391 | 0.85014    | 1.14       | 1.5        | 0.36           | 2.4023 |
|    |    | N410 | N449 | 0.79546    | 1.6068573  | 2.0883331  | 0.48148        | 2.3539 |
|    |    | N234 | N154 | 0.89289    | 0.3529999  | 0.1059363  | 0.24706        | 2.3067 |
|    |    | N722 | N746 | 0.86764    | 6          | 6.3000002  | 0.3            | 2.2666 |
|   |   | N388 | N350 | 0.8371     | 1.5        | 1.14       | 0.36           | 2.21   |
|  |  | N171 | N234 | 0.91021    | 0.16       | 0.3529999  | 0.193          | 2.1495 |
|  |  | N289 | N328 | 0.83549    | 0.6499999  | 1          | 0.35           | 2.1276 |
|  |  | N416 | N435 | 0.85775    | 1.6799999  | 1.98       | 0.3            | 2.1089 |
|  |  | N133 | N212 | 0.89402    | 0.0541884  | 0.2710519  | 0.21686        | 2.0462 |
|  |  | N241 | N177 | 0.90253    | 0.3709354  | 0.1723969  | 0.19854        | 2.0369 |

| Structure 1                                                                                              | Structure 2                                                                                              | ID 1 | ID 2 | Similarity | Activity 1 | Activity 2 | Delta Activity | SALI   |
|----------------------------------------------------------------------------------------------------------|----------------------------------------------------------------------------------------------------------|------|------|------------|------------|------------|----------------|--------|
| 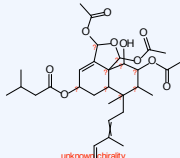<br>unknown chirality   | <br>unknown chirality   | N673 | N686 | 0.85233    | 5.1999998  | 5.5        | 0.3            | 2.0316 |
| <br>unknown chirality   | <br>unknown chirality   | N701 | N682 | 0.83785    | 5.752852   | 5.4273667  | 0.32549        | 2.0073 |
| <br>racemate            | <br>unknown chirality   | N186 | N226 | 0.935      | 0.2        | 0.3300000  | 0.13           | 2      |
| <br>unknown chirality   | <br>unknown chirality   | N249 | N287 | 0.88148    | 0.4129999  | 0.6488999  | 0.2359         | 1.9903 |
| <br>racemate            | <br>racemate            | N470 | N483 | 0.89828    | 2.4000001  | 2.5999999  | 0.2            | 1.9663 |
| <br>unknown chirality  | <br>unknown chirality  | N250 | N119 | 0.79944    | 0.4201844  | 0.0270000  | 0.39318        | 1.9604 |
| <br>unknown chirality | <br>unknown chirality | N784 | N794 | 0.90581    | 7.0673671  | 7.25       | 0.18263        | 1.9391 |
| <br>unknown chirality | <br>unknown chirality | N729 | N746 | 0.84495    | 6          | 6.3000002  | 0.3            | 1.9349 |
| <br>unknown chirality | <br>unknown chirality | N106 | N190 | 0.8991     | 0.015      | 0.2099999  | 0.195          | 1.9326 |
| <br>racemate          | <br>unknown chirality | N219 | N255 | 0.9062     | 0.3000000  | 0.4799999  | 0.18           | 1.9189 |
| <br>unknown chirality | <br>unknown chirality | N469 | N482 | 0.89541    | 2.4000001  | 2.5999999  | 0.2            | 1.9123 |

| Structure 1                                                                         | Structure 2                                                                         | ID 1 | ID 2 | Similarity | Activity 1 | Activity 2 | Delta Activity | SALI   |
|-------------------------------------------------------------------------------------|-------------------------------------------------------------------------------------|------|------|------------|------------|------------|----------------|--------|
| 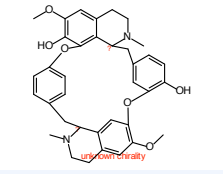   |    | N234 | N191 | 0.92683    | 0.3529999  | 0.2135617  | 0.13944        | 1.9056 |
|    |    | N681 | N665 | 0.83145    | 5.4000001  | 5.0829086  | 0.31709        | 1.8813 |
|    |    | N154 | N207 | 0.91441    | 0.1059363  | 0.2649538  | 0.15902        | 1.858  |
|    |    | N604 | N638 | 0.80121    | 4.4000001  | 4.7674356  | 0.36744        | 1.8483 |
|    |    | N136 | N230 | 0.8483     | 0.0632496  | 0.3435565  | 0.28031        | 1.8478 |
|   |   | N151 | N231 | 0.86593    | 0.0979999  | 0.3440000  | 0.246          | 1.8349 |
|  |  | N272 | N287 | 0.95913    | 0.5747     | 0.6488999  | 0.0742         | 1.8153 |
|  |  | N187 | N223 | 0.93373    | 0.2        | 0.3199999  | 0.12           | 1.8109 |
|  |  | N746 | N718 | 0.83219    | 6.3000002  | 6          | 0.3            | 1.7877 |
|  |  | N175 | N241 | 0.88699    | 0.17       | 0.3709354  | 0.20094        | 1.778  |
|  |  | N195 | N133 | 0.89932    | 0.2323372  | 0.0541884  | 0.17815        | 1.7694 |

| Structure 1                                                                                              | Structure 2                                                                                              | ID 1 | ID 2 | Similarity | Activity 1 | Activity 2 | Delta Activity | SALI   |
|----------------------------------------------------------------------------------------------------------|----------------------------------------------------------------------------------------------------------|------|------|------------|------------|------------|----------------|--------|
| 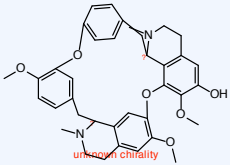<br>unknown chirality   | <br>unknown chirality   | N191 | N207 | 0.97074    | 0.2135617  | 0.2649538  | 5.1392e-2      | 1.7566 |
| <br>unknown chirality   | <br>this enantiomer     | N250 | N148 | 0.81429    | 0.4201844  | 0.0939999  | 0.32618        | 1.7564 |
| <br>racemate            | <br>unknown chirality   | N722 | N743 | 0.84464    | 6          | 6.2685881  | 0.26859        | 1.7288 |
| <br>racemate            | <br>unknown chirality   | N452 | N469 | 0.82229    | 2.0999999  | 2.4000001  | 0.3            | 1.6882 |
| <br>racemate            | <br>unknown chirality   | N743 | N732 | 0.8386     | 6.2685881  | 6          | 0.26859        | 1.6641 |
| <br>racemate          | <br>unknown chirality | N470 | N451 | 0.81924    | 2.4000001  | 2.0999999  | 0.3            | 1.6597 |
| <br>racemate          | <br>racemate          | N340 | N364 | 0.83705    | 1.04       | 1.3099999  | 0.27           | 1.6569 |
| <br>unknown chirality | <br>unknown chirality | N171 | N241 | 0.87139    | 0.16       | 0.3709354  | 0.21094        | 1.6401 |
| <br>unknown chirality | <br>unknown chirality | N352 | N333 | 0.87793    | 1.2        | 1          | 0.2            | 1.6384 |
| <br>unknown chirality | <br>unknown chirality | N19  | N382 | 0.82592    | 1.21       | 1.4920259  | 0.28203        | 1.6201 |
| <br>unknown chirality | <br>unknown chirality | N195 | N247 | 0.88793    | 0.2323372  | 0.4097829  | 0.17745        | 1.5833 |

| Structure 1                                                                         | Structure 2                                                                         | ID 1 | ID 2 | Similarity | Activity 1 | Activity 2 | Delta Activity | SALI   |
|-------------------------------------------------------------------------------------|-------------------------------------------------------------------------------------|------|------|------------|------------|------------|----------------|--------|
| 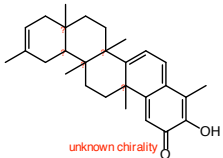   |    | N195 | N246 | 0.89179    | 0.2323372  | 0.4014561  | 0.16912        | 1.5629 |
|    |    | N154 | N176 | 0.95777    | 0.1059363  | 0.1718350  | 6.5899e-2      | 1.5604 |
|    |    | N388 | N357 | 0.85872    | 1.5        | 1.28       | 0.22           | 1.5571 |
|    |    | N743 | N718 | 0.8264     | 6.2685881  | 6          | 0.26859        | 1.5472 |
|    |    | N220 | N255 | 0.88153    | 0.3000000  | 0.4799999  | 0.18           | 1.5194 |
|   |   | N221 | N102 | 0.79975    | 0.3013368  | 0.0126150  | 0.28872        | 1.4418 |
|  |  | N504 | N524 | 0.83674    | 3          | 3.2350938  | 0.23509        | 1.44   |
|  |  | N314 | N347 | 0.85448    | 0.8920000  | 1.1        | 0.208          | 1.4294 |
|  |  | N137 | N190 | 0.90171    | 0.0710000  | 0.2099999  | 0.139          | 1.4142 |
|  |  | N190 | N94  | 0.85572    | 0.2099999  | 0.0079702  | 0.20203        | 1.4003 |
|  |  | N92  | N153 | 0.93188    | 0.0062691  | 0.1001015  | 9.3832e-2      | 1.3775 |



| Structure 1                                                                         | Structure 2                                                                         | ID 1 | ID 2 | Similarity | Activity 1 | Activity 2 | Delta Activity | SALI   |
|-------------------------------------------------------------------------------------|-------------------------------------------------------------------------------------|------|------|------------|------------|------------|----------------|--------|
| 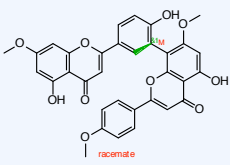   |    | N203 | N255 | 0.83594    | 0.25999999 | 0.47999999 | 0.22           | 1.341  |
|    |    | N234 | N194 | 0.90811    | 0.35299999 | 0.2307537  | 0.12225        | 1.3304 |
|    |    | N178 | N199 | 0.9546     | 0.1800000  | 0.23999999 | 0.06           | 1.3214 |
|    |    | N413 | N382 | 0.87968    | 1.6503562  | 1.4920259  | 0.15833        | 1.3159 |
|    |    | N176 | N191 | 0.96787    | 0.1718350  | 0.2135617  | 4.1727e-2      | 1.2987 |
|   |   | N178 | N226 | 0.88447    | 0.1800000  | 0.3300000  | 0.15           | 1.2984 |
|  |  | N606 | N629 | 0.8259     | 4.4400001  | 4.6599998  | 0.22           | 1.2636 |
|  |  | N212 | N119 | 0.80484    | 0.2710519  | 0.0270000  | 0.24405        | 1.2506 |
|  |  | N135 | N221 | 0.80429    | 0.0578638  | 0.3013368  | 0.24347        | 1.2441 |
|  |  | N234 | N177 | 0.85448    | 0.35299999 | 0.1723969  | 0.1806         | 1.2411 |
|  |  | N357 | N347 | 0.85098    | 1.28       | 1.1        | 0.18           | 1.2079 |

| Structure 1                                                                         | Structure 2                                                                         | ID 1 | ID 2 | Similarity | Activity 1 | Activity 2 | Delta Activity | SALI   |
|-------------------------------------------------------------------------------------|-------------------------------------------------------------------------------------|------|------|------------|------------|------------|----------------|--------|
| 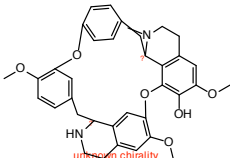   |    | N154 | N191 | 0.91023    | 0.1059363  | 0.2135617  | 0.10763        | 1.1989 |
|    |    | N641 | N663 | 0.80547    | 4.8299999  | 5.0599999  | 0.23           | 1.1823 |
|    |    | N176 | N194 | 0.95005    | 0.1718350  | 0.2307537  | 5.8919e-2      | 1.1795 |
|    |    | N106 | N137 | 0.95123    | 0.015      | 0.0710000  | 0.056          | 1.1483 |
|    |    | N193 | N150 | 0.88773    | 0.2265998  | 0.0979433  | 0.12866        | 1.1459 |
|   |   | N154 | N194 | 0.89089    | 0.1059363  | 0.2307537  | 0.12482        | 1.144  |
|  |  | N106 | N193 | 0.8144     | 0.015      | 0.2265998  | 0.2116         | 1.1401 |
|  |  | N234 | N207 | 0.9206     | 0.3529999  | 0.2649538  | 8.8046e-2      | 1.1089 |
|  |  | N365 | N398 | 0.80316    | 1.3141408  | 1.5319271  | 0.21779        | 1.1064 |
|  |  | N308 | N328 | 0.81754    | 0.8000000  | 1          | 0.2            | 1.0962 |
|  |  | N122 | N193 | 0.82465    | 0.0365483  | 0.2265998  | 0.19005        | 1.0839 |

| Structure 1                                                                         | Structure 2                                                                         | ID 1 | ID 2 | Similarity | Activity 1 | Activity 2 | Delta Activity | SALI    |
|-------------------------------------------------------------------------------------|-------------------------------------------------------------------------------------|------|------|------------|------------|------------|----------------|---------|
| 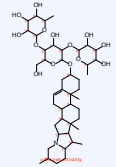   |    | N299 | N272 | 0.87139    | 0.7138000  | 0.5747     | 0.1391         | 1.0816  |
|    |    | N178 | N214 | 0.89733    | 0.1800000  | 0.2899999  | 0.11           | 1.0713  |
|    |    | N193 | N126 | 0.83001    | 0.2265998  | 0.0471255  | 0.17947        | 1.0558  |
|    |    | N247 | N212 | 0.86839    | 0.4097829  | 0.2710519  | 0.13873        | 1.0541  |
|    |    | N640 | N662 | 0.80776    | 4.8000002  | 5          | 0.2            | 1.0404  |
|   |   | N230 | N266 | 0.81661    | 0.3435565  | 0.5286225  | 0.18507        | 1.0091  |
|  |  | N299 | N287 | 0.93502    | 0.7138000  | 0.6488999  | 0.0649         | 0.99869 |
|  |  | N246 | N212 | 0.86904    | 0.4014561  | 0.2710519  | 0.1304         | 0.99578 |
|  |  | N197 | N165 | 0.8956     | 0.2399999  | 0.14       | 0.1            | 0.95789 |
|  |  | N20  | N434 | 0.79619    | 1.74       | 1.9340975  | 0.1941         | 0.95235 |
|  |  | N235 | N266 | 0.81543    | 0.3558477  | 0.5286225  | 0.17277        | 0.93609 |

| Structure 1                                                                                              | Structure 2                                                                                              | ID 1 | ID 2 | Similarity | Activity 1 | Activity 2 | Delta Activity | SALI    |
|----------------------------------------------------------------------------------------------------------|----------------------------------------------------------------------------------------------------------|------|------|------------|------------|------------|----------------|---------|
| 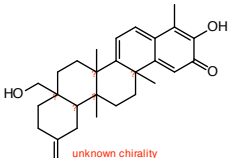<br>unknown chirality   | <br>this enantiomer     | N212 | N148 | 0.80997    | 0.2710519  | 0.0939999  | 0.17705        | 0.93172 |
| <br>unknown chirality   | <br>unknown chirality   | N207 | N177 | 0.90036    | 0.2649538  | 0.1723969  | 9.2557e-2      | 0.92893 |
| <br>unknown chirality   | <br>unknown chirality   | N646 | N640 | 0.88322    | 4.9079509  | 4.8000002  | 0.10795        | 0.92438 |
| <br>unknown chirality   | <br>unknown chirality   | N137 | N193 | 0.82948    | 0.0710000  | 0.2265998  | 0.1556         | 0.91253 |
| <br>unknown chirality   | <br>unknown chirality   | N646 | N638 | 0.83694    | 4.9079509  | 4.7674356  | 0.14052        | 0.86176 |
| <br>unknown chirality  | <br>unknown chirality  | N664 | N643 | 0.80234    | 5.0690041  | 4.9000001  | 0.169          | 0.85504 |
| <br>unknown chirality | <br>unknown chirality | N175 | N207 | 0.88699    | 0.17       | 0.2649538  | 9.4954e-2      | 0.84019 |
| <br>unknown chirality | <br>unknown chirality | N285 | N302 | 0.81601    | 0.6399999  | 0.7945433  | 0.15454        | 0.83997 |
| <br>unknown chirality | <br>unknown chirality | N185 | N141 | 0.85925    | 0.2        | 0.0850000  | 0.115          | 0.81705 |
| <br>unknown chirality | <br>this enantiomer   | N119 | N148 | 0.91799    | 0.0270000  | 0.0939999  | 0.067          | 0.81696 |
| <br>unknown chirality | <br>unknown chirality | N171 | N207 | 0.87139    | 0.16       | 0.2649538  | 0.10495        | 0.81603 |

| Structure 1                                                                                              | Structure 2                                                                                              | ID 1 | ID 2 | Similarity | Activity 1 | Activity 2 | Delta Activity | SALI    |
|----------------------------------------------------------------------------------------------------------|----------------------------------------------------------------------------------------------------------|------|------|------------|------------|------------|----------------|---------|
| 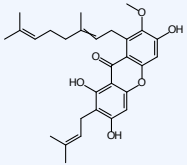                        |                         | N743 | N746 | 0.96116    | 6.2685881  | 6.3000002  | 3.1412e-2      | 0.8088  |
| <br>unknown chirality   | <br>unknown chirality   | N254 | N230 | 0.83484    | 0.4743721  | 0.3435565  | 0.13082        | 0.79204 |
| <br>unknown chirality   | <br>unknown chirality   | N550 | N548 | 0.91556    | 3.5999999  | 3.533287   | 6.6713e-2      | 0.79007 |
| <br>unknown chirality   | <br>unknown chirality   | N142 | N177 | 0.88696    | 0.0854246  | 0.1723969  | 8.6972e-2      | 0.76937 |
| <br>unknown chirality   | <br>unknown chirality   | N605 | N616 | 0.86791    | 4.4000001  | 4.5        | 0.1            | 0.75705 |
|                       |                       | N344 | N353 | 0.86493    | 1.1        | 1.2        | 0.1            | 0.74035 |
| <br>unknown chirality | <br>unknown chirality | N154 | N177 | 0.90455    | 0.1059363  | 0.1723969  | 6.6461e-2      | 0.6963  |
| <br>racemate          | <br>racemate          | N412 | N392 | 0.80024    | 1.63       | 1.5        | 0.13           | 0.65078 |
| <br>unknown chirality | <br>unknown chirality | N196 | N235 | 0.81639    | 0.2372318  | 0.3558477  | 0.11862        | 0.64602 |
| <br>unknown chirality | <br>unknown chirality | N272 | N290 | 0.87638    | 0.5747     | 0.6524999  | 0.0778         | 0.62933 |
| <br>unknown chirality | <br>unknown chirality | N223 | N205 | 0.90377    | 0.3199999  | 0.2599999  | 0.06           | 0.62353 |

| Structure 1                                                                                              | Structure 2                                                                                              | ID 1 | ID 2 | Similarity | Activity 1 | Activity 2 | Delta Activity | SALI    |
|----------------------------------------------------------------------------------------------------------|----------------------------------------------------------------------------------------------------------|------|------|------------|------------|------------|----------------|---------|
| 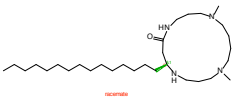<br>racemate            | <br>unknown chirality   | N186 | N214 | 0.85377    | 0.2        | 0.2899999  | 0.09           | 0.61548 |
| <br>racemate            | <br>racemate            | N394 | N409 | 0.83744    | 1.5        | 1.6        | 0.1            | 0.61515 |
| <br>unknown chirality   | <br>unknown chirality   | N171 | N142 | 0.87546    | 0.16       | 0.0854246  | 7.4575e-2      | 0.59883 |
| <br>unknown chirality   | <br>unknown chirality   | N207 | N194 | 0.94221    | 0.2649538  | 0.2307537  | 0.0342         | 0.59178 |
| <br>racemate            | <br>unknown chirality   | N199 | N226 | 0.84618    | 0.2399999  | 0.3300000  | 0.09           | 0.5851  |
| <br>unknown chirality  | <br>unknown chirality  | N91  | N153 | 0.83921    | 0.0062428  | 0.1001015  | 9.3859e-2      | 0.58373 |
| <br>this enantiomer   | <br>unknown chirality | N399 | N411 | 0.842      | 1.54       | 1.63       | 0.09           | 0.56961 |
| <br>unknown chirality | <br>unknown chirality | N238 | N209 | 0.84174    | 0.3600000  | 0.2700000  | 0.09           | 0.56867 |
| <br>unknown chirality | <br>unknown chirality | N214 | N226 | 0.9291     | 0.2899999  | 0.3300000  | 0.04           | 0.56415 |
| <br>unknown chirality | <br>unknown chirality | N94  | N150 | 0.83798    | 0.0079702  | 0.0979433  | 8.9973e-2      | 0.55531 |
| <br>racemate          | <br>unknown chirality | N175 | N142 | 0.84672    | 0.17       | 0.0854246  | 8.4575e-2      | 0.55175 |

| Structure 1                                                                         | Structure 2                                                                         | ID 1 | ID 2 | Similarity | Activity 1 | Activity 2 | Delta Activity | SALI    |
|-------------------------------------------------------------------------------------|-------------------------------------------------------------------------------------|------|------|------------|------------|------------|----------------|---------|
| 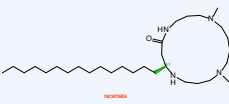   |    | N186 | N199 | 0.92401    | 0.2        | 0.2399999  | 0.04           | 0.52636 |
|    |    | N491 | N505 | 0.80409    | 2.9000001  | 3          | 0.1            | 0.51044 |
|    |    | N171 | N194 | 0.85749    | 0.16       | 0.2307537  | 7.0754e-2      | 0.49648 |
|    |    | N200 | N230 | 0.7988     | 0.2453975  | 0.3435565  | 9.8159e-2      | 0.48787 |
|    |    | N177 | N194 | 0.88021    | 0.1723969  | 0.2307537  | 5.8357e-2      | 0.48718 |
|   |   | N153 | N106 | 0.82157    | 0.1001015  | 0.015      | 8.5102e-2      | 0.47694 |
|  |  | N90  | N153 | 0.79899    | 0.0057634  | 0.1001015  | 9.4338e-2      | 0.46932 |
|  |  | N154 | N142 | 0.95595    | 0.1059363  | 0.0854246  | 2.0512e-2      | 0.4656  |
|  |  | N171 | N191 | 0.88211    | 0.16       | 0.2135617  | 5.3562e-2      | 0.45436 |
|  |  | N175 | N154 | 0.85294    | 0.17       | 0.1059363  | 6.4064e-2      | 0.43564 |
|  |  | N129 | N157 | 0.85242    | 0.0513716  | 0.1148198  | 6.3448e-2      | 0.42992 |

| Structure 1                                                                         | Structure 2                                                                         | ID 1 | ID 2 | Similarity | Activity 1 | Activity 2 | Delta Activity | SALI    |
|-------------------------------------------------------------------------------------|-------------------------------------------------------------------------------------|------|------|------------|------------|------------|----------------|---------|
| 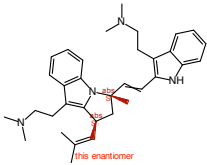   |    | N145 | N112 | 0.82906    | 0.0900000  | 0.02       | 0.07           | 0.40951 |
|    |    | N106 | N150 | 0.79719    | 0.015      | 0.0979433  | 8.2943e-2      | 0.40897 |
|    |    | N348 | N340 | 0.79928    | 1.12       | 1.04       | 0.08           | 0.39857 |
|    |    | N675 | N676 | 0.80862    | 5.2238231  | 5.3000002  | 7.6177e-2      | 0.39804 |
|    |    | N146 | N112 | 0.82373    | 0.0900000  | 0.02       | 0.07           | 0.39712 |
|   |   | N191 | N177 | 0.89142    | 0.2135617  | 0.1723969  | 4.1165e-2      | 0.37911 |
|  |  | N204 | N184 | 0.83885    | 0.2599999  | 0.2        | 0.06           | 0.37232 |
|  |  | N147 | N112 | 0.81079    | 0.0900000  | 0.02       | 0.07           | 0.36996 |
|  |  | N178 | N186 | 0.9455     | 0.1800000  | 0.2        | 0.02           | 0.36694 |
|  |  | N90  | N116 | 0.95072    | 0.0057634  | 0.0228946  | 1.7131e-2      | 0.34763 |
|  |  | N191 | N194 | 0.95005    | 0.2135617  | 0.2307537  | 1.7192e-2      | 0.34418 |



| Structure 1                                                                         | Structure 2                                                                         | ID 1 | ID 2 | Similarity | Activity 1 | Activity 2 | Delta Activity | SALI    |
|-------------------------------------------------------------------------------------|-------------------------------------------------------------------------------------|------|------|------------|------------|------------|----------------|---------|
| 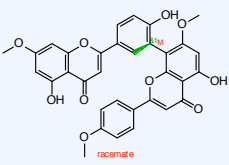   |    | N203 | N219 | 0.88378    | 0.2599999  | 0.3000000  | 0.04           | 0.34417 |
|    |    | N195 | N212 | 0.8872     | 0.2323372  | 0.2710519  | 3.8715e-2      | 0.34322 |
|    |    | N206 | N220 | 0.88337    | 0.2599999  | 0.3000000  | 0.04           | 0.34297 |
|    |    | N92  | N137 | 0.80997    | 0.0062691  | 0.0710000  | 6.4731e-2      | 0.34064 |
|    |    | N92  | N127 | 0.87072    | 0.0062691  | 0.0500000  | 4.3731e-2      | 0.33826 |
|   |   | N122 | N150 | 0.81782    | 0.0365483  | 0.0979433  | 6.1395e-2      | 0.33701 |
|  |  | N82  | N116 | 0.93635    | 0.0014583  | 0.0228946  | 2.1436e-2      | 0.33677 |
|  |  | N322 | N326 | 0.90851    | 0.9703220  | 1          | 2.9678e-2      | 0.32438 |
|  |  | N127 | N153 | 0.84358    | 0.0500000  | 0.1001015  | 5.0102e-2      | 0.3203  |
|  |  | N82  | N115 | 0.93859    | 0.0014583  | 0.0210509  | 1.9593e-2      | 0.31903 |
|  |  | N137 | N94  | 0.79637    | 0.0710000  | 0.0079702  | 0.06303        | 0.30953 |

| Structure 1                                                                         | Structure 2                                                                         | ID 1 | ID 2 | Similarity | Activity 1 | Activity 2 | Delta Activity | SALI    |
|-------------------------------------------------------------------------------------|-------------------------------------------------------------------------------------|------|------|------------|------------|------------|----------------|---------|
| 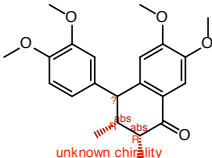   |    | N187 | N205 | 0.80585    | 0.2        | 0.25999999 | 0.06           | 0.30903 |
|    |    | N115 | N127 | 0.90122    | 0.0210509  | 0.0500000  | (2.8949e-2     | 0.29306 |
|    |    | N82  | N127 | 0.82823    | 0.0014583  | 0.0500000  | (4.8542e-2     | 0.2826  |
|    |    | N199 | N214 | 0.82287    | 0.23999999 | 0.28999999 | 0.05           | 0.28228 |
|    |    | N150 | N126 | 0.81997    | 0.0979433  | 0.0471255  | 5.0818e-2      | 0.28227 |
|   |   | N350 | N347 | 0.85787    | 1.14       | 1.1        | 0.04           | 0.28144 |
|  |  | N175 | N191 | 0.84445    | 0.17       | 0.2135617  | 4.3562e-2      | 0.28004 |
|  |  | N135 | N102 | 0.83722    | 0.0578638  | 0.0126150  | 4.5249e-2      | 0.27797 |
|  |  | N230 | N235 | 0.95549    | 0.3435565  | 0.3558477  | 1.2291e-2      | 0.27617 |
|  |  | N220 | N203 | 0.85435    | 0.3000000  | 0.25999999 | 0.04           | 0.27463 |
|  |  | N127 | N87  | 0.82479    | 0.0500000  | 0.0020000  | (0.048         | 0.27396 |

| Structure 1                                                                         | Structure 2                                                                         | ID 1 | ID 2 | Similarity | Activity 1 | Activity 2 | Delta Activity | SALI    |
|-------------------------------------------------------------------------------------|-------------------------------------------------------------------------------------|------|------|------------|------------|------------|----------------|---------|
| 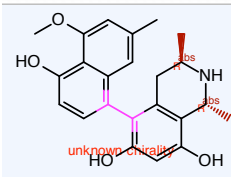   |    | N254 | N266 | 0.80161    | 0.4743721  | 0.5286225  | 0.05425        | 0.27345 |
|    |    | N206 | N219 | 0.85197    | 0.2599999  | 0.3000000  | 0.04           | 0.27022 |
|    |    | N90  | N127 | 0.8264     | 0.0057634  | 0.0500000  | 4.4237e-2      | 0.25482 |
|    |    | N90  | N115 | 0.93912    | 0.0057634  | 0.0210509  | 1.5288e-2      | 0.25113 |
|    |    | N402 | N410 | 0.82465    | 1.5672873  | 1.6068573  | 0.03957        | 0.22566 |
|   |   | N246 | N247 | 0.96185    | 0.4014561  | 0.4097829  | 8.3268e-3      | 0.21825 |
|  |  | N234 | N241 | 0.91648    | 0.3529999  | 0.3709354  | 1.7935e-2      | 0.21476 |
|  |  | N95  | N127 | 0.80477    | 0.0088561  | 0.0500000  | 4.1144e-2      | 0.21075 |
|  |  | N246 | N250 | 0.90919    | 0.4014561  | 0.4201844  | 1.8728e-2      | 0.20623 |
|  |  | N95  | N116 | 0.9281     | 0.0088561  | 0.0228946  | 1.4038e-2      | 0.19526 |
|  |  | N196 | N200 | 0.95804    | 0.2372318  | 0.2453975  | 8.1657e-3      | 0.19459 |

| Structure 1                                                                                              | Structure 2                                                                                              | ID 1 | ID 2 | Similarity | Activity 1 | Activity 2 | Delta Activity | SALI    |
|----------------------------------------------------------------------------------------------------------|----------------------------------------------------------------------------------------------------------|------|------|------------|------------|------------|----------------|---------|
| 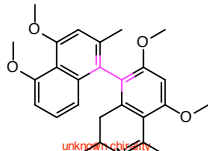<br>unknown chirality   | <br>unknown chirality   | N638 | N640 | 0.82727    | 4.7674356  | 4.8000002  | 3.2565e-2      | 0.18853 |
| <br>unknown chirality   | <br>unknown chirality   | N122 | N137 | 0.81211    | 0.0365483  | 0.0710000  | 3.4452e-2      | 0.18337 |
| <br>unknown chirality   | <br>unknown chirality   | N116 | N127 | 0.82978    | 0.0228946  | 0.0500000  | 2.7105e-2      | 0.15923 |
| <br>unknown chirality   | <br>unknown chirality   | N153 | N137 | 0.80997    | 0.1001015  | 0.0710000  | 2.9102e-2      | 0.15314 |
| <br>unknown chirality   | <br>unknown chirality   | N82  | N95  | 0.95155    | 0.0014583  | 0.0088561  | 7.3979e-3      | 0.1527  |
| <br>unknown chirality  | <br>unknown chirality  | N92  | N122 | 0.79626    | 0.0062691  | 0.0365483  | 3.0279e-2      | 0.14861 |
| <br>unknown chirality | <br>unknown chirality | N95  | N115 | 0.91702    | 0.0088561  | 0.0210509  | 1.2195e-2      | 0.14697 |
| <br>unknown chirality | <br>unknown chirality | N152 | N141 | 0.8975     | 0.1        | 0.0850000  | 0.015          | 0.14634 |
| <br>unknown chirality | <br>unknown chirality | N116 | N87  | 0.85327    | 0.0228946  | 0.0020000  | 2.0895e-2      | 0.1424  |
| <br>unknown chirality | <br>unknown chirality | N137 | N150 | 0.80862    | 0.0710000  | 0.0979433  | 2.6943e-2      | 0.14078 |
| <br>this enantiomer   | <br>this enantiomer   | N140 | N146 | 0.92307    | 0.0799999  | 0.0900000  | 0.01           | 0.12999 |

| Structure 1                                                                         | Structure 2                                                                         | ID 1 | ID 2 | Similarity | Activity 1 | Activity 2 | Delta Activity | SALI      |
|-------------------------------------------------------------------------------------|-------------------------------------------------------------------------------------|------|------|------------|------------|------------|----------------|-----------|
| 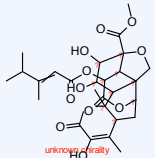   |    | N82  | N90  | 0.96575    | 0.0014583  | 0.0057634  | 4.3051e-3      | 0.12569   |
|    |    | N405 | N410 | 0.94302    | 1.6        | 1.6068573  | 6.8573e-3      | 0.12035   |
|    |    | N322 | N320 | 0.90851    | 0.9703220  | 0.9599999  | 1.0322e-2      | 0.11282   |
|    |    | N122 | N106 | 0.80409    | 0.0365483  | 0.015      | 2.1548e-2      | 0.10999   |
|    |    | N115 | N87  | 0.81665    | 0.0210509  | 0.0020000  | 1.9051e-2      | 0.10391   |
|  |  | N247 | N250 | 0.89662    | 0.4097829  | 0.4201844  | 1.0401e-2      | 0.10061   |
|  |  | N171 | N176 | 0.87546    | 0.16       | 0.1718350  | 1.1835e-2      | 9.5034e-2 |
|  |  | N201 | N196 | 0.89932    | 0.2466175  | 0.2372318  | 9.3857e-3      | 0.09322   |
|  |  | N190 | N193 | 0.79546    | 0.2099999  | 0.2265998  | 0.0166         | 8.1157e-2 |
|  |  | N140 | N145 | 0.8757     | 0.0799999  | 0.0900000  | 0.01           | 8.0454e-2 |
|  |  | N90  | N95  | 0.95843    | 0.0057634  | 0.0088561  | 3.0928e-3      | 7.4404e-2 |

| Structure 1                                                                         | Structure 2                                                                         | ID 1 | ID 2 | Similarity | Activity 1          | Activity 2 | Delta Activity | SALI      |
|-------------------------------------------------------------------------------------|-------------------------------------------------------------------------------------|------|------|------------|---------------------|------------|----------------|-----------|
| 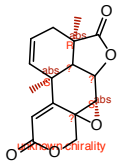   |    | N832 | N827 | 0.84268    | 8.0100002           | 8          | 0.01           | 6.3568e-2 |
|    |    | N829 | N827 | 0.81362    | 8.0100002           | 8          | 0.01           | 5.3656e-2 |
|    |    | N92  | N106 | 0.83096    | 0.0062691;0.015     |            | 8.7308e-3      | 5.1651e-2 |
|    |    | N115 | N116 | 0.95517    | 0.0210509;0.0228946 |            | 1.8437e-3      | 4.1126e-2 |
|    |    | N97  | N101 | 0.953      | 0.0106239;0.0125    |            | 1.876e-3       | 3.9918e-2 |
|   |   | N787 | N789 | 0.86606    | 7.1953335           | 7.1999998  | 4.6663e-3      | 3.4839e-2 |
|  |  | N287 | N290 | 0.83073    | 0.6488999;0.6524999 |            | 0.0036         | 2.1268e-2 |
|  |  | N90  | N87  | 0.80026    | 0.0057634;0.0020000 |            | 3.7634e-3      | 1.8842e-2 |
|  |  | N175 | N177 | 0.834      | 0.17                | 0.1723969  | 2.397e-3       | 1.4439e-2 |
|  |  | N175 | N176 | 0.84672    | 0.17                | 0.1718350  | 1.835e-3       | 1.1972e-2 |
|  |  | N201 | N200 | 0.8417     | 0.2466175;0.2453975 |            | 0.00122        | 7.7068e-3 |

| Structure 1                                                                                              | Structure 2                                                                                              | ID 1 | ID 2 | Similarity | Activity 1 | Activity 2 | Delta Activity | SALI      |
|----------------------------------------------------------------------------------------------------------|----------------------------------------------------------------------------------------------------------|------|------|------------|------------|------------|----------------|-----------|
| 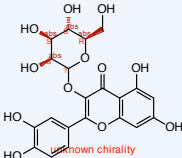<br>unknown chirality   | <br>unknown chirality   | N88  | N89  | 0.91407    | 0.0023000  | 0.0029     | 0.0006         | 6.9824e-3 |
| <br>unknown chirality   | <br>unknown chirality   | N86  | N89  | 0.83235    | 0.0020000  | 0.0029     | 0.0009         | 5.3684e-3 |
| <br>unknown chirality   | <br>unknown chirality   | N176 | N177 | 0.88919    | 0.1718350  | 0.1723969  | 5.6194e-4      | 5.0712e-3 |
| <br>unknown chirality   | <br>unknown chirality   | N96  | N98  | 0.95739    | 0.0106     | 0.0108     | 0.0002         | 4.6942e-3 |
| <br>unknown chirality   | <br>unknown chirality   | N86  | N88  | 0.91282    | 0.0020000  | 0.0023000  | 0.0003         | 3.4412e-3 |
| <br>unknown chirality  | <br>unknown chirality  | N83  | N84  | 0.96926    | 0.0018247  | 0.0019165  | 9.1883e-5      | 2.9889e-3 |
| <br>unknown chirality | <br>unknown chirality | N82  | N87  | 0.79733    | 0.0014583  | 0.0020000  | 5.4169e-4      | 2.6727e-3 |
| <br>unknown chirality | <br>unknown chirality | N91  | N92  | 0.93188    | 0.0062428  | 0.0062691  | 2.6299e-5      | 3.8607e-4 |
| <br>unknown chirality | <br>unknown chirality | N78  | N80  | 0.8091     | 0.0000007  | 0.0000034  | 2.7e-6         | 1.4143e-5 |
| <br>unknown chirality | <br>unknown chirality | N833 | N834 | 0.84007    | 8.0100002  | 8.0100002  | 0              | 0         |
| <br>unknown chirality | <br>unknown chirality | N833 | N831 | 0.82822    | 8.0100002  | 8.0100002  | 0              | 0         |

| Structure 1                                                                                              | Structure 2                                                                                              | ID 1 | ID 2 | Similarity | Activity 1 | Activity 2 | Delta Activity | SALI |
|----------------------------------------------------------------------------------------------------------|----------------------------------------------------------------------------------------------------------|------|------|------------|------------|------------|----------------|------|
| 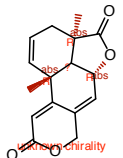<br>unknown chirality   | <br>unknown chirality   | N833 | N828 | 0.8234     | 8.0100002  | 8.0100002  | 0              | 0    |
| <br>unknown chirality   | <br>unknown chirality   | N831 | N834 | 0.86146    | 8.0100002  | 8.0100002  | 0              | 0    |
| <br>unknown chirality   | <br>unknown chirality   | N830 | N831 | 0.80261    | 8.0100002  | 8.0100002  | 0              | 0    |
| <br>unknown chirality   | <br>unknown chirality   | N830 | N828 | 0.79785    | 8.0100002  | 8.0100002  | 0              | 0    |
| <br>unknown chirality   | <br>unknown chirality   | N830 | N833 | 0.86146    | 8.0100002  | 8.0100002  | 0              | 0    |
| <br>unknown chirality  | <br>unknown chirality  | N829 | N832 | 0.87401    | 8.0100002  | 8.0100002  | 0              | 0    |
| <br>unknown chirality | <br>unknown chirality | N828 | N834 | 0.88459    | 8.0100002  | 8.0100002  | 0              | 0    |
| <br>unknown chirality | <br>unknown chirality | N828 | N831 | 0.85419    | 8.0100002  | 8.0100002  | 0              | 0    |
| <br>unknown chirality | <br>unknown chirality | N789 | N925 | 1          | 7.1999998  | 10.596756  | 3.3968         | 0    |
| <br>racemate          | <br>the racemate      | N733 | N734 | 0.81885    | 6          | 6          | 0              | 0    |
| <br>racemate          | <br>the racemate      | N731 | N732 | 0.90474    | 6          | 6          | 0              | 0    |



| Structure 1                                                                         | Structure 2                                                                         | ID 1 | ID 2 | Similarity | Activity 1 | Activity 2 | Delta Activity | SALI |
|-------------------------------------------------------------------------------------|-------------------------------------------------------------------------------------|------|------|------------|------------|------------|----------------|------|
| 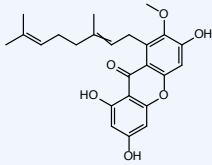   |    | N729 | N732 | 0.82533    | 6          | 6          | 0              | 0    |
|    |    | N729 | N731 | 0.82204    | 6          | 6          | 0              | 0    |
|    |    | N722 | N718 | 0.89051    | 6          | 6          | 0              | 0    |
|    |    | N722 | N719 | 0.8898     | 6          | 6          | 0              | 0    |
|    |    | N722 | N720 | 0.84181    | 6          | 6          | 0              | 0    |
|  |  | N720 | N732 | 0.84161    | 6          | 6          | 0              | 0    |
|  |  | N720 | N731 | 0.82648    | 6          | 6          | 0              | 0    |
|  |  | N720 | N729 | 0.88872    | 6          | 6          | 0              | 0    |
|  |  | N719 | N718 | 0.84636    | 6          | 6          | 0              | 0    |
|  |  | N719 | N731 | 0.85102    | 6          | 6          | 0              | 0    |
|  |  | N679 | N18  | 0.79785    | 5.4000001  | 5.4000001  | 0              | 0    |

| Structure 1                                                                         | Structure 2                                                                         | ID 1 | ID 2 | Similarity | Activity 1 | Activity 2 | Delta Activity | SALI |
|-------------------------------------------------------------------------------------|-------------------------------------------------------------------------------------|------|------|------------|------------|------------|----------------|------|
| 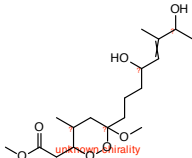   |    | N659 | N660 | 0.83037    | 5          | 5          | 0              | 0    |
|    |    | N656 | N652 | 0.88638    | 5          | 5          | 0              | 0    |
|    |    | N656 | N651 | 0.93839    | 5          | 5          | 0              | 0    |
|    |    | N655 | N652 | 0.91923    | 5          | 5          | 0              | 0    |
|    |    | N655 | N651 | 0.94534    | 5          | 5          | 0              | 0    |
|   |   | N655 | N656 | 0.93923    | 5          | 5          | 0              | 0    |
|  |  | N654 | N652 | 0.89797    | 5          | 5          | 0              | 0    |
|  |  | N654 | N651 | 0.92747    | 5          | 5          | 0              | 0    |
|  |  | N654 | N656 | 0.91937    | 5          | 5          | 0              | 0    |
|  |  | N654 | N655 | 0.94033    | 5          | 5          | 0              | 0    |
|  |  | N651 | N652 | 0.90528    | 5          | 5          | 0              | 0    |

| Structure 1                                                                                              | Structure 2                                                                                              | ID 1 | ID 2 | Similarity | Activity 1 | Activity 2 | Delta Activity | SALI |
|----------------------------------------------------------------------------------------------------------|----------------------------------------------------------------------------------------------------------|------|------|------------|------------|------------|----------------|------|
| 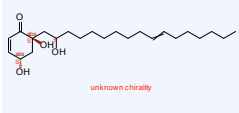<br>unknown chirality   | <br>unknown chirality   | N634 | N635 | 0.85572    | 4.6999998  | 4.6999998  | 0              | 0    |
| <br>unknown chirality   | <br>unknown chirality   | N618 | N619 | 0.99845    | 4.5        | 4.5        | 0              | 0    |
| <br>unknown chirality   | <br>unknown chirality   | N610 | N611 | 0.99814    | 4.5        | 4.5        | 0              | 0    |
| <br>unknown chirality   | <br>unknown chirality   | N604 | N605 | 0.83865    | 4.4000001  | 4.4000001  | 0              | 0    |
| <br>racemate            | <br>racemate            | N562 | N847 | 1          | 3.7        | 8.5167503  | 4.8168         | 0    |
| <br>racemate           | <br>racemate           | N508 | N509 | 0.80064    | 3          | 3          | 0              | 0    |
| <br>racemate          | <br>racemate          | N508 | N504 | 0.94823    | 3          | 3          | 0              | 0    |
| <br>unknown chirality | <br>unknown chirality | N506 | N500 | 0.89253    | 3          | 3          | 0              | 0    |
| <br>unknown chirality | <br>unknown chirality | N505 | N507 | 0.9397     | 3          | 3          | 0              | 0    |
| <br>racemate          | <br>racemate          | N504 | N509 | 0.85165    | 3          | 3          | 0              | 0    |
| <br>unknown chirality | <br>unknown chirality | N500 | N507 | 0.81211    | 3          | 3          | 0              | 0    |

| Structure 1                                                                         | Structure 2                                                                         | ID 1 | ID 2 | Similarity | Activity 1 | Activity 2 | Delta Activity | SALI |
|-------------------------------------------------------------------------------------|-------------------------------------------------------------------------------------|------|------|------------|------------|------------|----------------|------|
| 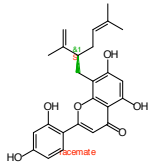   |    | N483 | N482 | 0.85745    | 2.5999999  | 2.5999999  | 0              | 0    |
|    |    | N470 | N469 | 0.86832    | 2.4000001  | 2.4000001  | 0              | 0    |
|    |    | N452 | N451 | 0.86307    | 2.0999999  | 2.0999999  | 0              | 0    |
|    |    | N392 | N393 | 0.97312    | 1.5        | 1.5        | 0              | 0    |
|    |    | N388 | N389 | 0.90257    | 1.5        | 1.5        | 0              | 0    |
|  |  | N385 | N386 | 0.8703     | 1.5        | 1.5        | 0              | 0    |
|  |  | N327 | N328 | 0.91048    | 1          | 1          | 0              | 0    |
|  |  | N320 | N326 | 1          | 0.9599999  | 1          | 0.04           | 0    |
|  |  | N279 | N278 | 0.93686    | 0.62       | 0.62       | 0              | 0    |
|  |  | N259 | N261 | 0.79663    | 0.5        | 0.5        | 0              | 0    |
|  |  | N220 | N219 | 0.98566    | 0.3000000  | 0.3000000  | 0              | 0    |

| Structure 1                                                                       | Structure 2                                                                       | ID 1 | ID 2 | Similarity | Activity 1 | Activity 2 | Delta Activity SALI |
|-----------------------------------------------------------------------------------|-----------------------------------------------------------------------------------|------|------|------------|------------|------------|---------------------|
| 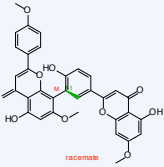 |  | N206 | N203 | 0.9864     | 0.2599999  | 0.2599999  | 0                   |
|  |  | N145 | N146 | 0.95656    | 0.0900000  | 0.0900000  | 0                   |
|  |  | N131 | N132 | 0.98264    | 0.0529999  | 0.0529999  | 0                   |
|  |  | N13  | N169 | 1          | 0.1567119  | 0.1570000  | 2.881e-4            |
|  |  | N305 | N304 | 1          | 0.8000000  | 0.8000000  | NaN                 |
