# Supplementary material for: Prioritization of anti-malarial hits from nature: chemo-informatic profiling of natural products with in vitro antiplasmodial activities and currently registered anti-malarial drugs
Source: Springer Nature journal article supplement (doi:10.1186/s12936-016-1087-y), 2016-01-28
Supplement: MOESM6 [file 9762042]

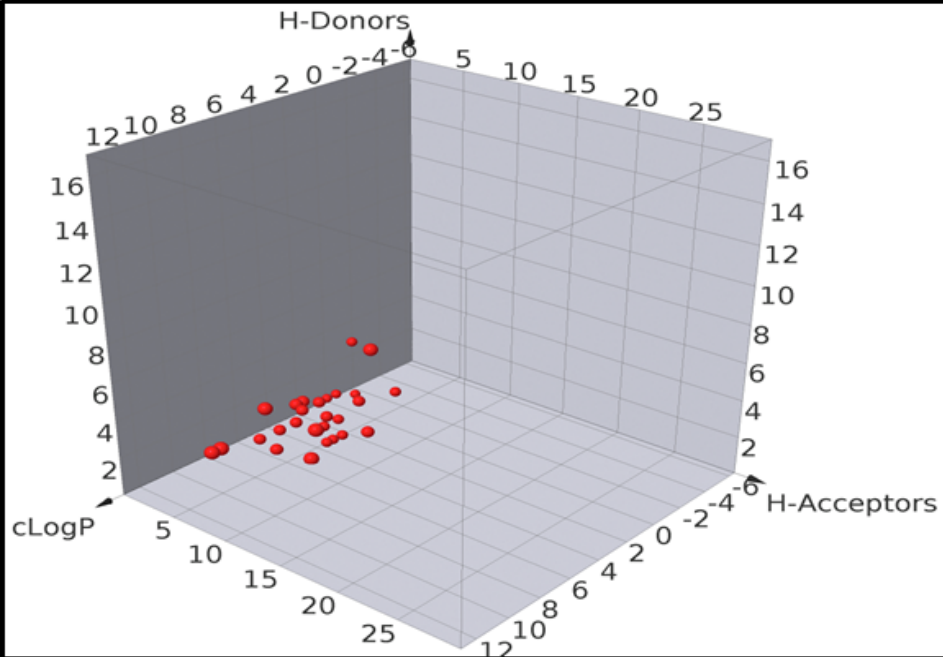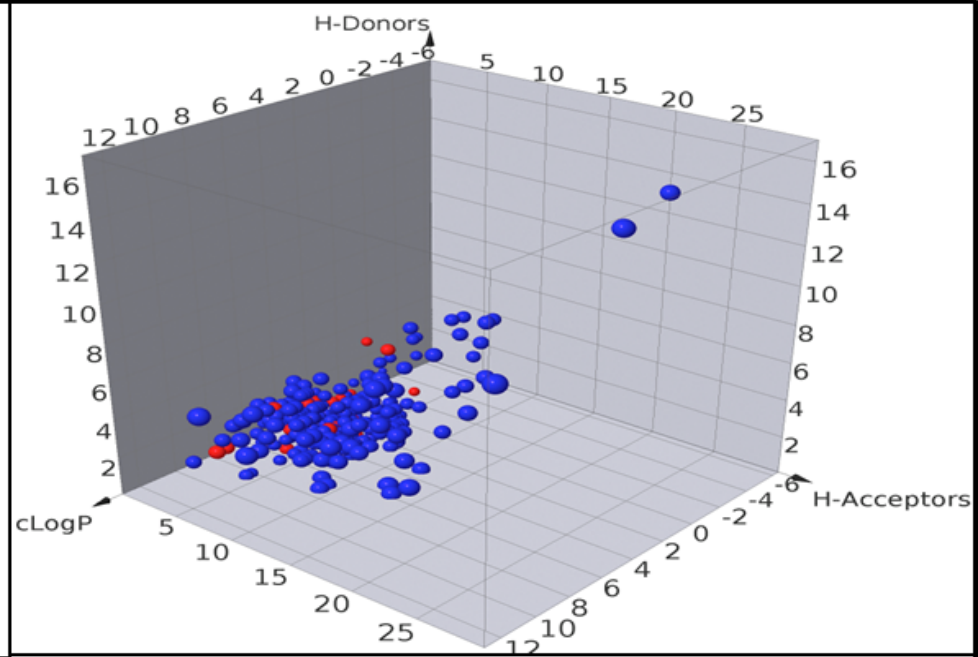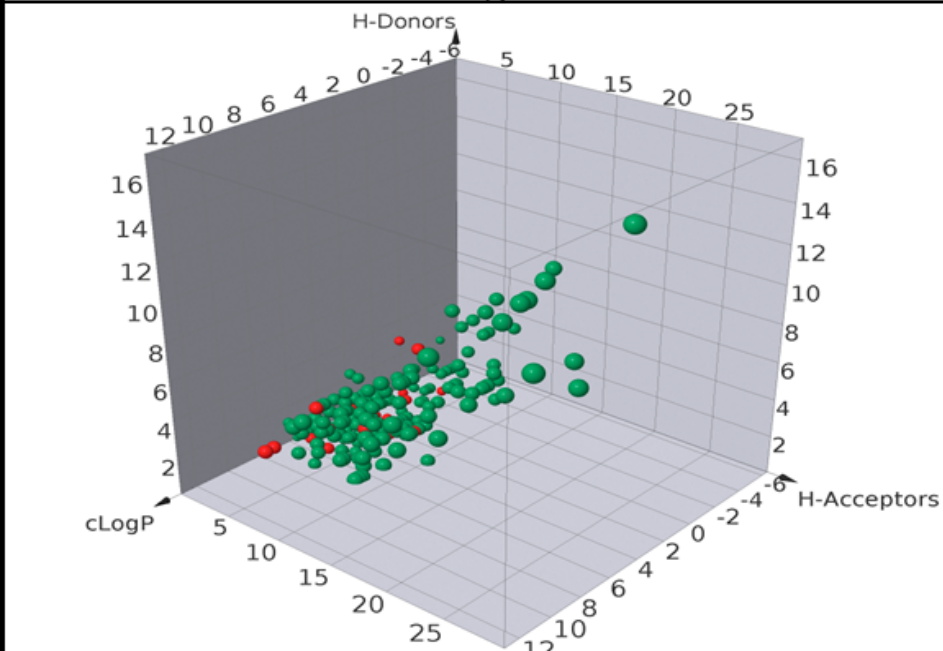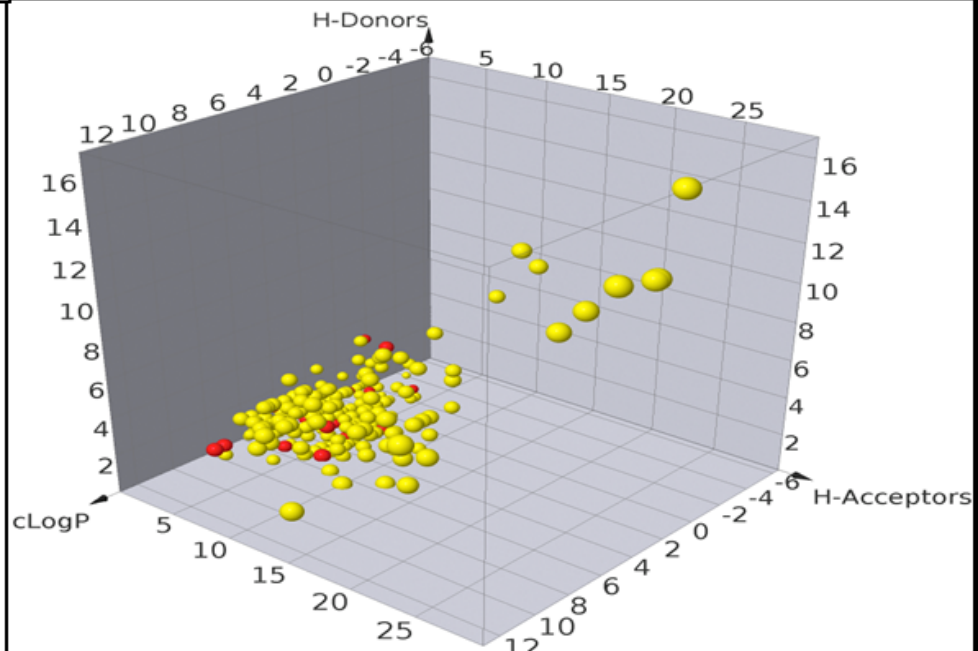

Total Molweight ● 200 ● 400 ● 600 ● 800 ● 1000 ● 1200
