# Supplementary material for: Prioritization of anti-malarial hits from nature: chemo-informatic profiling of natural products with in vitro antiplasmodial activities and currently registered anti-malarial drugs
Source: Springer Nature journal article supplement (doi:10.1186/s12936-016-1087-y), 2016-01-28
Supplement: MOESM8 [file 9762042]

| Structure of Smiles | ID   | Activity_Status | Consensus_score |
|---------------------|------|-----------------|-----------------|
|                     | N437 | A               | 0.75            |
|                     | N377 | A               | 0.25            |
|                     | N379 | A               | -0.25           |
|                     | N536 | A               | 0.5             |
|                     | N528 | A               | 1               |

| Structure of Smiles | ID | Activity_Status | Consensus_score |
|---------------------|----|-----------------|-----------------|
|---------------------|----|-----------------|-----------------|

N430

A

1

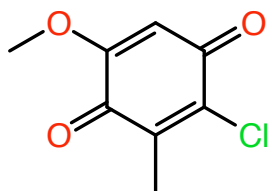

N329

A

0.5

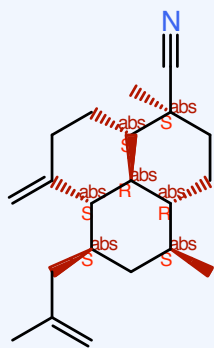

N330

A

0.5

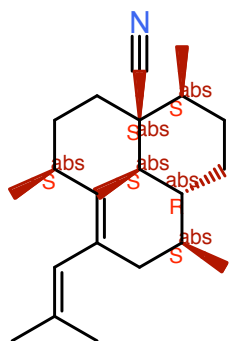

N341

A

0.75

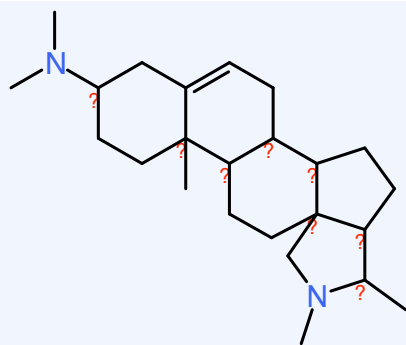

N472

A

0.5

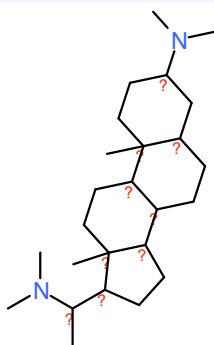

| Structure of Smiles                                                                 | ID   | Activity_Status | Consensus_score |
|-------------------------------------------------------------------------------------|------|-----------------|-----------------|
| 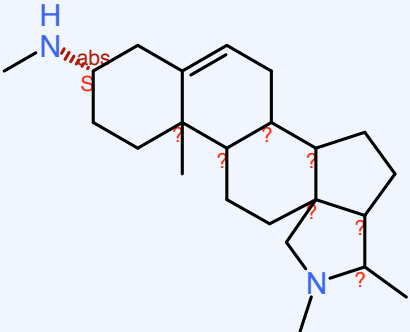   | N534 | A               | 0.75            |
|    | N608 | A               | 0               |
|   | N484 | A               | 1               |
|  | N416 | A               | 0.25            |
|  | N418 | A               | -0.5            |

| Structure of Smiles                                                                 | ID   | Activity_Status | Consensus_score |
|-------------------------------------------------------------------------------------|------|-----------------|-----------------|
| 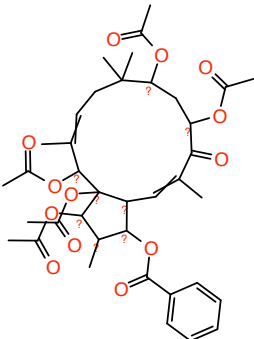   | N643 | A               | -0.5            |
|    | N626 | A               | 0.75            |
|   | N538 | A               | 0.5             |
|  | N478 | A               | 0.75            |
|  | N381 | A               | 0.75            |

| Structure of Smiles                                                                 | ID   | Activity_Status | Consensus_score |
|-------------------------------------------------------------------------------------|------|-----------------|-----------------|
| 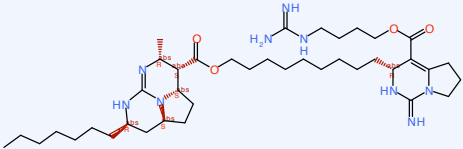   | N618 | A               | -1              |
|    | N619 | A               | -1              |
|   | N440 | A               | 0               |
|  | N490 | A               | 0.75            |
|  | N564 | A               | 1               |

| Structure of Smiles | ID | Activity_Status | Consensus_score |
|---------------------|----|-----------------|-----------------|
|---------------------|----|-----------------|-----------------|

N395

A

0

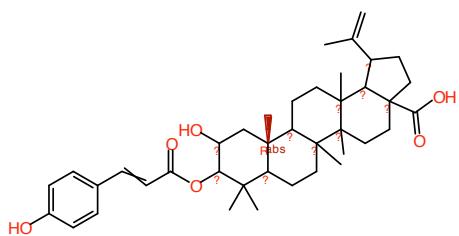

N610

A

-0.25

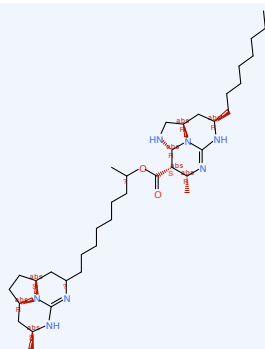

N611

A

-0.25

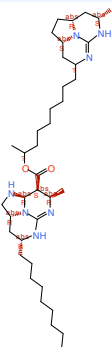

N620

A

0.75

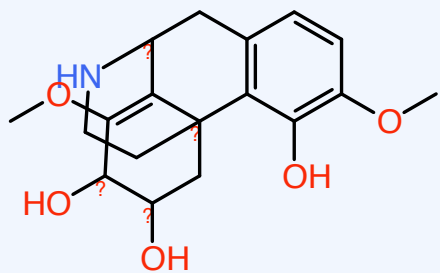

N521

A

0.5

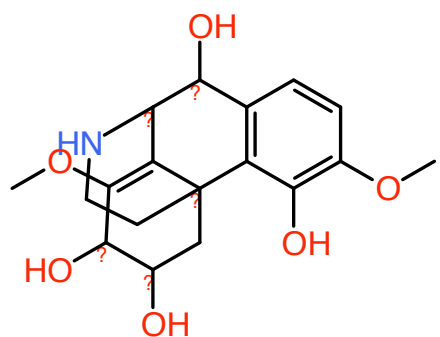

| Structure of Smiles                                                                 | ID   | Activity_Status | Consensus_score |
|-------------------------------------------------------------------------------------|------|-----------------|-----------------|
| 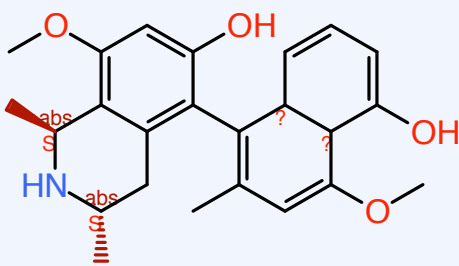   | N475 | A               | 0.75            |
|    | N471 | A               | 1               |
|   | N578 | A               | 0.75            |
|  | N516 | A               | 0.75            |
|  | N368 | A               | 0.5             |

| Structure of Smiles                                                                 | ID   | Activity_Status | Consensus_score |
|-------------------------------------------------------------------------------------|------|-----------------|-----------------|
| 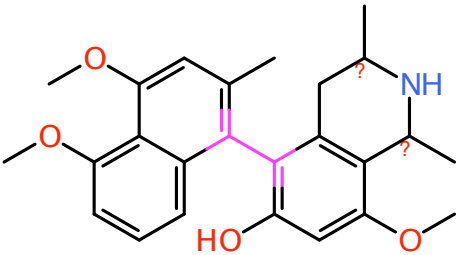   | N646 | A               | 0.5             |
|    | N604 | A               | 0.25            |
|   | N640 | A               | 0.5             |
|  | N442 | A               | 0.25            |
|  | N590 | A               | 0.75            |



| Structure of Smiles                                                                 | ID   | Activity_Status | Consensus_score |
|-------------------------------------------------------------------------------------|------|-----------------|-----------------|
| 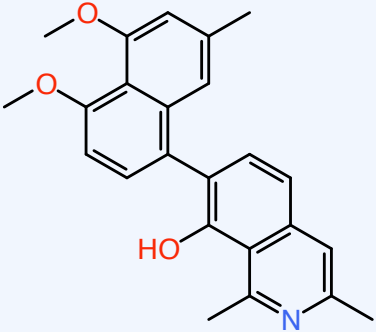   | N361 | A               | 0.25            |
|    | N338 | A               | 1               |
|   | N342 | A               | 1               |
|  | N400 | A               | 0.5             |
|  | N638 | A               | 0.25            |

| Structure of Smiles                                                                 | ID   | Activity_Status | Consensus_score |
|-------------------------------------------------------------------------------------|------|-----------------|-----------------|
| 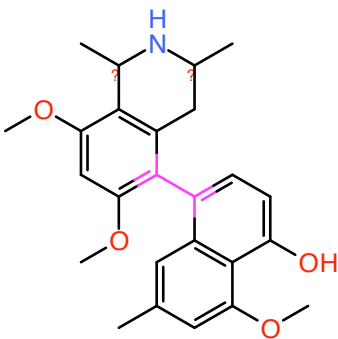   | N356 | A               | 0.5             |
|    | N605 | A               | 0.25            |
|   | N616 | A               | 0.25            |
|  | N446 | A               | 0.5             |
|  | N408 | A               | 1               |

| Structure of Smiles                                                                 | ID   | Activity_Status | Consensus_score |
|-------------------------------------------------------------------------------------|------|-----------------|-----------------|
| 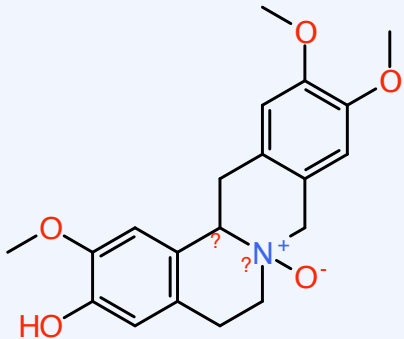   | N595 | A               | 0.75            |
|    | N351 | A               | 1               |
|   | N394 | A               | 0.75            |
|  | N420 | A               | 0.25            |
|  | N647 | A               | 1               |

| Structure of Smiles | ID   | Activity_Status | Consensus_score |
|---------------------|------|-----------------|-----------------|
|                     | N600 | A               | -0.5            |

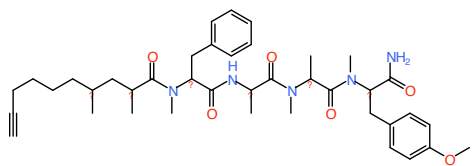

|                                                                                   |      |   |      |
|-----------------------------------------------------------------------------------|------|---|------|
| 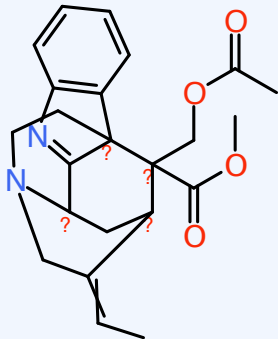 | N463 | A | 0.75 |
|-----------------------------------------------------------------------------------|------|---|------|

|                                                                                    |      |   |      |
|------------------------------------------------------------------------------------|------|---|------|
| 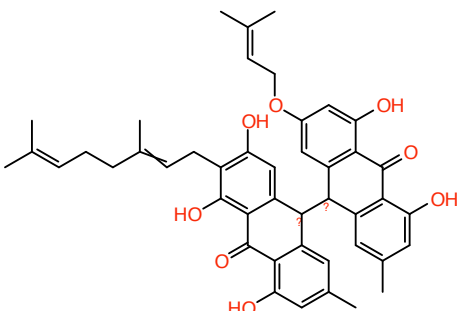 | N495 | A | -0.5 |
|------------------------------------------------------------------------------------|------|---|------|

|                                                                                     |      |   |      |
|-------------------------------------------------------------------------------------|------|---|------|
| 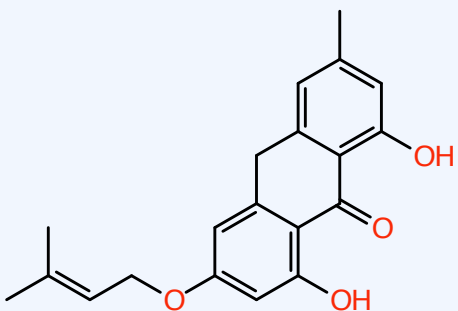 | N435 | A | 0.75 |
|-------------------------------------------------------------------------------------|------|---|------|

|                                                                                     |      |   |       |
|-------------------------------------------------------------------------------------|------|---|-------|
| 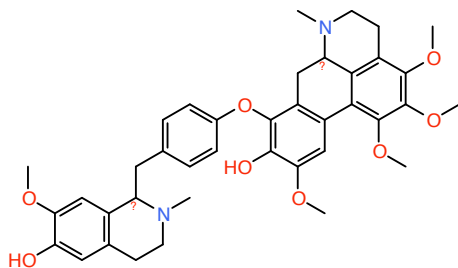 | N366 | A | -0.25 |
|-------------------------------------------------------------------------------------|------|---|-------|

| Structure of Smiles                                                                 | ID   | Activity_Status | Consensus_score |
|-------------------------------------------------------------------------------------|------|-----------------|-----------------|
| 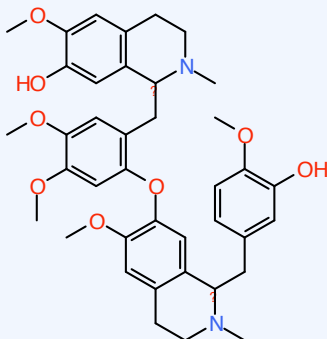   | N388 | A               | -0.25           |
|    | N357 | A               | 0               |
|   | N389 | A               | -0.25           |
|  | N401 | A               | 1               |
|  | N447 | A               | 0               |

| Structure of Smiles                                                                 | ID   | Activity_Status | Consensus_score |
|-------------------------------------------------------------------------------------|------|-----------------|-----------------|
| 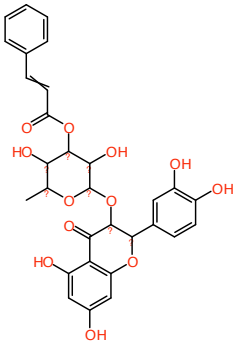   | N627 | A               | 0               |
|    | N544 | A               | -0.5            |
|   | N636 | A               | -0.5            |
|  | N592 | A               | -0.25           |
|  | N434 | A               | 0               |

| Structure of Smiles                                                                 | ID   | Activity_Status | Consensus_score |
|-------------------------------------------------------------------------------------|------|-----------------|-----------------|
| 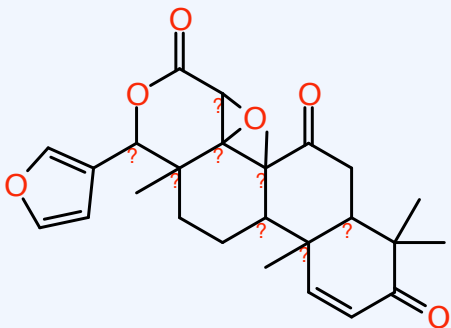   | N591 | A               | 0.75            |
|    | N519 | A               | 0.75            |
|   | N382 | A               | 0.75            |
|  | N581 | A               | 0.75            |
|  | N523 | A               | 0.25            |

| Structure of Smiles                                                                 | ID   | Activity_Status | Consensus_score |
|-------------------------------------------------------------------------------------|------|-----------------|-----------------|
| 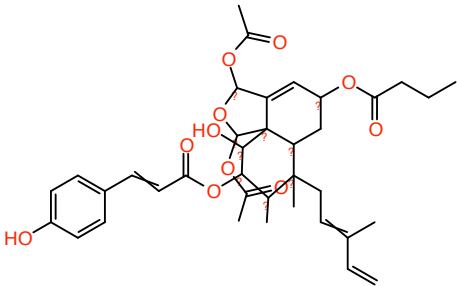   | N552 | A               | -0.5            |
|    | N629 | A               | 0               |
|   | N334 | A               | -0.5            |
|  | N367 | A               | 0.5             |
|  | N635 | A               | 0               |



| Structure of Smiles                                                                 | ID   | Activity_Status | Consensus_score |
|-------------------------------------------------------------------------------------|------|-----------------|-----------------|
| 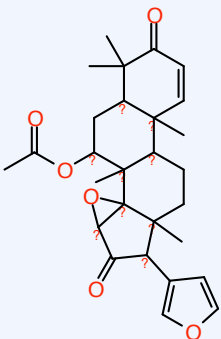   | N413 | A               | 0.5             |
|    | N380 | A               | 0               |
|   | N359 | A               | 0.25            |
|  | N602 | A               | 0.75            |
|  | N529 | A               | 0.75            |

| Structure of Smiles | ID | Activity_Status | Consensus_score |
|---------------------|----|-----------------|-----------------|
|---------------------|----|-----------------|-----------------|

N633

A

0.75

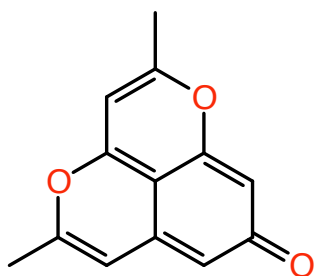

N385

A

0.75

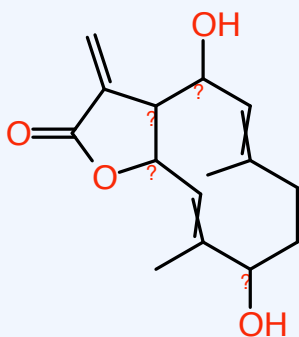

N386

A

0.75

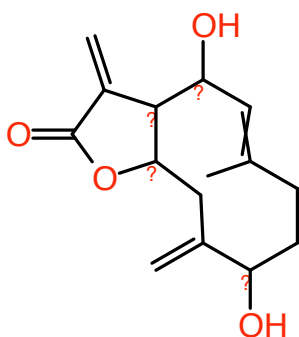

N404

A

0.75

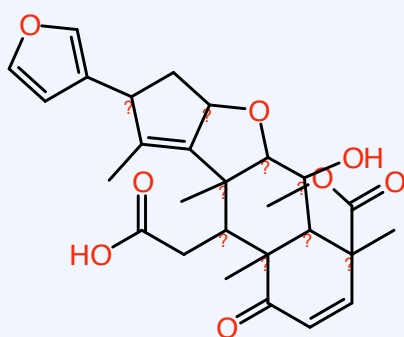

N486

A

0.75

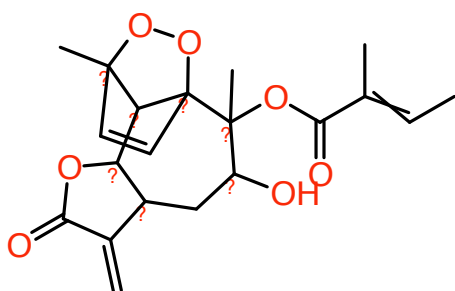

| Structure of Smiles                                                                 | ID   | Activity_Status | Consensus_score |
|-------------------------------------------------------------------------------------|------|-----------------|-----------------|
| 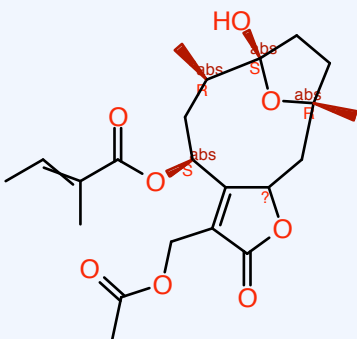   | N571 | A               | 0.75            |
|    | N615 | A               | 0.75            |
|   | N557 | A               | 0.75            |
|  | N565 | A               | 0.75            |
|  | N641 | A               | 0.5             |

| Structure of Smiles                                                                 | ID   | Activity_Status | Consensus_score |
|-------------------------------------------------------------------------------------|------|-----------------|-----------------|
| 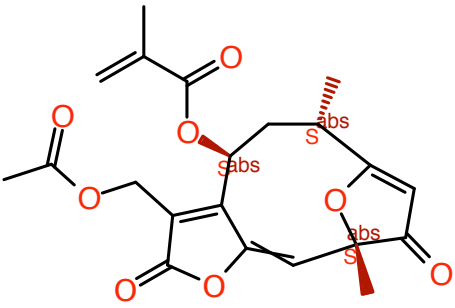   | N607 | A               | 0.75            |
|    | N457 | A               | 0               |
|   | N464 | A               | 0.75            |
|  | N355 | A               | 1               |
|  | N436 | A               | 1               |

| Structure of Smiles                                                                 | ID   | Activity_Status | Consensus_score |
|-------------------------------------------------------------------------------------|------|-----------------|-----------------|
| 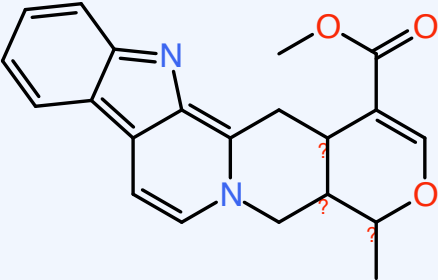   | N480 | A               | 0.75            |
|    | N479 | A               | 0.75            |
|   | N20  | A               | 0.25            |
|  | N569 | A               | 0.75            |
|  | N649 | A               | 0.75            |

| Structure of Smiles                                                                 | ID   | Activity_Status | Consensus_score |
|-------------------------------------------------------------------------------------|------|-----------------|-----------------|
| 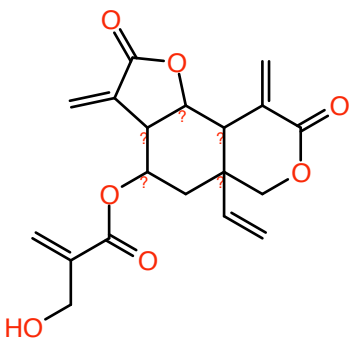   | N373 | A               | 0.75            |
|    | N467 | A               | 0.75            |
|   | N337 | A               | 0.25            |
|  | N439 | A               | 0.25            |
|  | N15  | A               | 0.75            |

| Structure of Smiles                                                                 | ID   | Activity_Status | Consensus_score |
|-------------------------------------------------------------------------------------|------|-----------------|-----------------|
| 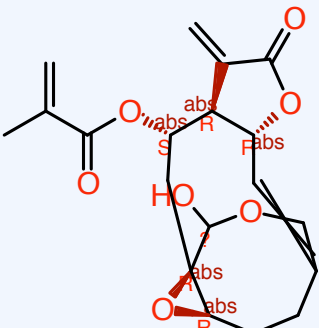   | N546 | A               | 0.75            |
|    | N499 | A               | 0.75            |
|   | N370 | A               | 0               |
|  | N425 | A               | 0.75            |
|  | N566 | A               | 0.75            |

| Structure of Smiles | ID | Activity_Status | Consensus_score |
|---------------------|----|-----------------|-----------------|
|---------------------|----|-----------------|-----------------|

N345

A

0

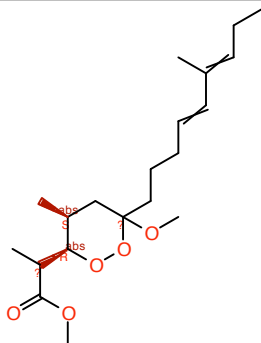

N498

A

0.25

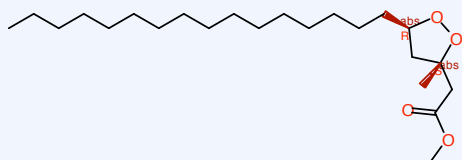

N586

A

0.25

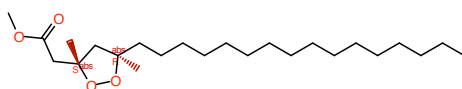

N396

A

0.75

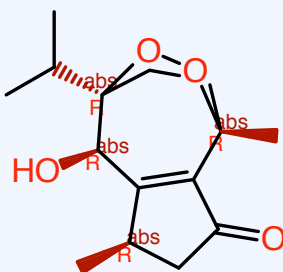

N454

A

0.25

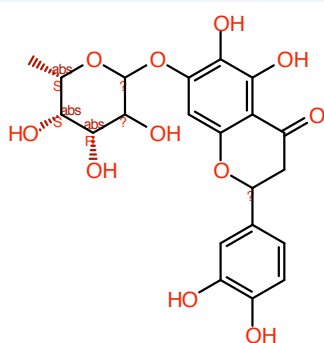



| Structure of Smiles                                                                 | ID   | Activity_Status | Consensus_score |
|-------------------------------------------------------------------------------------|------|-----------------|-----------------|
| 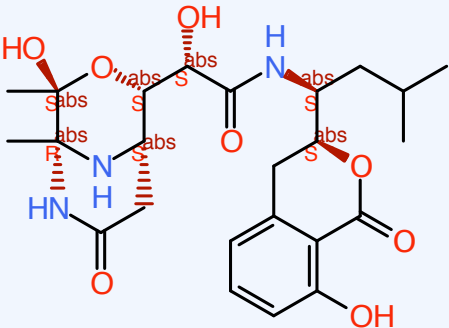   | N460 | A               | 0.25            |
|    | N588 | A               | 0               |
|   | N453 | A               | -0.25           |
|  | N473 | A               | 0.75            |
|  | N491 | A               | 0.75            |

| Structure of Smiles                                                                 | ID   | Activity_Status | Consensus_score |
|-------------------------------------------------------------------------------------|------|-----------------|-----------------|
| 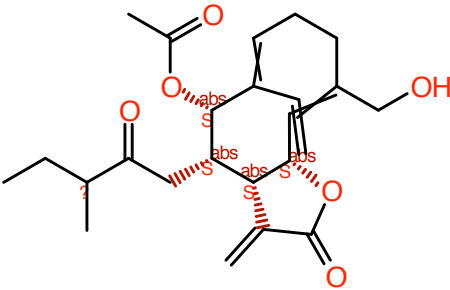   | N461 | A               | 0.5             |
|    | N432 | A               | 0.75            |
|   | N3   | A               | 0.75            |
|  | N358 | A               | 0               |
|  | N594 | A               | 0.75            |

| Structure of Smiles                                                                 | ID   | Activity_Status | Consensus_score |
|-------------------------------------------------------------------------------------|------|-----------------|-----------------|
| 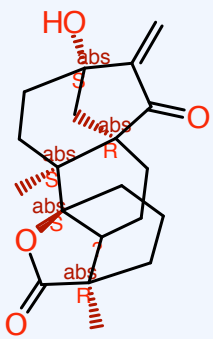   | N445 | A               | 0.75            |
|    | N403 | A               | 0.75            |
|   | N526 | A               | 0               |
|  | N530 | A               | -0.5            |
|  | N622 | A               | -0.5            |

| Structure of Smiles                                                                 | ID   | Activity_Status | Consensus_score |
|-------------------------------------------------------------------------------------|------|-----------------|-----------------|
| 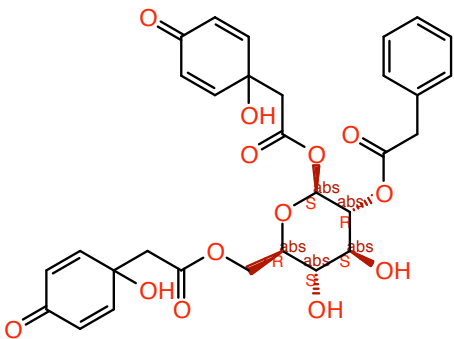   | N331 | A               | 0               |
|    | N384 | A               | 0               |
|   | N606 | A               | -0.25           |
|  | N506 | A               | 0.5             |
|  | N501 | A               | 0.5             |

| Structure of Smiles                                                                 | ID   | Activity_Status | Consensus_score |
|-------------------------------------------------------------------------------------|------|-----------------|-----------------|
| 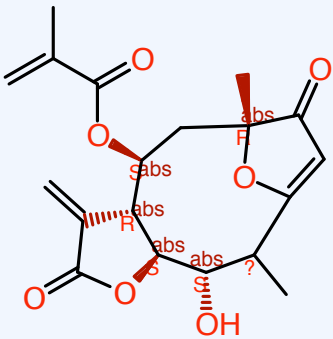   | N603 | A               | 0.75            |
|    | N507 | A               | 0.75            |
|   | N505 | A               | 0.75            |
|  | N500 | A               | 0.5             |
|  | N354 | A               | 0               |

| Structure of Smiles | ID | Activity_Status | Consensus_score |
|---------------------|----|-----------------|-----------------|
|---------------------|----|-----------------|-----------------|

N621

A

-0.75

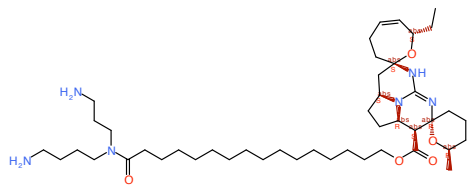

N531

A

0.75

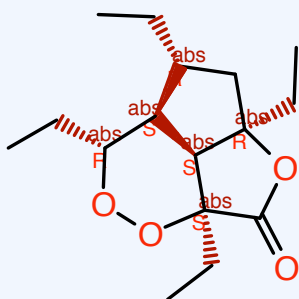

N648

A

0.25

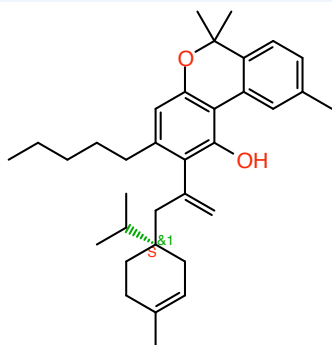

N340

A

0

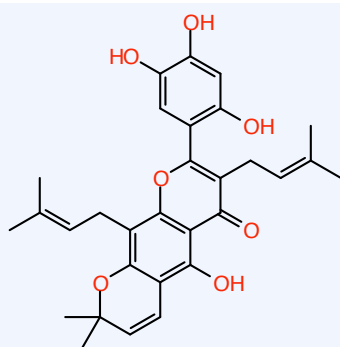

N617

A

0.25

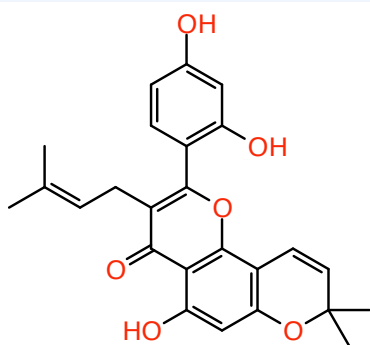

| Structure of Smiles                                                                 | ID   | Activity_Status | Consensus_score |
|-------------------------------------------------------------------------------------|------|-----------------|-----------------|
| 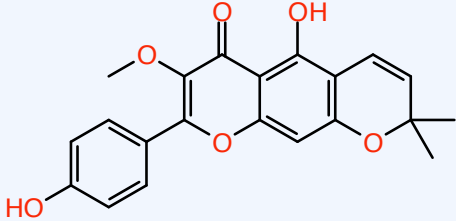   | N540 | A               | 1               |
|    | N441 | A               | -0.25           |
|   | N483 | A               | 0.25            |
|  | N452 | A               | 0.25            |
|  | N470 | A               | 0.25            |

| Structure of Smiles                                                                 | ID   | Activity_Status | Consensus_score |
|-------------------------------------------------------------------------------------|------|-----------------|-----------------|
| 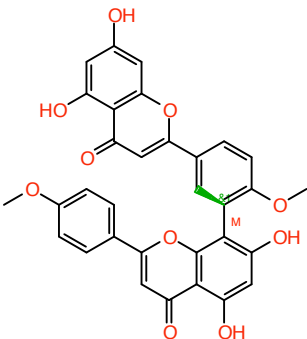   | N545 | A               | -0.25           |
|    | N378 | A               | -0.25           |
|   | N577 | A               | 1               |
|  | N363 | A               | 0.5             |
|  | N482 | A               | 0.25            |



| Structure of Smiles                                                                 | ID   | Activity_Status | Consensus_score |
|-------------------------------------------------------------------------------------|------|-----------------|-----------------|
| 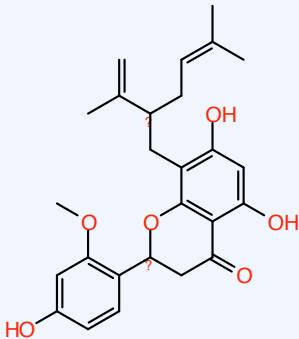   | N451 | A               | 0.25            |
|    | N469 | A               | 0.25            |
|   | N326 | A               | -0.5            |
|  | N508 | A               | 0.25            |
|  | N504 | A               | 0.25            |

| Structure of Smiles                                                                 | ID   | Activity_Status | Consensus_score |
|-------------------------------------------------------------------------------------|------|-----------------|-----------------|
| 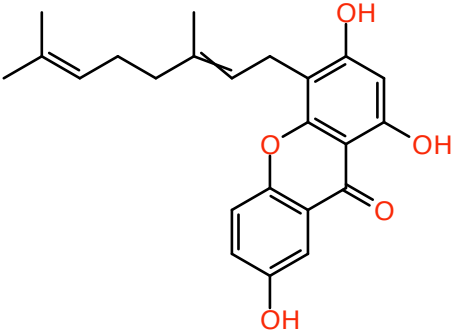   | N360 | A               | 0.25            |
|    | N365 | A               | 0.25            |
|   | N539 | A               | 1               |
|  | N547 | A               | 0.25            |
|  | N353 | A               | 0.25            |

| Structure of Smiles                                                                 | ID   | Activity_Status | Consensus_score |
|-------------------------------------------------------------------------------------|------|-----------------|-----------------|
| 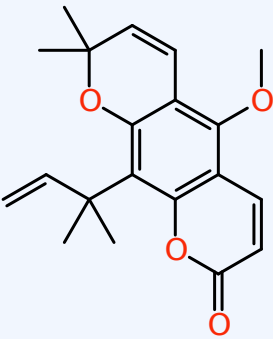   | N398 | A               | 0.75            |
|    | N409 | A               | 0.75            |
|   | N575 | A               | 0.25            |
|  | N509 | A               | 0.25            |
|  | N487 | A               | 1               |

| Structure of Smiles                                                                 | ID   | Activity_Status | Consensus_score |
|-------------------------------------------------------------------------------------|------|-----------------|-----------------|
| 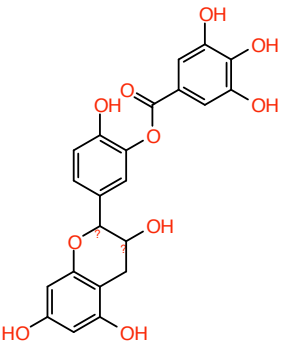   | N333 | A               | 0               |
|    | N352 | A               | 0               |
|   | N513 | A               | 0.75            |
|  | N553 | A               | 0.75            |
|  | N405 | A               | 1               |

| Structure of Smiles                                                                 | ID   | Activity_Status | Consensus_score |
|-------------------------------------------------------------------------------------|------|-----------------|-----------------|
| 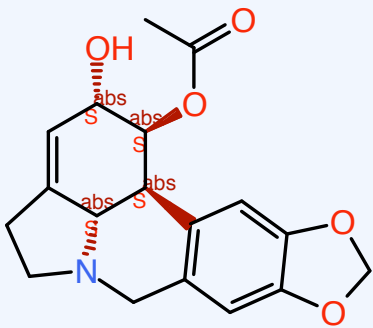   | N515 | A               | 0.75            |
|    | N339 | A               | 0.75            |
|   | N410 | A               | 0.75            |
|  | N402 | A               | 0.5             |
|  | N466 | A               | 0.75            |

| Structure of Smiles                                                                 | ID   | Activity_Status | Consensus_score |
|-------------------------------------------------------------------------------------|------|-----------------|-----------------|
| 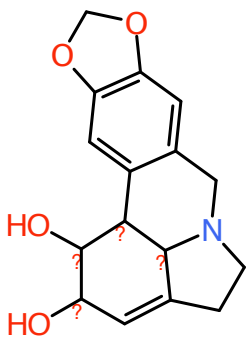   | N449 | A               | 0.75            |
|    | N645 | A               | 0.75            |
|   | N520 | A               | 0.75            |
|  | N422 | A               | 0.25            |
|  | N448 | A               | 0.25            |

| Structure of Smiles                                                                 | ID   | Activity_Status | Consensus_score |
|-------------------------------------------------------------------------------------|------|-----------------|-----------------|
| 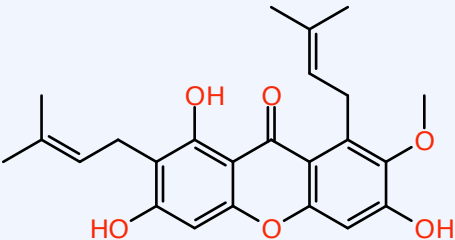   | N589 | A               | 0.25            |
|    | N524 | A               | 0.25            |
|   | N344 | A               | 0.25            |
|  | N573 | A               | 0.25            |
|  | N362 | A               | 0.25            |

| Structure of Smiles | ID   | Activity_Status | Consensus_score |
|---------------------|------|-----------------|-----------------|
|                     | N555 | A               | 0.25            |

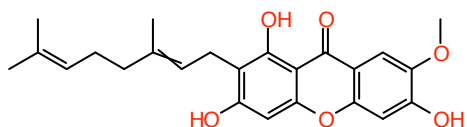

N525

A

1

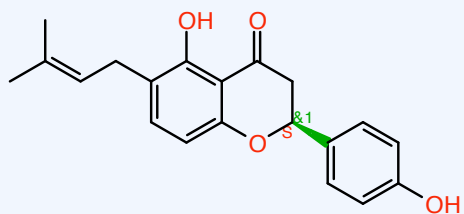

N554

A

1

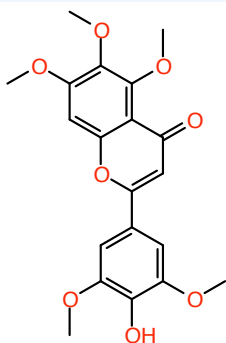

N372

A

0.25

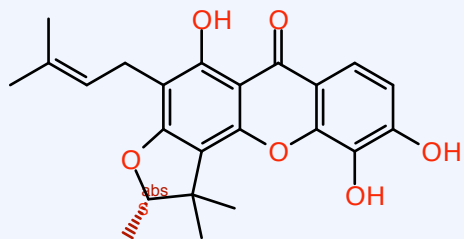

N348

A

-0.25

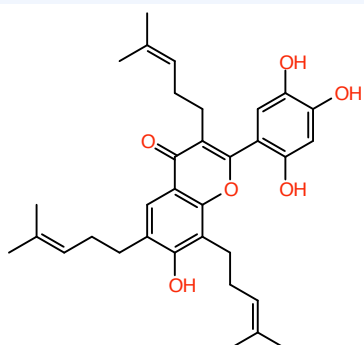



| Structure of Smiles                                                                 | ID   | Activity_Status | Consensus_score |
|-------------------------------------------------------------------------------------|------|-----------------|-----------------|
| 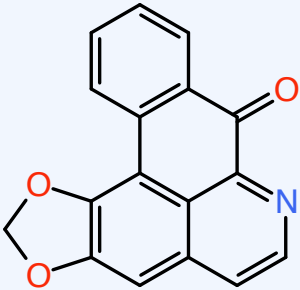   | N468 | A               | 0.75            |
|    | N485 | A               | 0.75            |
|   | N364 | A               | 0               |
|  | N562 | A               | 0.5             |
|  | N639 | A               | 0               |

| Structure of Smiles                                                                 | ID   | Activity_Status | Consensus_score |
|-------------------------------------------------------------------------------------|------|-----------------|-----------------|
| 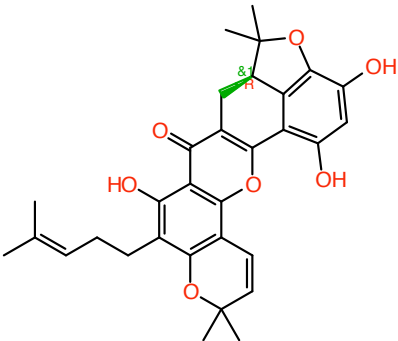   | N628 | A               | 0               |
|    | N350 | A               | 0               |
|   | N391 | A               | 0               |
|  | N527 | A               | 0               |
|  | N609 | A               | 0               |

| Structure of Smiles                                                                 | ID   | Activity_Status | Consensus_score |
|-------------------------------------------------------------------------------------|------|-----------------|-----------------|
| 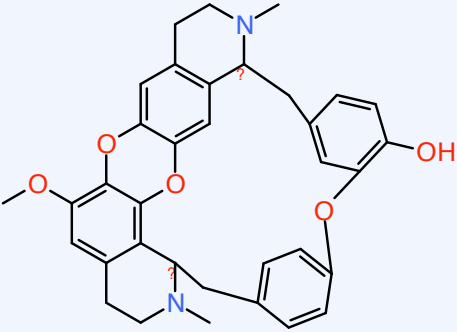   | N347 | A               | 0               |
|    | N412 | A               | 0.25            |
|   | N489 | A               | 1               |
|  | N598 | A               | 1               |
|  | N393 | A               | 0               |

| Structure of Smiles                                                                 | ID   | Activity_Status | Consensus_score |
|-------------------------------------------------------------------------------------|------|-----------------|-----------------|
| 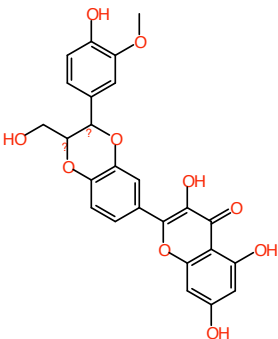   | N419 | A               | 0.25            |
|    | N561 | A               | 0               |
|   | N392 | A               | 0               |
|  | N543 | A               | 0.75            |
|  | N634 | A               | 0               |

| Structure of Smiles                                                                 | ID   | Activity_Status | Consensus_score |
|-------------------------------------------------------------------------------------|------|-----------------|-----------------|
| 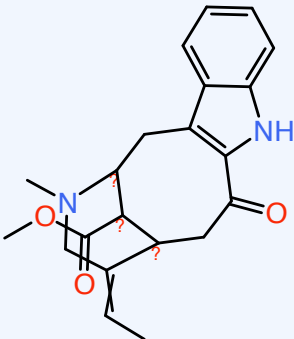   | N369 | A               | 0.75            |
|    | N558 | A               | 0.25            |
|   | N548 | A               | 0.25            |
|  | N535 | A               | 0.75            |
|  | N580 | A               | 0.5             |

| Structure of Smiles | ID | Activity_Status | Consensus_score |
|---------------------|----|-----------------|-----------------|
|---------------------|----|-----------------|-----------------|

N429

A

1

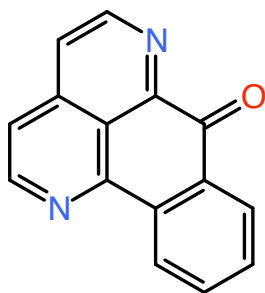

N631

A

0.75

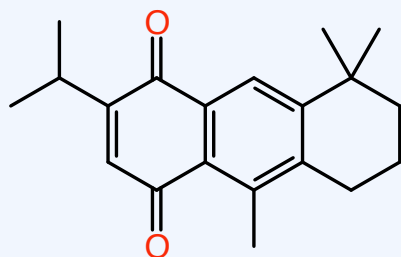

N383

A

0.75

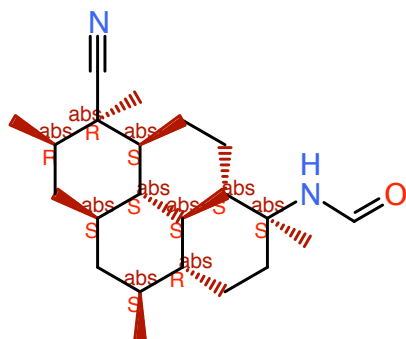

N576

A

0

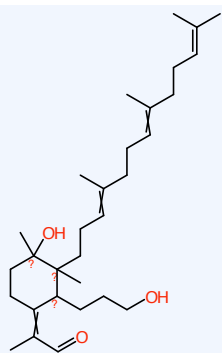

N550

A

0.25

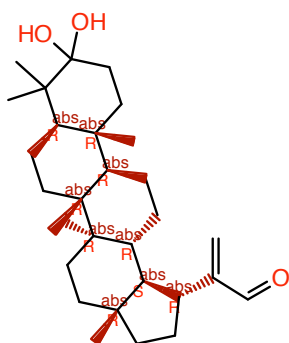

| Structure of Smiles                                                                 | ID   | Activity_Status | Consensus_score |
|-------------------------------------------------------------------------------------|------|-----------------|-----------------|
| 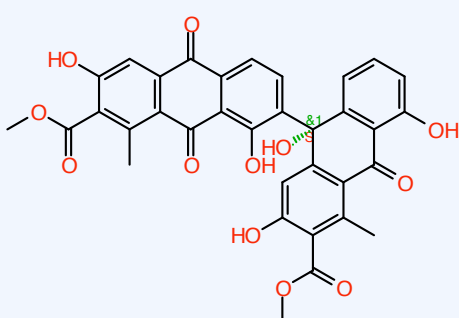   | N582 | A               | -0.5            |
|    | N623 | A               | 0.75            |
|   | N625 | A               | 0.75            |
|  | N428 | A               | 0.25            |
|  | N630 | A               | 0.25            |

| Structure of Smiles                                                                 | ID   | Activity_Status | Consensus_score |
|-------------------------------------------------------------------------------------|------|-----------------|-----------------|
| 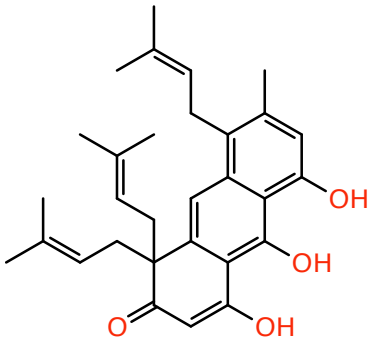   | N488 | A               | 0.25            |
|    | N559 | A               | 0.25            |
|   | N406 | A               | 0.25            |
|  | N593 | A               | 0.75            |
|  | N443 | A               | 0.25            |



| Structure of Smiles                                                                 | ID   | Activity_Status | Consensus_score |
|-------------------------------------------------------------------------------------|------|-----------------|-----------------|
| 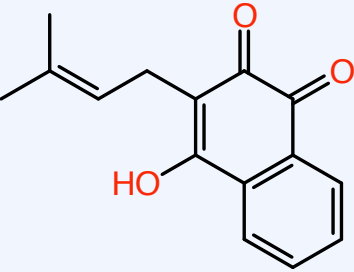   | N642 | A               | 1               |
|    | N556 | A               | 0.75            |
|   | N411 | A               | 0.75            |
|  | N399 | A               | 0.75            |
|  | N579 | A               | 0.25            |

| Structure of Smiles | ID | Activity_Status | Consensus_score |
|---------------------|----|-----------------|-----------------|
|---------------------|----|-----------------|-----------------|

N601

A

0.25

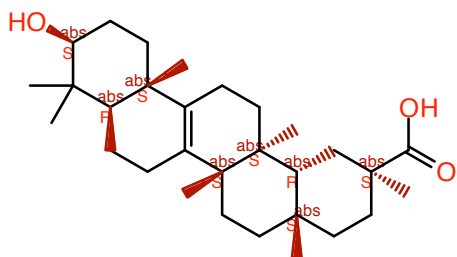

N431

A

0.5

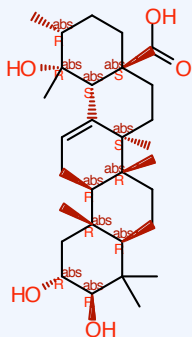

N444

A

1

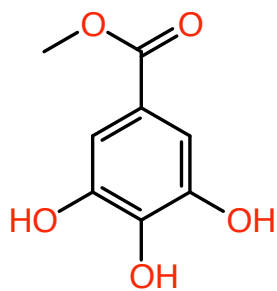

N476

A

0.5

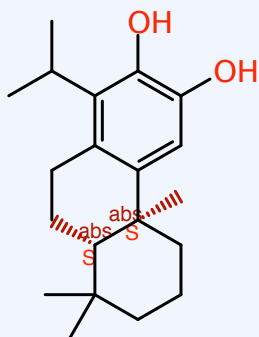

N563

A

0.25

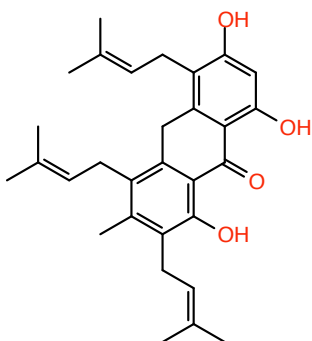

| Structure of Smiles                                                                 | ID   | Activity_Status | Consensus_score |
|-------------------------------------------------------------------------------------|------|-----------------|-----------------|
| 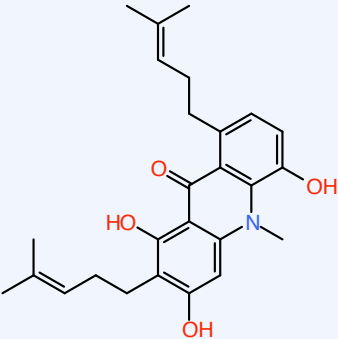   | N481 | A               | 0.25            |
|    | N477 | A               | -0.75           |
|   | N585 | A               | 1               |
|  | N456 | A               | 0.25            |
|  | N424 | A               | 0.25            |

| Structure of Smiles                                                                 | ID   | Activity_Status | Consensus_score |
|-------------------------------------------------------------------------------------|------|-----------------|-----------------|
| 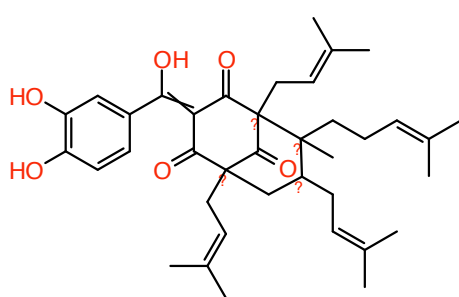   | N522 | A               | -0.25           |
|    | N332 | A               | 1               |
|   | N583 | A               | 0.75            |
|  | N374 | A               | 0.75            |
|  | N533 | A               | 0.5             |

| Structure of Smiles                                                                 | ID   | Activity_Status | Consensus_score |
|-------------------------------------------------------------------------------------|------|-----------------|-----------------|
| 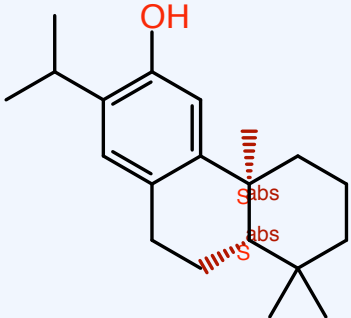   | N541 | A               | 0.5             |
|    | N371 | A               | 0.25            |
|   | N572 | A               | 1               |
|  | N343 | A               | 1               |
|  | N551 | A               | 0.75            |

| Structure of Smiles | ID | Activity_Status | Consensus_score |
|---------------------|----|-----------------|-----------------|
|---------------------|----|-----------------|-----------------|

N335

A

0.75

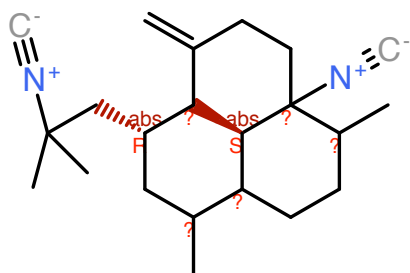

N17

A

1

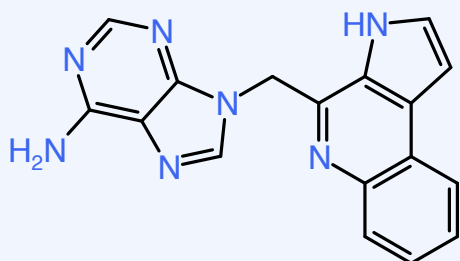

N387

A

1

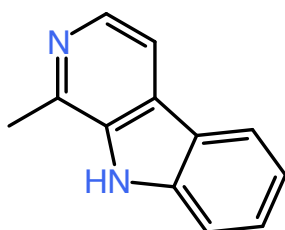

N328

A

0.75

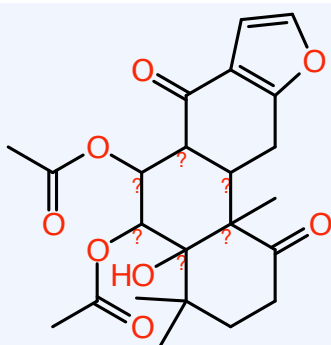

N518

A

0.75

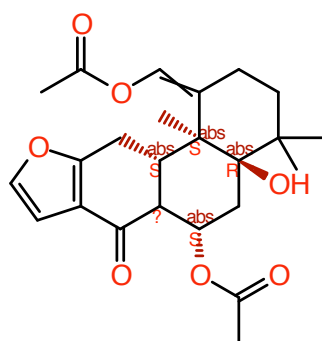

| Structure of Smiles                                                                 | ID   | Activity_Status | Consensus_score |
|-------------------------------------------------------------------------------------|------|-----------------|-----------------|
| 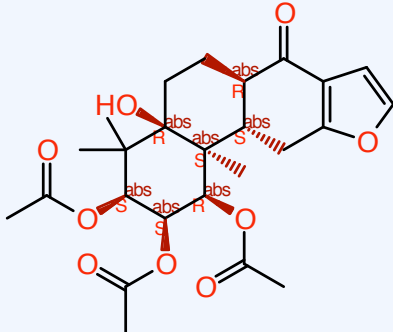   | N438 | A               | 0.75            |
|    | N407 | A               | 0.75            |
|   | N568 | A               | 0.75            |
|  | N492 | A               | 0.75            |
|  | N327 | A               | 0.75            |

| Structure of Smiles                                                                 | ID   | Activity_Status | Consensus_score |
|-------------------------------------------------------------------------------------|------|-----------------|-----------------|
| 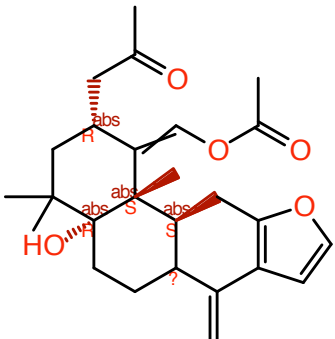   | N417 | A               | 0.75            |
|    | N537 | A               | 0.75            |
|   | N450 | A               | 0.75            |
|  | N584 | A               | 0.75            |
|  | N496 | A               | 1               |



| Structure of Smiles                                                                 | ID   | Activity_Status | Consensus_score |
|-------------------------------------------------------------------------------------|------|-----------------|-----------------|
| 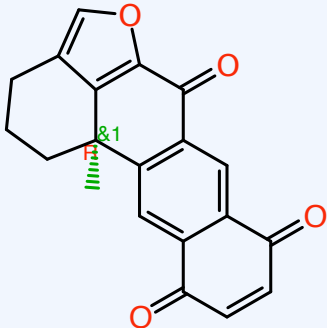   | N346 | A               | 1               |
|    | N511 | A               | 1               |
|   | N19  | A               | 0.25            |
|  | N596 | A               | 0.25            |
|  | N465 | A               | 0.25            |

| Structure of Smiles                                                                 | ID           | Activity_Status | Consensus_score |
|-------------------------------------------------------------------------------------|--------------|-----------------|-----------------|
| 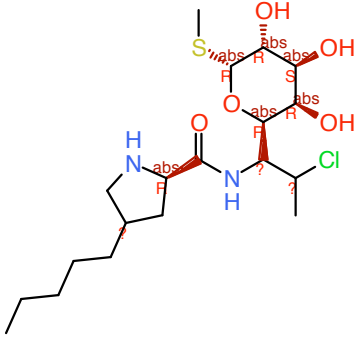   | Mirincamycin | CRAD            | 0.75            |
|    | Halofantrine | CRAD            | 0               |
|   | Lumefantrine | CRAD            | 0               |
|  | Pyronaridine | CRAD            | 0.5             |
|  | Piperaquine  | CRAD            | 0.5             |

| Structure of Smiles                                                                 | ID                   | Activity_Status | Consensus_score |
|-------------------------------------------------------------------------------------|----------------------|-----------------|-----------------|
| 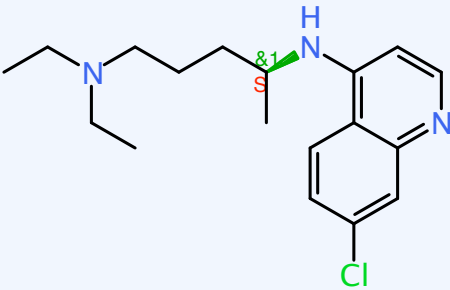   | Chloroquine          | CRAD            | 1               |
|    | Hydroxychloroquine   | CRAD            | 1               |
|   | Amodiaquine          | CRAD            | 1               |
|  | Cycloguanil Embonate | CRAD            | 1               |
|  | Proguanil            | CRAD            | 0.75            |

| Structure of Smiles | ID | Activity_Status | Consensus_score |
|---------------------|----|-----------------|-----------------|
|---------------------|----|-----------------|-----------------|

Pyrimethamine

CRAD

1

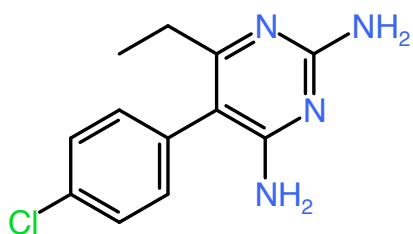

Tebuquine

CRAD

0.75

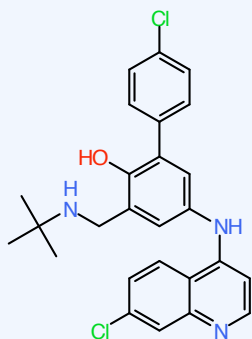

Atovaquone

CRAD

0.75

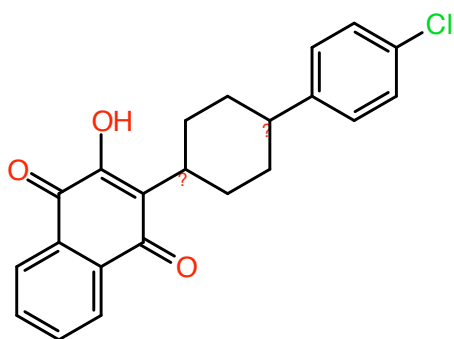

Mefloquine

CRAD

1

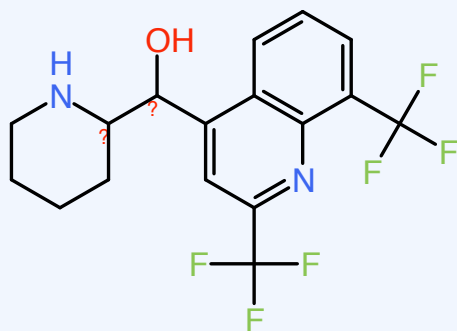

Arteflene

CRAD

0.5

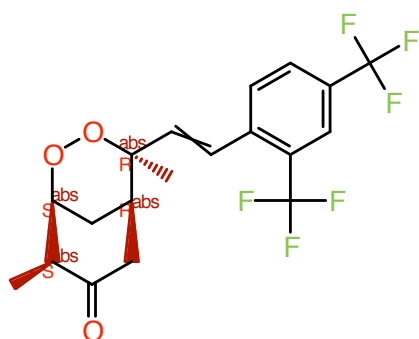

| Structure of Smiles                                                                 | ID          | Activity_Status | Consensus_score |
|-------------------------------------------------------------------------------------|-------------|-----------------|-----------------|
| 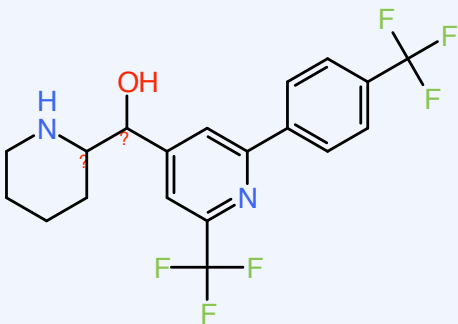   | Enpiroline  | CRAD            | 0.75            |
|    | Primaquine  | CRAD            | 1               |
|   | Quinine     | CRAD            | 1               |
|  | Artemisinin | CRAD            | 0.75            |
|  | Artesunate  | CRAD            | 0.75            |

| Structure of Smiles | ID | Activity_Status | Consensus_score |
|---------------------|----|-----------------|-----------------|
|---------------------|----|-----------------|-----------------|

Arteminol

CRAD

0.75

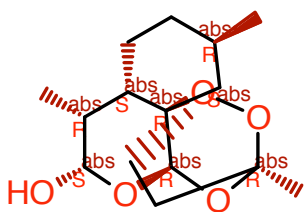

Artemether

CRAD

0.75

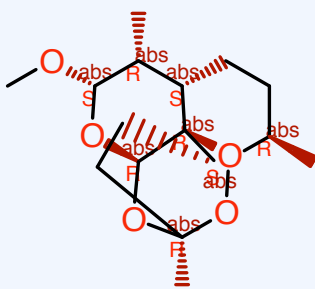

Artemotil

CRAD

0.75

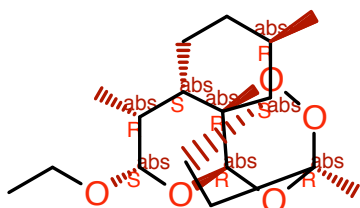

Menoctone

CRAD

0.5

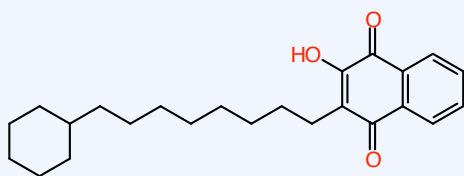

Amquinate

CRAD

1

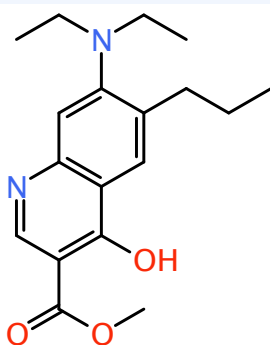

| Structure of Smiles                                                                 | ID                | Activity_Status | Consensus_score |
|-------------------------------------------------------------------------------------|-------------------|-----------------|-----------------|
| 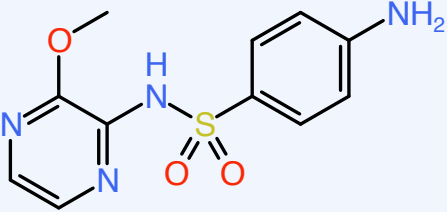   | Sulfametopyrazine | CRAD            | 1               |
|    | Acedapsone        | CRAD            | 1               |
|   | N163              | HA              | 0.75            |
|  | N130              | HA              | 1               |
|  | N232              | HA              | 0.5             |

| Structure of Smiles                                                                 | ID   | Activity_Status | Consensus_score |
|-------------------------------------------------------------------------------------|------|-----------------|-----------------|
| 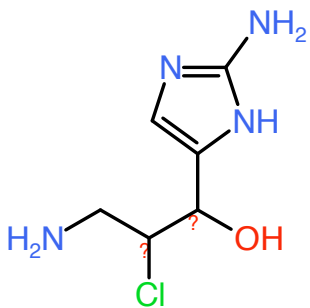   | N192 | HA              | 1               |
|    | N79  | HA              | 0.75            |
|   | N100 | HA              | 0.75            |
|  | N270 | HA              | 1               |
|  | N164 | HA              | 1               |



| Structure of Smiles                                                                 | ID   | Activity_Status | Consensus_score |
|-------------------------------------------------------------------------------------|------|-----------------|-----------------|
| 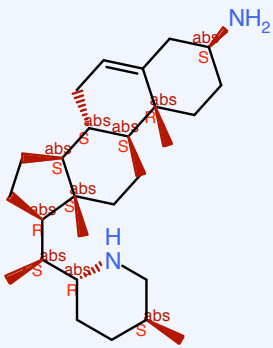   | N118 | HA              | 0.25            |
|    | N211 | HA              | 0.5             |
|   | N253 | HA              | 0               |
|  | N321 | HA              | 0.25            |
|  | N124 | HA              | 0.75            |

| Structure of Smiles                                                                 | ID   | Activity_Status | Consensus_score |
|-------------------------------------------------------------------------------------|------|-----------------|-----------------|
| 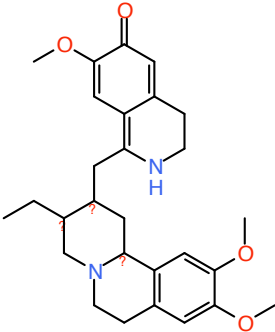   | N221 | HA              | 0.5             |
|    | N298 | HA              | 0.25            |
|   | N218 | HA              | 0.75            |
|  | N200 | HA              | 0.5             |
|  | N196 | HA              | 0.25            |

| Structure of Smiles                                                                 | ID   | Activity_Status | Consensus_score |
|-------------------------------------------------------------------------------------|------|-----------------|-----------------|
| 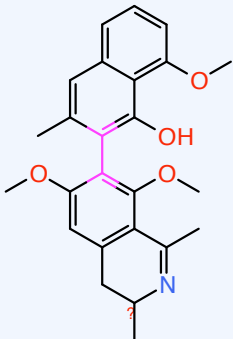   | N201 | HA              | 0.25            |
|    | N266 | HA              | 0.5             |
|   | N242 | HA              | 0.75            |
|  | N136 | HA              | 0.75            |
|  | N254 | HA              | 0.75            |

| Structure of Smiles                                                                 | ID   | Activity_Status | Consensus_score |
|-------------------------------------------------------------------------------------|------|-----------------|-----------------|
| 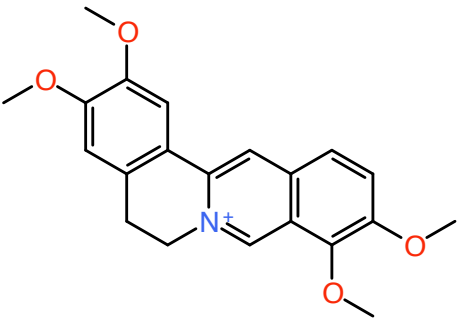   | N302 | HA              | 1               |
|    | N103 | HA              | 0.75            |
|   | N173 | HA              | -0.75           |
|  | N213 | HA              | 0.5             |
|  | N230 | HA              | 0.5             |

| Structure of Smiles                                                                 | ID   | Activity_Status | Consensus_score |
|-------------------------------------------------------------------------------------|------|-----------------|-----------------|
| 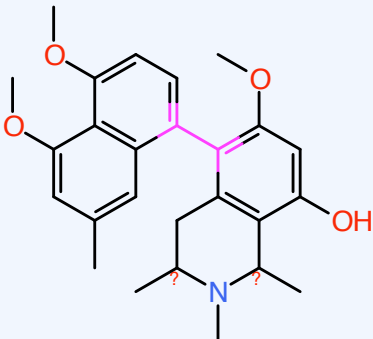   | N235 | HA              | 0.25            |
|    | N223 | HA              | 1               |
|   | N282 | HA              | 1               |
|  | N187 | HA              | 1               |
|  | N102 | HA              | 0.5             |

| Structure of Smiles                                                                 | ID   | Activity_Status | Consensus_score |
|-------------------------------------------------------------------------------------|------|-----------------|-----------------|
| 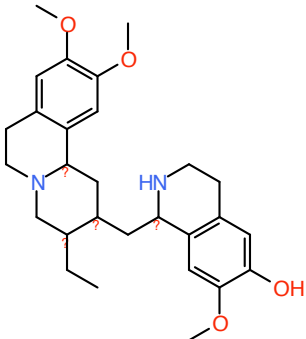   | N135 | HA              | 0.75            |
|    | N285 | HA              | 1               |
|   | N129 | HA              | 0.75            |
|  | N228 | HA              | 0               |
|  | N111 | HA              | 0.75            |

| Structure of Smiles                                                                 | ID   | Activity_Status | Consensus_score |
|-------------------------------------------------------------------------------------|------|-----------------|-----------------|
| 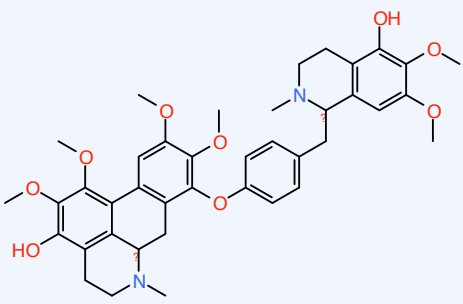   | N229 | HA              | -0.25           |
|    | N171 | HA              | 0               |
|   | N237 | HA              | 0.5             |
|  | N292 | HA              | 0.75            |
|  | N84  | HA              | 0               |

| Structure of Smiles                                                                 | ID   | Activity_Status | Consensus_score |
|-------------------------------------------------------------------------------------|------|-----------------|-----------------|
| 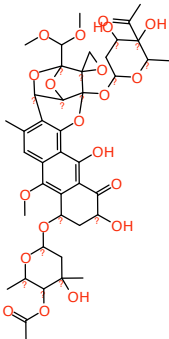   | N83  | HA              | -0.25           |
|    | N86  | HA              | 0.25            |
|   | N99  | HA              | 0.25            |
|  | N249 | HA              | 0               |
|  | N272 | HA              | 0               |



| Structure of Smiles                                                                 | ID   | Activity_Status | Consensus_score |
|-------------------------------------------------------------------------------------|------|-----------------|-----------------|
| 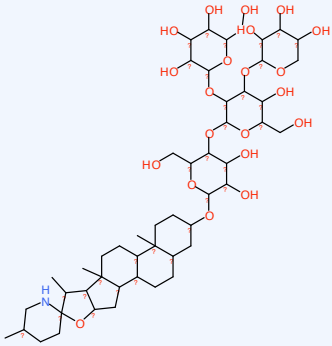   | N290 | HA              | -0.5            |
|    | N299 | HA              | 0               |
|   | N287 | HA              | 0               |
|  | N281 | HA              | -0.25           |
|  | N215 | HA              | -0.25           |

| Structure of Smiles                                                                 | ID   | Activity_Status | Consensus_score |
|-------------------------------------------------------------------------------------|------|-----------------|-----------------|
| 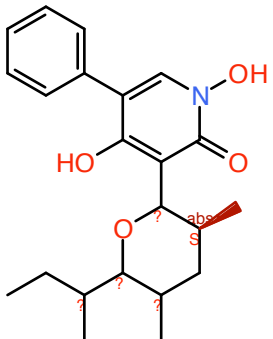   | N260 | HA              | 1               |
|    | N202 | HA              | 0.75            |
|   | N174 | HA              | 0.75            |
|  | N209 | HA              | 0.25            |
|  | N240 | HA              | 0.25            |

| Structure of Smiles                                                                 | ID   | Activity_Status | Consensus_score |
|-------------------------------------------------------------------------------------|------|-----------------|-----------------|
| 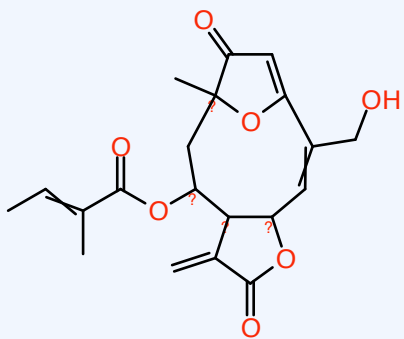   | N310 | HA              | 0.75            |
|    | N117 | HA              | 0.75            |
|   | N318 | HA              | 0.75            |
|  | N280 | HA              | 0.75            |
|  | N80  | HA              | 1               |

| Structure of Smiles                                                                 | ID   | Activity_Status | Consensus_score |
|-------------------------------------------------------------------------------------|------|-----------------|-----------------|
| 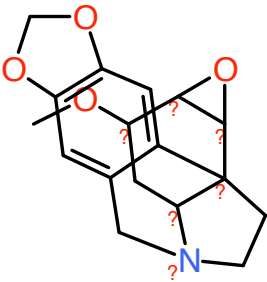   | N251 | HA              | 0.75            |
|    | N303 | HA              | 0.75            |
|   | N141 | HA              | 0.5             |
|  | N309 | HA              | 0.75            |
|  | N121 | HA              | 0.75            |

| Structure of Smiles                                                                 | ID   | Activity_Status | Consensus_score |
|-------------------------------------------------------------------------------------|------|-----------------|-----------------|
| 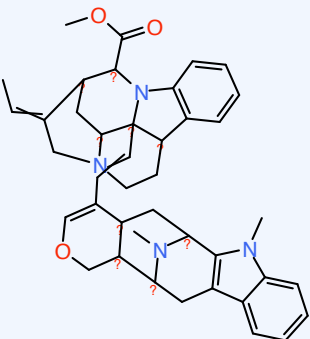   | N238 | HA              | 0               |
|    | N126 | HA              | 0               |
|   | N189 | HA              | 0.75            |
|  | N283 | HA              | 0.75            |
|  | N116 | HA              | 0.25            |

| Structure of Smiles | ID | Activity_Status | Consensus_score |
|---------------------|----|-----------------|-----------------|
|---------------------|----|-----------------|-----------------|

N87

HA

0

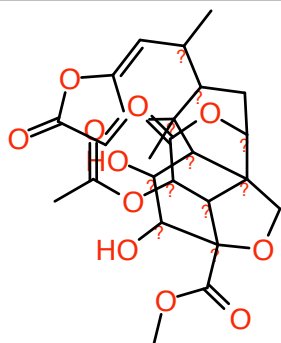

N82

HA

0

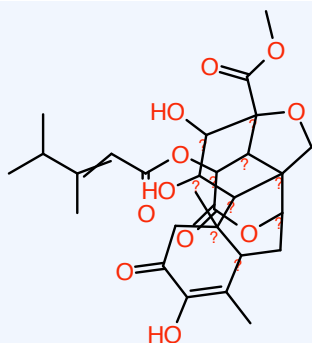

N95

HA

0

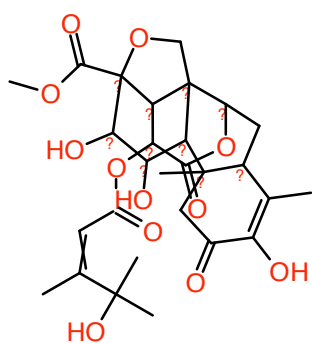

N90

HA

0

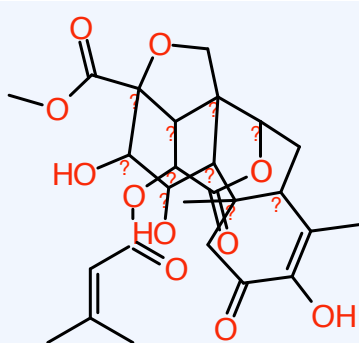

N115

HA

0

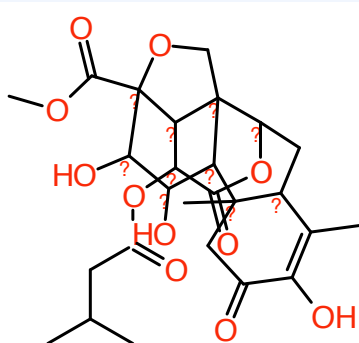

| Structure of Smiles                                                                 | ID   | Activity_Status | Consensus_score |
|-------------------------------------------------------------------------------------|------|-----------------|-----------------|
| 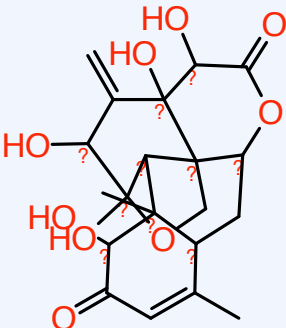   | N150 | HA              | 0.25            |
|    | N193 | HA              | 0.25            |
|   | N122 | HA              | 0.25            |
|  | N137 | HA              | 0.75            |
|  | N92  | HA              | 0.75            |

| Structure of Smiles                                                                 | ID   | Activity_Status | Consensus_score |
|-------------------------------------------------------------------------------------|------|-----------------|-----------------|
| 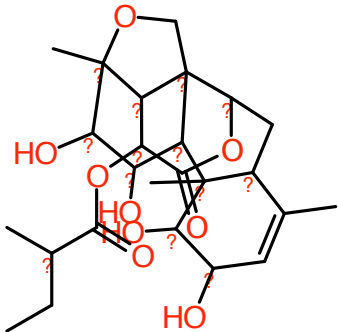   | N91  | HA              | 0.5             |
|    | N153 | HA              | 0.75            |
|   | N127 | HA              | 0               |
|  | N106 | HA              | 0.75            |
|  | N94  | HA              | 0.75            |



| Structure of Smiles                                                                 | ID   | Activity_Status | Consensus_score |
|-------------------------------------------------------------------------------------|------|-----------------|-----------------|
| 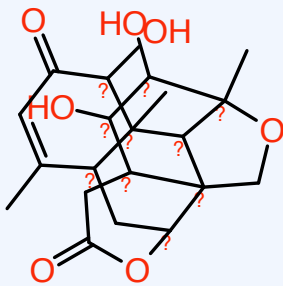   | N190 | HA              | 0.75            |
|    | N161 | HA              | 0.75            |
|   | N245 | HA              | 0.5             |
|  | N151 | HA              | 0.75            |
|  | N222 | HA              | 0.75            |

| Structure of Smiles                                                                 | ID   | Activity_Status | Consensus_score |
|-------------------------------------------------------------------------------------|------|-----------------|-----------------|
| 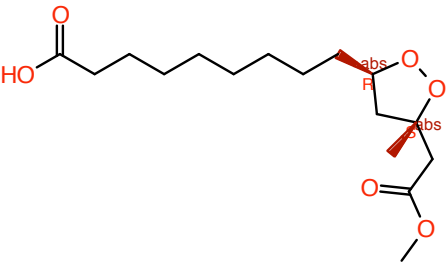   | N217 | HA              | 0.75            |
|    | N231 | HA              | 0.75            |
|   | N108 | HA              | 0.75            |
|  | N268 | HA              | 0.75            |
|  | N216 | HA              | -0.25           |

| Structure of Smiles                                                                 | ID   | Activity_Status | Consensus_score |
|-------------------------------------------------------------------------------------|------|-----------------|-----------------|
| 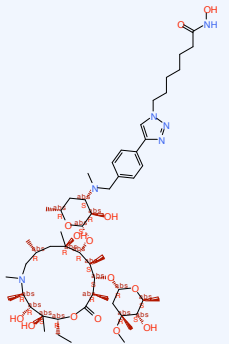   | N149 | HA              | -0.5            |
|    | N114 | HA              | 0.75            |
|   | N297 | HA              | -0.25           |
|  | N304 | HA              | 0               |
|  | N305 | HA              | 0               |

| Structure of Smiles                                                                 | ID   | Activity_Status | Consensus_score |
|-------------------------------------------------------------------------------------|------|-----------------|-----------------|
| 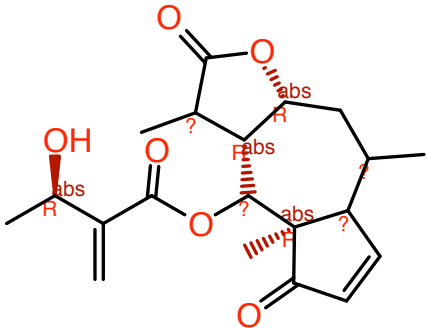   | N248 | HA              | 0.75            |
|    | N279 | HA              | 0.75            |
|   | N317 | HA              | 0.75            |
|  | N278 | HA              | 0.75            |
|  | N182 | HA              | 0.75            |

| Structure of Smiles                                                                 | ID   | Activity_Status | Consensus_score |
|-------------------------------------------------------------------------------------|------|-----------------|-----------------|
| 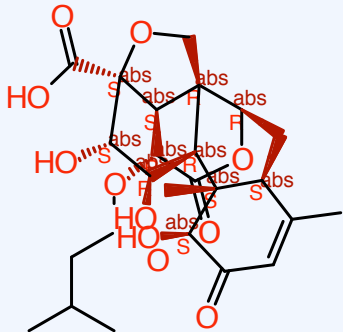   | N277 | HA              | 0               |
|    | N198 | HA              | -0.75           |
|   | N322 | HA              | -0.5            |
|  | N160 | HA              | 1               |
|  | N291 | HA              | 0.75            |

| Structure of Smiles                                                                 | ID   | Activity_Status | Consensus_score |
|-------------------------------------------------------------------------------------|------|-----------------|-----------------|
| 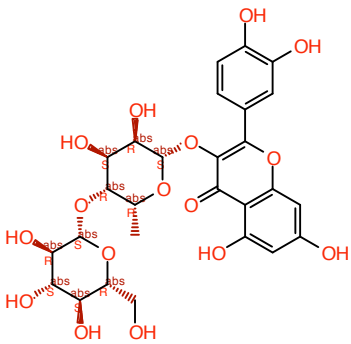   | N89  | HA              | 0               |
|    | N88  | HA              | 0.25            |
|   | N120 | HA              | 0.75            |
|  | N93  | HA              | 0.75            |
|  | N219 | HA              | -0.25           |

| Structure of Smiles                                                                 | ID   | Activity_Status | Consensus_score |
|-------------------------------------------------------------------------------------|------|-----------------|-----------------|
| 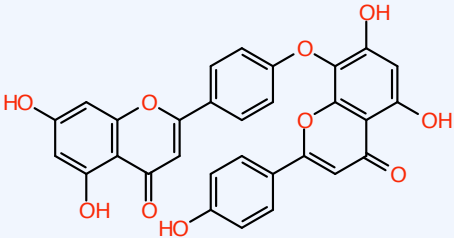   | N255 | HA              | -0.25           |
|    | N203 | HA              | -0.25           |
|   | N98  | HA              | 0.25            |
|  | N96  | HA              | 0.25            |
|  | N320 | HA              | -0.5            |

| Structure of Smiles                                                                 | ID   | Activity_Status | Consensus_score |
|-------------------------------------------------------------------------------------|------|-----------------|-----------------|
| 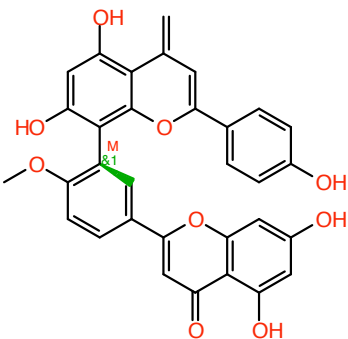   | N220 | HA              | -0.25           |
|    | N206 | HA              | 0.25            |
|   | N113 | HA              | 0               |
|  | N139 | HA              | 0.25            |
|  | N243 | HA              | 0.75            |



| Structure of Smiles                                                                 | ID   | Activity_Status | Consensus_score |
|-------------------------------------------------------------------------------------|------|-----------------|-----------------|
| 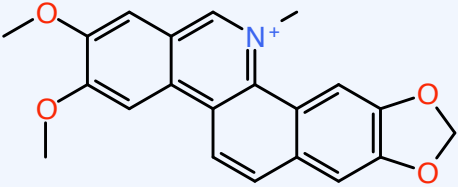   | N157 | HA              | 0.75            |
|    | N225 | HA              | 0.25            |
|   | N295 | HA              | 0.25            |
|  | N13  | HA              | 0.5             |
|  | N169 | HA              | 0.5             |

| Structure of Smiles                                                                 | ID   | Activity_Status | Consensus_score |
|-------------------------------------------------------------------------------------|------|-----------------|-----------------|
| 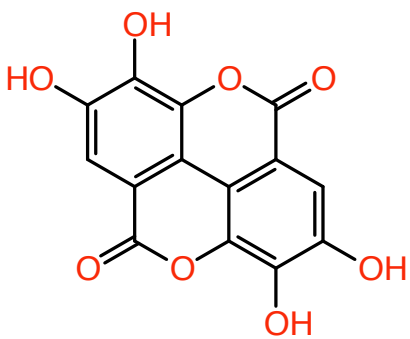   | N12  | HA              | 1               |
|    | N267 | HA              | 0               |
|   | N179 | HA              | 0.25            |
|  | N191 | HA              | 0               |
|  | N142 | HA              | 0               |

| Structure of Smiles                                                                 | ID   | Activity_Status | Consensus_score |
|-------------------------------------------------------------------------------------|------|-----------------|-----------------|
| 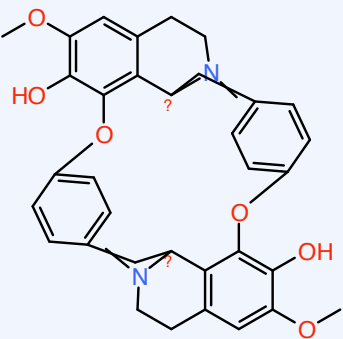   | N314 | HA              | 0               |
|    | N176 | HA              | 0               |
|   | N154 | HA              | 0               |
|  | N175 | HA              | 0.25            |
|  | N207 | HA              | 0               |

| Structure of Smiles                                                                 | ID   | Activity_Status | Consensus_score |
|-------------------------------------------------------------------------------------|------|-----------------|-----------------|
| 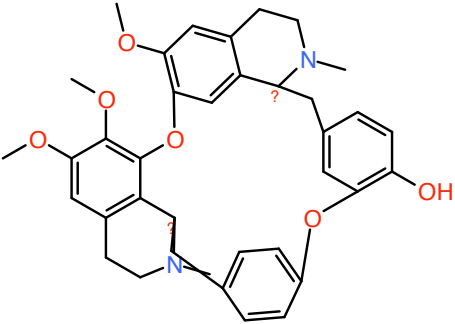   | N264 | HA              | 0               |
|    | N241 | HA              | 0               |
|   | N177 | HA              | 0               |
|  | N269 | HA              | 0.25            |
|  | N239 | HA              | 0.75            |

| Structure of Smiles                                                                 | ID   | Activity_Status | Consensus_score |
|-------------------------------------------------------------------------------------|------|-----------------|-----------------|
| 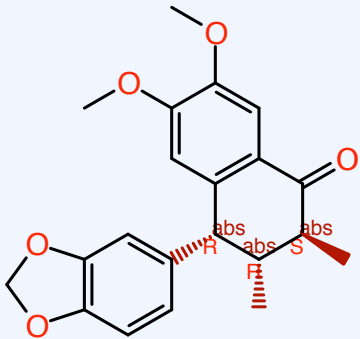   | N205 | HA              | 1               |
|    | N194 | HA              | 0               |
|   | N234 | HA              | 0               |
|  | N167 | HA              | 0.75            |
|  | N261 | HA              | 1               |

| Structure of Smiles                                                                 | ID   | Activity_Status | Consensus_score |
|-------------------------------------------------------------------------------------|------|-----------------|-----------------|
| 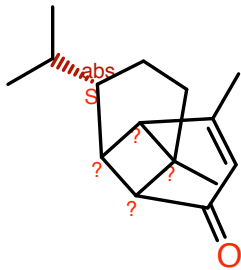   | N284 | HA              | 0.75            |
|    | N180 | HA              | 0.75            |
|   | N313 | HA              | 1               |
|  | N143 | HA              | 1               |
|  | N107 | HA              | 0.75            |

| Structure of Smiles                                                                 | ID   | Activity_Status | Consensus_score |
|-------------------------------------------------------------------------------------|------|-----------------|-----------------|
| 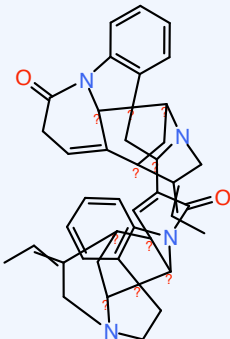   | N185 | HA              | 0               |
|    | N152 | HA              | 0.5             |
|   | N134 | HA              | 0               |
|  | N214 | HA              | 0               |
|  | N178 | HA              | 0               |

| Structure of Smiles | ID   | Activity_Status | Consensus_score |
|---------------------|------|-----------------|-----------------|
|                     | N226 | HA              | -0.25           |

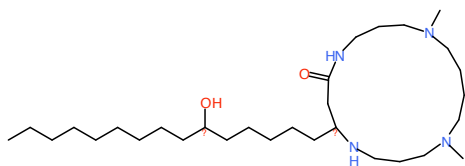

N186 HA 0.25

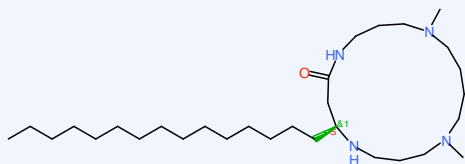

N199 HA 0.25

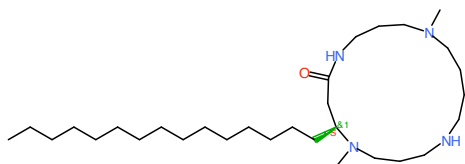

N1 HA 0.75

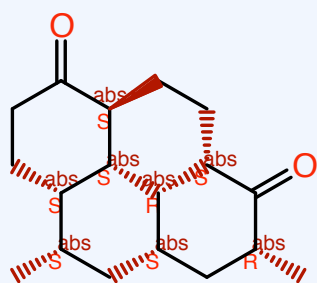

N300 HA 0

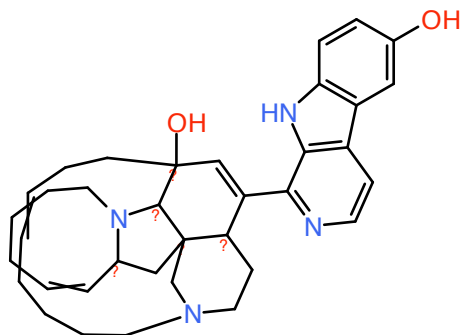



| Structure of Smiles                                                                 | ID   | Activity_Status | Consensus_score |
|-------------------------------------------------------------------------------------|------|-----------------|-----------------|
| 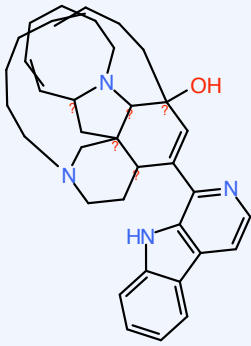   | N101 | HA              | 0               |
|    | N97  | HA              | 0               |
|   | N311 | HA              | 0.5             |
|  | N123 | HA              | 0.25            |
|  | N78  | HA              | 1               |

| Structure of Smiles                                                                 | ID   | Activity_Status | Consensus_score |
|-------------------------------------------------------------------------------------|------|-----------------|-----------------|
| 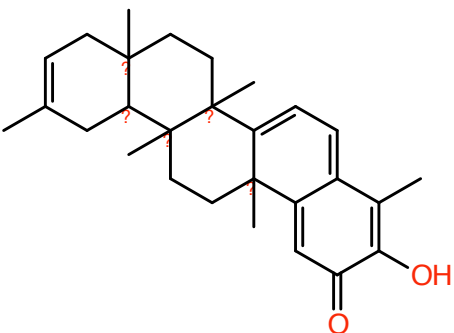   | N195 | HA              | 0.25            |
|    | N246 | HA              | 0.25            |
|   | N247 | HA              | 0.25            |
|  | N250 | HA              | 0.25            |
|  | N212 | HA              | 0.25            |

| Structure of Smiles                                                                 | ID   | Activity_Status | Consensus_score |
|-------------------------------------------------------------------------------------|------|-----------------|-----------------|
| 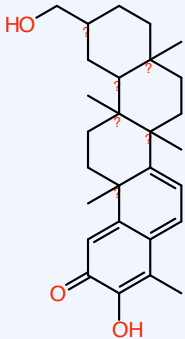   | N133 | HA              | 0.25            |
|    | N119 | HA              | 0.25            |
|   | N148 | HA              | 0.5             |
|  | N156 | HA              | 0.75            |
|  | N306 | HA              | 0               |

| Structure of Smiles                                                                 | ID   | Activity_Status | Consensus_score |
|-------------------------------------------------------------------------------------|------|-----------------|-----------------|
| 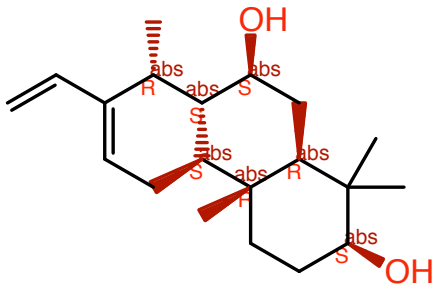   | N288 | HA              | 0.75            |
|    | N307 | HA              | 0.25            |
|   | N210 | HA              | 0.75            |
|  | N257 | HA              | 0.5             |
|  | N286 | HA              | 0.75            |

| Structure of Smiles                                                                 | ID   | Activity_Status | Consensus_score |
|-------------------------------------------------------------------------------------|------|-----------------|-----------------|
| 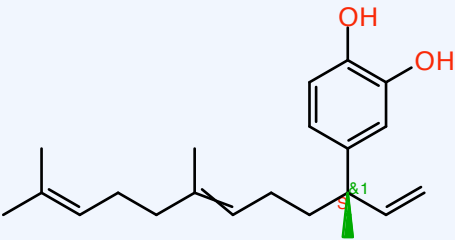   | N293 | HA              | 0.25            |
|    | N323 | HA              | 0               |
|   | N236 | HA              | 0.5             |
|  | N128 | HA              | 0.25            |
|  | N262 | HA              | 0.5             |

| Structure of Smiles | ID | Activity_Status | Consensus_score |
|---------------------|----|-----------------|-----------------|
|---------------------|----|-----------------|-----------------|

N7

HA

1

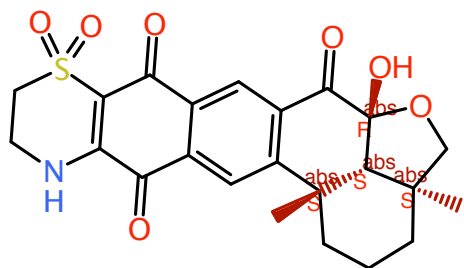

N104

HA

0.75

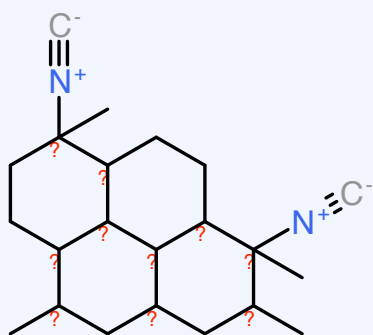

N183

HA

1

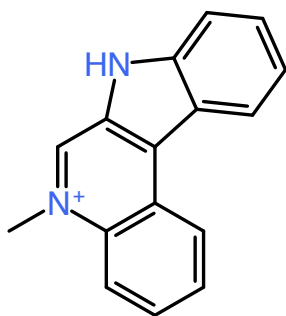

N166

HA

0.25

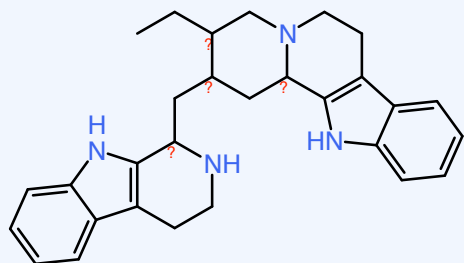

N138

HA

0.75

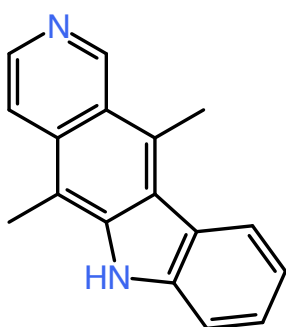

| Structure of Smiles                                                                 | ID   | Activity_Status | Consensus_score |
|-------------------------------------------------------------------------------------|------|-----------------|-----------------|
| 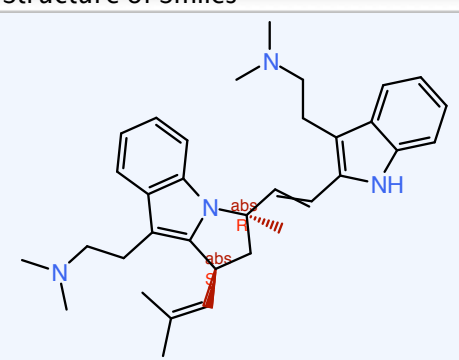   | N145 | HA              | 0.25            |
|    | N146 | HA              | 0.25            |
|   | N112 | HA              | 0               |
|  | N147 | HA              | 0.25            |
|  | N140 | HA              | 0.25            |

| Structure of Smiles                                                                 | ID   | Activity_Status | Consensus_score |
|-------------------------------------------------------------------------------------|------|-----------------|-----------------|
| 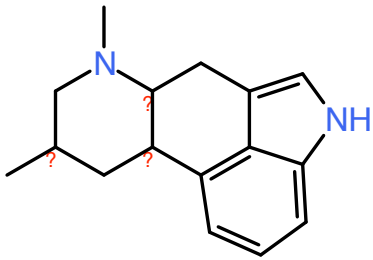   | N259 | HA              | 0.75            |
|    | N312 | HA              | 0.5             |
|   | N165 | HA              | 0.75            |
|  | N204 | HA              | 0.75            |
|  | N308 | HA              | 0.75            |



| Structure of Smiles                                                                 | ID   | Activity_Status | Consensus_score |
|-------------------------------------------------------------------------------------|------|-----------------|-----------------|
| 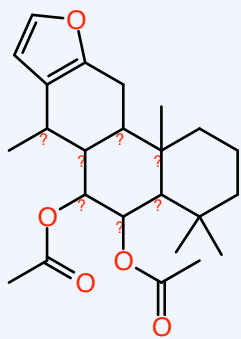   | N110 | HA              | 0.75            |
|    | N289 | HA              | 0.75            |
|   | N197 | HA              | 0.75            |
|  | N184 | HA              | 0.75            |
|  | N244 | HA              | 0.75            |

| Structure of Smiles | ID | Activity_Status | Consensus_score |
|---------------------|----|-----------------|-----------------|
|---------------------|----|-----------------|-----------------|

N85

HA

1

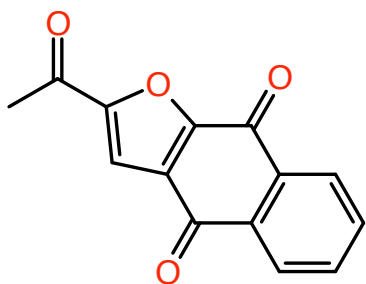

N168

HA

1

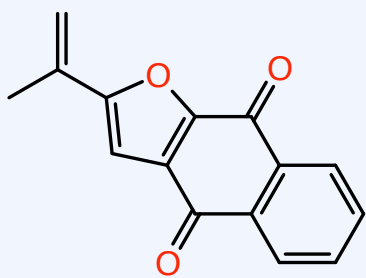

N131

HA

0.5

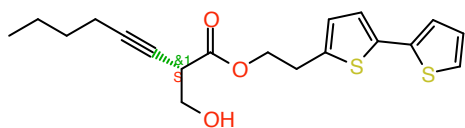

N132

HA

0.25

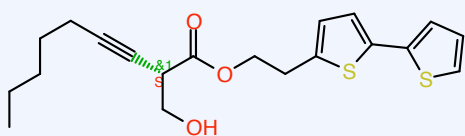

N296

HA

0.25

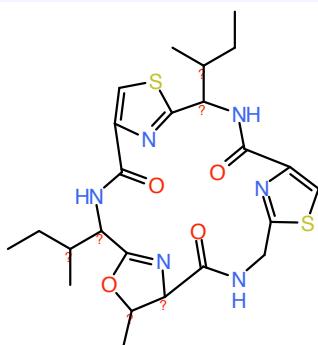

| Structure of Smiles                                                                 | ID   | Activity_Status | Consensus_score |
|-------------------------------------------------------------------------------------|------|-----------------|-----------------|
| 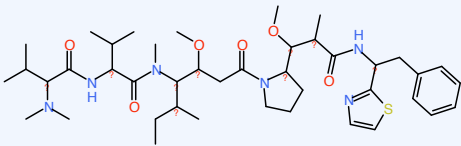   | N81  | HA              | -0.5            |
|    | N18  | MA              | 1               |
|   | N679 | MA              | 0.75            |
|  | N669 | MA              | 0.5             |
|  | N792 | MA              | 0.75            |

| Structure of Smiles                                                                 | ID   | Activity_Status | Consensus_score |
|-------------------------------------------------------------------------------------|------|-----------------|-----------------|
| 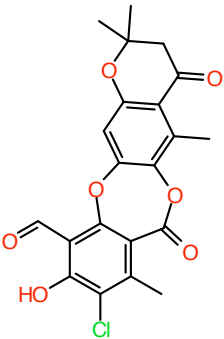   | N852 | MA              | 0.75            |
|    | N820 | MA              | -0.5            |
|   | N661 | MA              | -1              |
|  | N717 | MA              | -0.5            |
|  | N703 | MA              | -0.5            |

| Structure of Smiles                                                                 | ID   | Activity_Status | Consensus_score |
|-------------------------------------------------------------------------------------|------|-----------------|-----------------|
| 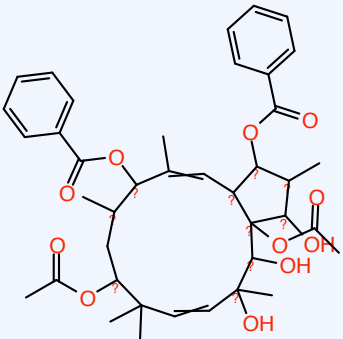   | N711 | MA              | -0.75           |
|    | N657 | MA              | 0.75            |
|   | N781 | MA              | 0               |
|  | N783 | MA              | 0.75            |
|  | N753 | MA              | 0.75            |

| Structure of Smiles | ID | Activity_Status | Consensus_score |
|---------------------|----|-----------------|-----------------|
|---------------------|----|-----------------|-----------------|

N891

MA

0

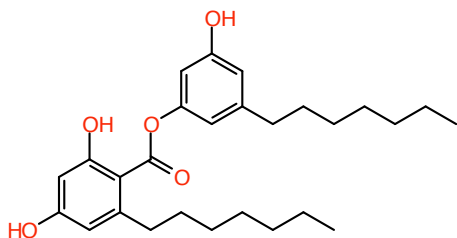

N704

MA

0

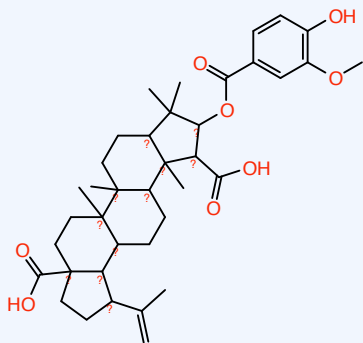

N677

MA

0.5

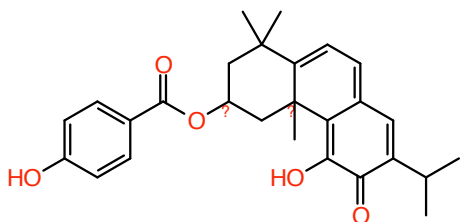

N706

MA

-0.25

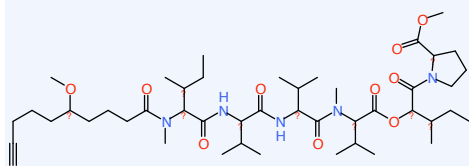

N707

MA

0.75

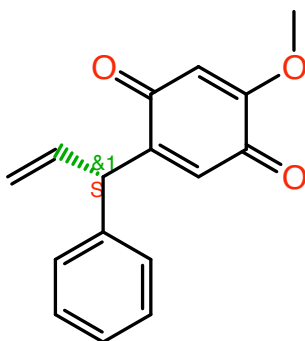

| Structure of Smiles                                                                 | ID   | Activity_Status | Consensus_score |
|-------------------------------------------------------------------------------------|------|-----------------|-----------------|
| 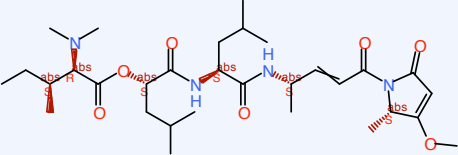   | N845 | MA              | 0.25            |
|    | N793 | MA              | 0.75            |
|   | N735 | MA              | 0.25            |
|  | N738 | MA              | 0.75            |
|  | N774 | MA              | 1               |

| Structure of Smiles | ID | Activity_Status | Consensus_score |
|---------------------|----|-----------------|-----------------|
|---------------------|----|-----------------|-----------------|

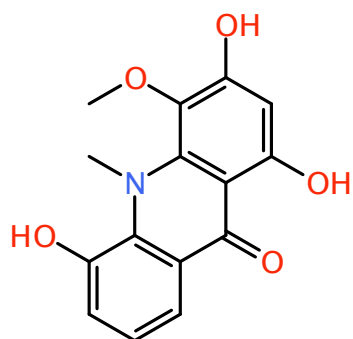

N861

MA

0.75

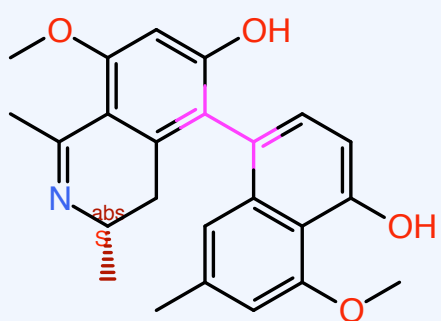

N681

MA

0.5

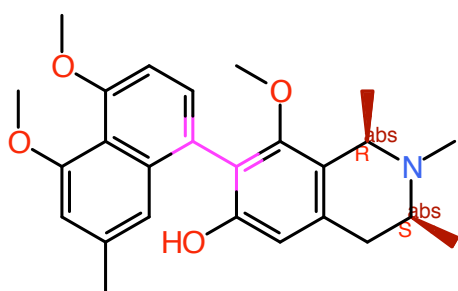

N662

MA

0.25

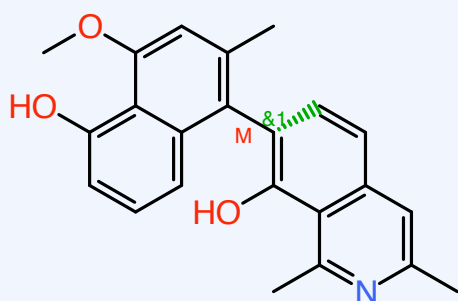

N853

MA

0.25

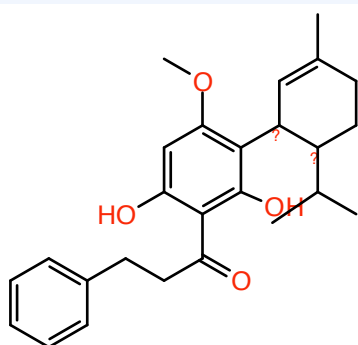

N693

MA

0.25



| Structure of Smiles                                                                 | ID   | Activity_Status | Consensus_score |
|-------------------------------------------------------------------------------------|------|-----------------|-----------------|
| 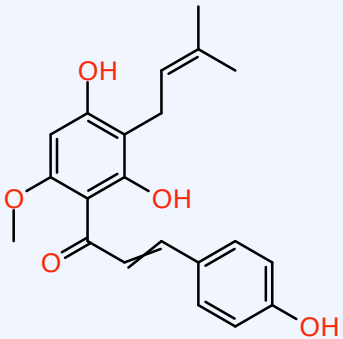   | N838 | MA              | 0.75            |
|    | N665 | MA              | 0.5             |
|   | N866 | MA              | 1               |
|  | N713 | MA              | 1               |
|  | N876 | MA              | 1               |

| Structure of Smiles                                                                 | ID   | Activity_Status | Consensus_score |
|-------------------------------------------------------------------------------------|------|-----------------|-----------------|
| 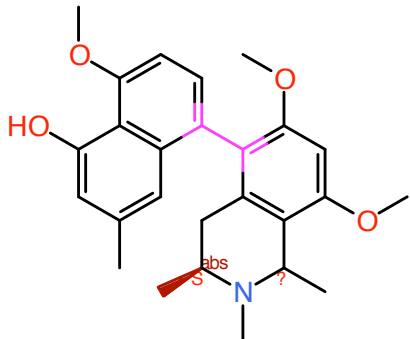   | N742 | MA              | 0.25            |
|    | N864 | MA              | 0.25            |
|   | N688 | MA              | 1               |
|  | N725 | MA              | -0.25           |
|  | N664 | MA              | -0.5            |

| Structure of Smiles                                                                 | ID   | Activity_Status | Consensus_score |
|-------------------------------------------------------------------------------------|------|-----------------|-----------------|
| 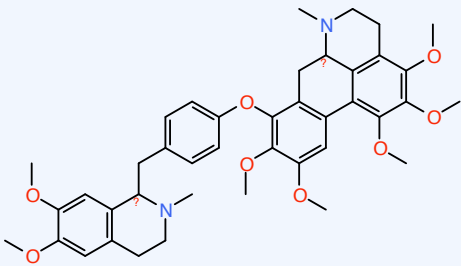   | N798 | MA              | -0.5            |
|    | N842 | MA              | 0.75            |
|   | N667 | MA              | 0.25            |
|  | N836 | MA              | -0.5            |
|  | N701 | MA              | 0.5             |

| Structure of Smiles                                                                 | ID   | Activity_Status | Consensus_score |
|-------------------------------------------------------------------------------------|------|-----------------|-----------------|
| 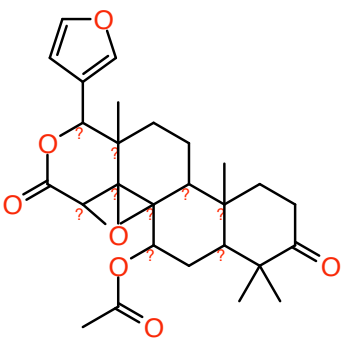   | N682 | MA              | 0.75            |
|    | N721 | MA              | 0.5             |
|   | N780 | MA              | 0.75            |
|  | N885 | MA              | 0.25            |
|  | N823 | MA              | 0.25            |

| Structure of Smiles                                                                 | ID   | Activity_Status | Consensus_score |
|-------------------------------------------------------------------------------------|------|-----------------|-----------------|
| 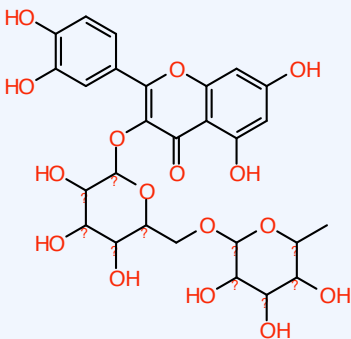   | N785 | MA              | 0               |
|    | N796 | MA              | -0.5            |
|   | N788 | MA              | 0.75            |
|  | N821 | MA              | 0.5             |
|  | N673 | MA              | -0.5            |

| Structure of Smiles                                                                 | ID   | Activity_Status | Consensus_score |
|-------------------------------------------------------------------------------------|------|-----------------|-----------------|
| 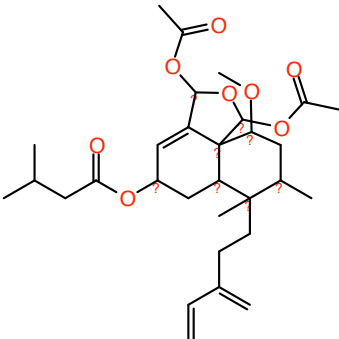   | N686 | MA              | -0.25           |
|    | N710 | MA              | 0.25            |
|   | N871 | MA              | 0.75            |
|  | N709 | MA              | 1               |
|  | N692 | MA              | 0.75            |

| Structure of Smiles                                                                 | ID   | Activity_Status | Consensus_score |
|-------------------------------------------------------------------------------------|------|-----------------|-----------------|
| 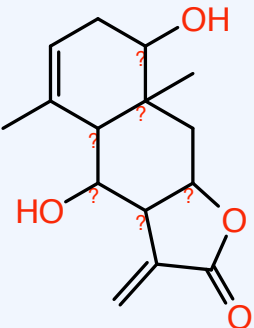   | N888 | MA              | 0.75            |
|    | N886 | MA              | 0.75            |
|   | N712 | MA              | 0.5             |
|  | N751 | MA              | 0.5             |
|  | N685 | MA              | 0               |

| Structure of Smiles                                                                 | ID   | Activity_Status | Consensus_score |
|-------------------------------------------------------------------------------------|------|-----------------|-----------------|
| 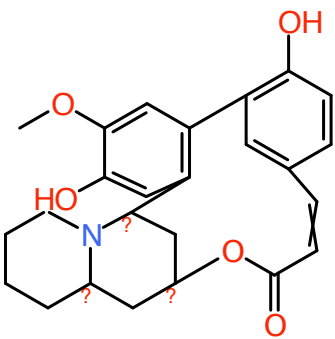   | N768 | MA              | 0.5             |
|    | N816 | MA              | 1               |
|   | N865 | MA              | 0.25            |
|  | N680 | MA              | -0.25           |
|  | N801 | MA              | 0.75            |



| Structure of Smiles                                                                 | ID   | Activity_Status | Consensus_score |
|-------------------------------------------------------------------------------------|------|-----------------|-----------------|
| 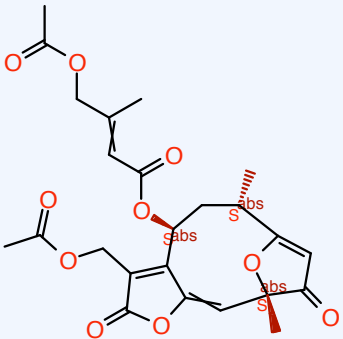   | N684 | MA              | 0.5             |
|    | N656 | MA              | -0.25           |
|   | N652 | MA              | 0               |
|  | N654 | MA              | 0               |
|  | N651 | MA              | 0               |

| Structure of Smiles                                                                 | ID   | Activity_Status | Consensus_score |
|-------------------------------------------------------------------------------------|------|-----------------|-----------------|
| 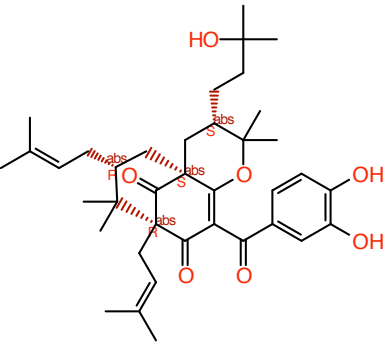   | N655 | MA              | 0               |
|    | N771 | MA              | 1               |
|   | N858 | MA              | 0.5             |
|  | N848 | MA              | 1               |
|  | N884 | MA              | 1               |

| Structure of Smiles                                                                 | ID   | Activity_Status | Consensus_score |
|-------------------------------------------------------------------------------------|------|-----------------|-----------------|
| 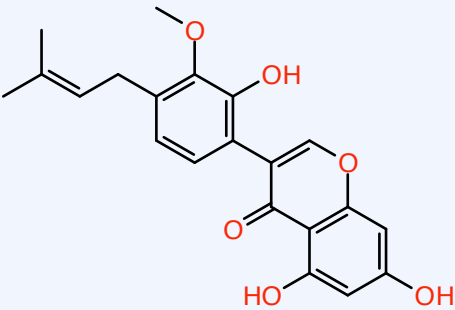   | N748 | MA              | 0.75            |
|    | N805 | MA              | 0.75            |
|   | N715 | MA              | 0               |
|  | N835 | MA              | 0.75            |
|  | N863 | MA              | 0.25            |

| Structure of Smiles                                                                 | ID   | Activity_Status | Consensus_score |
|-------------------------------------------------------------------------------------|------|-----------------|-----------------|
| 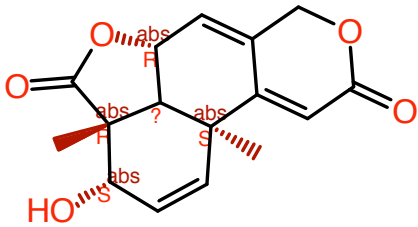   | N830 | MA              | 0.75            |
|    | N833 | MA              | 0.75            |
|   | N834 | MA              | 0.75            |
|  | N831 | MA              | 0.75            |
|  | N828 | MA              | 0.75            |

| Structure of Smiles                                                                 | ID   | Activity_Status | Consensus_score |
|-------------------------------------------------------------------------------------|------|-----------------|-----------------|
| 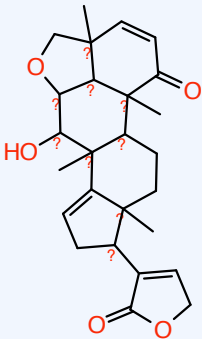   | N663 | MA              | 0.75            |
|    | N887 | MA              | 0.75            |
|   | N832 | MA              | 0.75            |
|  | N829 | MA              | 0.75            |
|  | N827 | MA              | 0.75            |

| Structure of Smiles                                                                 | ID   | Activity_Status | Consensus_score |
|-------------------------------------------------------------------------------------|------|-----------------|-----------------|
| 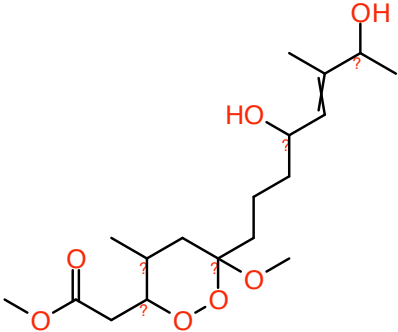   | N659 | MA              | 0.5             |
|    | N727 | MA              | 0.75            |
|   | N770 | MA              | 0               |
|  | N660 | MA              | 1               |
|  | N689 | MA              | 0.75            |

| Structure of Smiles                                                                 | ID   | Activity_Status | Consensus_score |
|-------------------------------------------------------------------------------------|------|-----------------|-----------------|
| 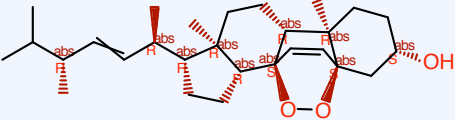   | N744 | MA              | 0.25            |
|    | N752 | MA              | 0.75            |
|   | N716 | MA              | -0.25           |
|  | N844 | MA              | 0               |
|  | N674 | MA              | 0.75            |

| Structure of Smiles                                                                 | ID   | Activity_Status | Consensus_score |
|-------------------------------------------------------------------------------------|------|-----------------|-----------------|
| 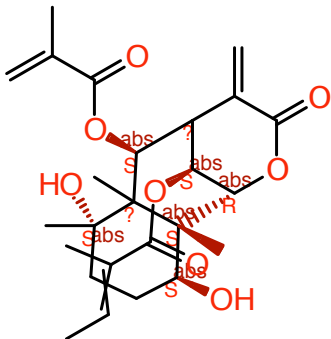   | N868 | MA              | 0.75            |
|    | N856 | MA              | 0.5             |
|   | N745 | MA              | 1               |
|  | N782 | MA              | 0.75            |
|  | N757 | MA              | -0.25           |



| Structure of Smiles                                                                 | ID   | Activity_Status | Consensus_score |
|-------------------------------------------------------------------------------------|------|-----------------|-----------------|
| 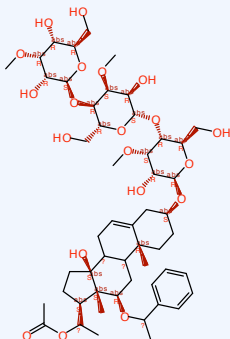   | N799 | MA              | -0.25           |
|    | N802 | MA              | -0.25           |
|   | N698 | MA              | -0.25           |
|  | N883 | MA              | -0.25           |
|  | N875 | MA              | 0.5             |

| Structure of Smiles                                                                 | ID   | Activity_Status | Consensus_score |
|-------------------------------------------------------------------------------------|------|-----------------|-----------------|
| 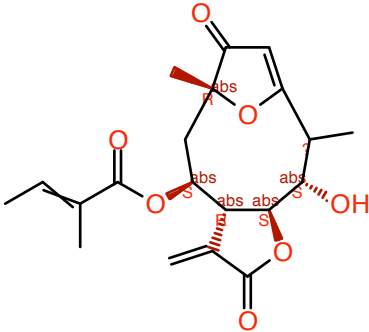   | N824 | MA              | 0.75            |
|    | N786 | MA              | 0.25            |
|   | N733 | MA              | -0.25           |
|  | N795 | MA              | -0.5            |
|  | N749 | MA              | 0.25            |

| Structure of Smiles                                                                 | ID   | Activity_Status | Consensus_score |
|-------------------------------------------------------------------------------------|------|-----------------|-----------------|
| 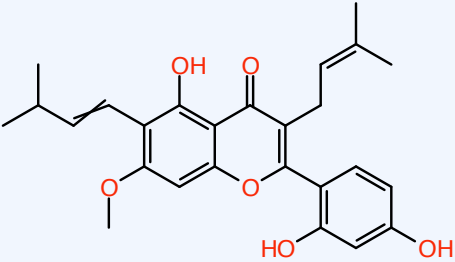   | N773 | MA              | 0.25            |
|    | N672 | MA              | 0.25            |
|   | N759 | MA              | 0.25            |
|  | N806 | MA              | 1               |
|  | N737 | MA              | 0.5             |

| Structure of Smiles                                                                 | ID   | Activity_Status | Consensus_score |
|-------------------------------------------------------------------------------------|------|-----------------|-----------------|
| 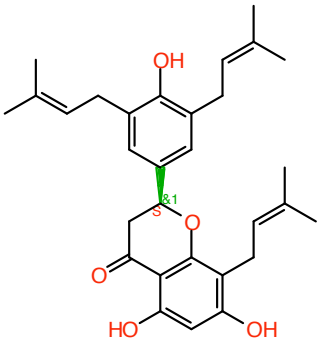   | N676 | MA              | 0.25            |
|    | N869 | MA              | 0.25            |
|   | N671 | MA              | 0.25            |
|  | N734 | MA              | -0.5            |
|  | N855 | MA              | 0.25            |

| Structure of Smiles                                                                 | ID   | Activity_Status | Consensus_score |
|-------------------------------------------------------------------------------------|------|-----------------|-----------------|
| 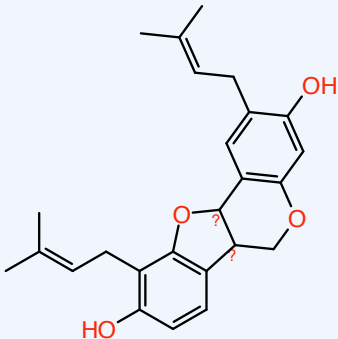   | N756 | MA              | 0.25            |
|    | N819 | MA              | 0.25            |
|   | N719 | MA              | 0.25            |
|  | N731 | MA              | 0.25            |
|  | N878 | MA              | 1               |

| Structure of Smiles | ID   | Activity_Status | Consensus_score |
|---------------------|------|-----------------|-----------------|
|                     | N761 | MA              | 0.75            |

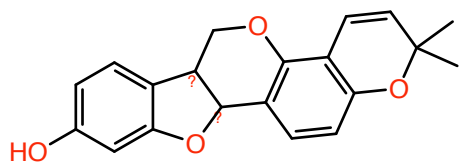

|  |      |    |      |
|--|------|----|------|
|  | N718 | MA | 0.25 |
|--|------|----|------|

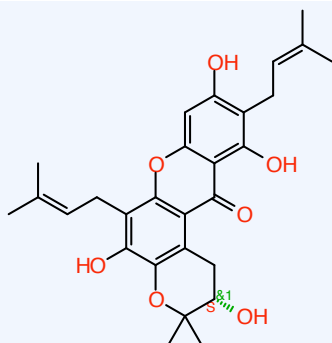

|  |      |    |      |
|--|------|----|------|
|  | N732 | MA | 0.25 |
|--|------|----|------|

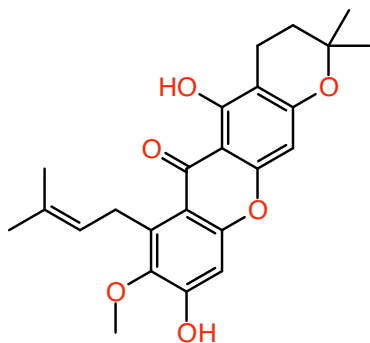

|  |      |    |   |
|--|------|----|---|
|  | N687 | MA | 1 |
|--|------|----|---|

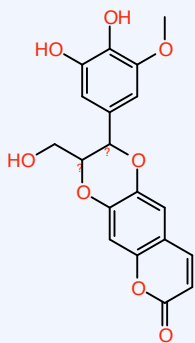

|  |      |    |   |
|--|------|----|---|
|  | N826 | MA | 1 |
|--|------|----|---|

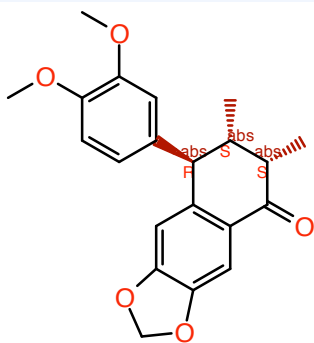

| Structure of Smiles                                                                 | ID   | Activity_Status | Consensus_score |
|-------------------------------------------------------------------------------------|------|-----------------|-----------------|
| 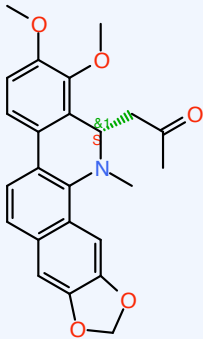   | N699 | MA              | 0.5             |
|    | N779 | MA              | 0.75            |
|   | N722 | MA              | 0.25            |
|  | N720 | MA              | 0.25            |
|  | N784 | MA              | 0.25            |

| Structure of Smiles                                                                 | ID   | Activity_Status | Consensus_score |
|-------------------------------------------------------------------------------------|------|-----------------|-----------------|
| 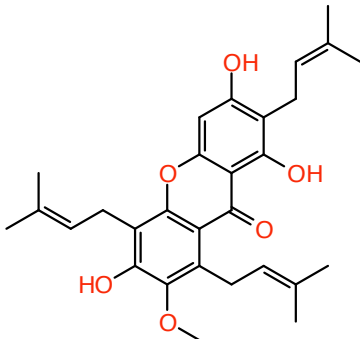   | N675 | MA              | 0.25            |
|    | N862 | MA              | 0.5             |
|   | N746 | MA              | 0.25            |
|  | N743 | MA              | 0.25            |
|  | N729 | MA              | 0.25            |



| Structure of Smiles                                                                 | ID   | Activity_Status | Consensus_score |
|-------------------------------------------------------------------------------------|------|-----------------|-----------------|
| 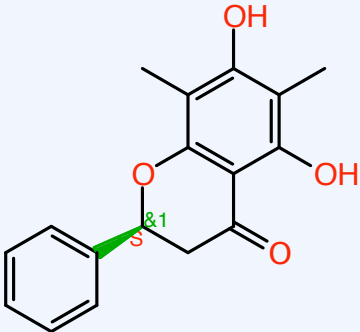   | N877 | MA              | 0.75            |
|    | N766 | MA              | 0.75            |
|   | N867 | MA              | 1               |
|  | N763 | MA              | 1               |
|  | N860 | MA              | 1               |

| Structure of Smiles                                                                 | ID   | Activity_Status | Consensus_score |
|-------------------------------------------------------------------------------------|------|-----------------|-----------------|
| 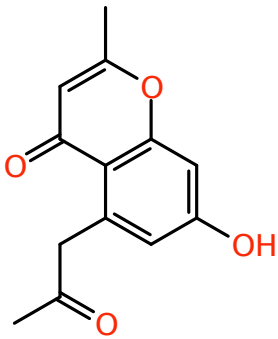   | N850 | MA              | 0.75            |
|    | N690 | MA              | 0.5             |
|   | N794 | MA              | 0.25            |
|  | N857 | MA              | 0.75            |
|  | N879 | MA              | 0.25            |

| Structure of Smiles                                                                 | ID   | Activity_Status | Consensus_score |
|-------------------------------------------------------------------------------------|------|-----------------|-----------------|
| 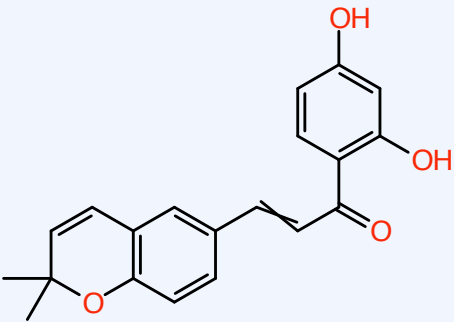   | N882 | MA              | 1               |
|    | N837 | MA              | 1               |
|   | N808 | MA              | 0.5             |
|  | N803 | MA              | -0.25           |
|  | N741 | MA              | 0.75            |

| Structure of Smiles                                                                 | ID   | Activity_Status | Consensus_score |
|-------------------------------------------------------------------------------------|------|-----------------|-----------------|
| 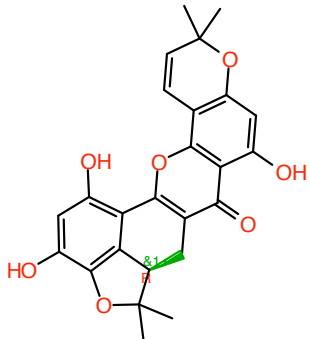   | N847 | MA              | 0.5             |
|    | N822 | MA              | 0.75            |
|   | N814 | MA              | 0               |
|  | N772 | MA              | 0.25            |
|  | N890 | MA              | 0.25            |

| Structure of Smiles                                                               | ID   | Activity_Status | Consensus_score |
|-----------------------------------------------------------------------------------|------|-----------------|-----------------|
| 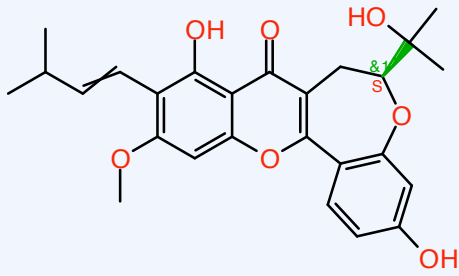 | N813 | MA              | 0.5             |

|                                                                                   |      |    |   |
|-----------------------------------------------------------------------------------|------|----|---|
| 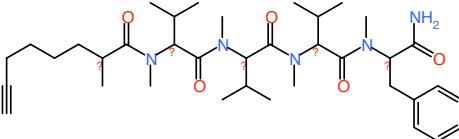 | N809 | MA | 0 |
|-----------------------------------------------------------------------------------|------|----|---|

|                                                                                    |      |    |      |
|------------------------------------------------------------------------------------|------|----|------|
| 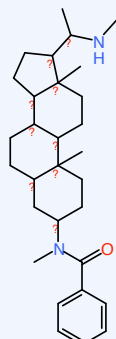 | N760 | MA | 0.25 |
|------------------------------------------------------------------------------------|------|----|------|

|                                                                                     |      |    |      |
|-------------------------------------------------------------------------------------|------|----|------|
| 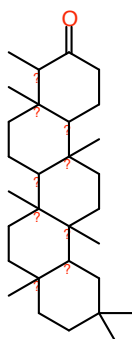 | N812 | MA | 0.25 |
|-------------------------------------------------------------------------------------|------|----|------|

|                                                                                     |      |    |      |
|-------------------------------------------------------------------------------------|------|----|------|
| 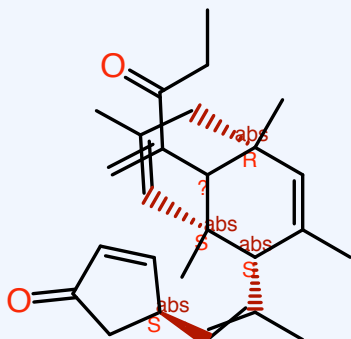 | N666 | MA | 0.25 |
|-------------------------------------------------------------------------------------|------|----|------|

| Structure of Smiles                                                                 | ID   | Activity_Status | Consensus_score |
|-------------------------------------------------------------------------------------|------|-----------------|-----------------|
| 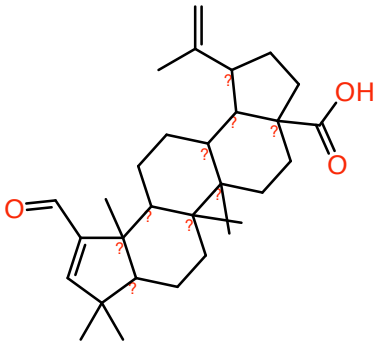   | N758 | MA              | 0.25            |
|    | N825 | MA              | 0.25            |
|   | N797 | MA              | 1               |
|  | N724 | MA              | 0.5             |
|  | N872 | MA              | 0.75            |

| Structure of Smiles                                                                 | ID   | Activity_Status | Consensus_score |
|-------------------------------------------------------------------------------------|------|-----------------|-----------------|
| 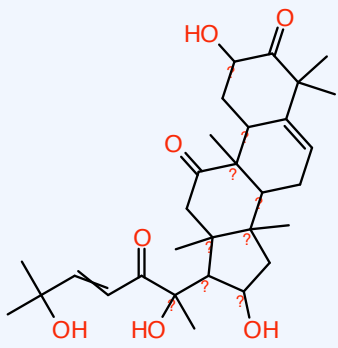   | N811 | MA              | 0.5             |
|    | N889 | MA              | 0.25            |
|   | N804 | MA              | 0.75            |
|  | N880 | MA              | 0               |
|  | N854 | MA              | 0.25            |

| Structure of Smiles                                                                 | ID   | Activity_Status | Consensus_score |
|-------------------------------------------------------------------------------------|------|-----------------|-----------------|
| 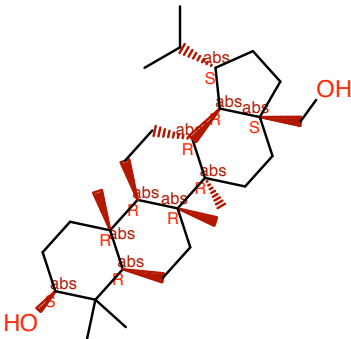   | N787 | MA              | 0.25            |
|    | N789 | MA              | 0.25            |
|   | N851 | MA              | 0.25            |
|  | N775 | MA              | 0               |
|  | N702 | MA              | 0.75            |



| Structure of Smiles                                                                 | ID   | Activity_Status | Consensus_score |
|-------------------------------------------------------------------------------------|------|-----------------|-----------------|
| 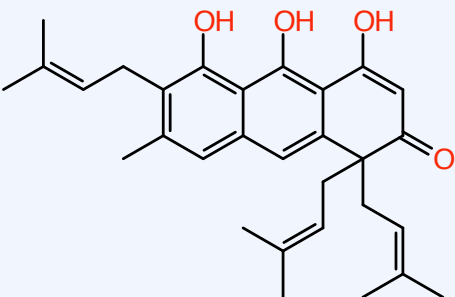   | N658 | MA              | 0.25            |
|    | N678 | MA              | 0.25            |
|   | N14  | MA              | 1               |
|  | N670 | MA              | 0.25            |
|  | N815 | MA              | 1               |



| Structure of Smiles                                                                 | ID   | Activity_Status | Consensus_score |
|-------------------------------------------------------------------------------------|------|-----------------|-----------------|
| 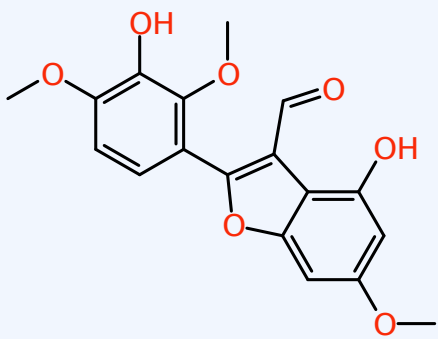   | N740 | MA              | 0.75            |
|    | N764 | MA              | 0.75            |
|   | N754 | MA              | 0.75            |
|  | N705 | MA              | 0.75            |
|  | N776 | MA              | 0.5             |

| Structure of Smiles                                                                 | ID   | Activity_Status | Consensus_score |
|-------------------------------------------------------------------------------------|------|-----------------|-----------------|
| 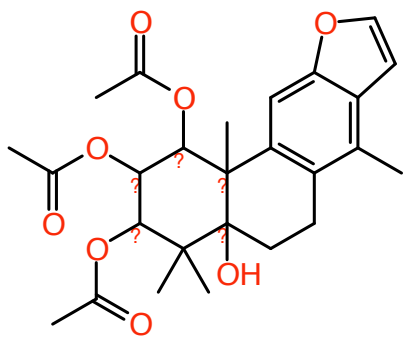   | N755 | MA              | 0.5             |
|    | N874 | MA              | 1               |
|   | N750 | MA              | 0.5             |
|  | N700 | MA              | 0.25            |
|  | N694 | MA              | 0.25            |
